# Supplementary material for: Nature of adverse events with opioids in hospitalised patients: a post-hoc analysis of three patient record review studies
Source: PubMed Central journal article supplement — BMJ Open. 2020 Sep 30;10(9):e038037. doi: 10.1136/bmjopen-2020-038037 (PMC7528356; doi:10.1136/bmjopen-2020-038037), 2020-09-30
Supplement: bmjopen-2020-038037.draft_revisions.pdf [file bmjopen-2020-038037.draft_revisions.pdf]

# BMJ Open

BMJ Open is committed to open peer review. As part of this commitment we make the peer review history of every article we publish publicly available.

When an article is published we post the peer reviewers' comments and the authors' responses online. We also post the versions of the paper that were used during peer review. These are the versions that the peer review comments apply to.

The versions of the paper that follow are the versions that were submitted during the peer review process. They are not the versions of record or the final published versions. They should not be cited or distributed as the published version of this manuscript.

BMJ Open is an open access journal and the full, final, typeset and author-corrected version of record of the manuscript is available on our site with no access controls, subscription charges or pay-per-view fees (<http://bmjopen.bmj.com>).

If you have any questions on BMJ Open's open peer review process please email [info.bmjopen@bmj.com](mailto:info.bmjopen@bmj.com)

# BMJ Open

## Learning from dosing errors with opioids: a post-hoc analysis of three Dutch adverse event studies.

|                               |                                                                                                                                                                                                                                                                                                                                                                                                                                                                                                                                                                                                                                                                                                      |
|-------------------------------|------------------------------------------------------------------------------------------------------------------------------------------------------------------------------------------------------------------------------------------------------------------------------------------------------------------------------------------------------------------------------------------------------------------------------------------------------------------------------------------------------------------------------------------------------------------------------------------------------------------------------------------------------------------------------------------------------|
| Journal:                      | <i>BMJ Open</i>                                                                                                                                                                                                                                                                                                                                                                                                                                                                                                                                                                                                                                                                                      |
| Manuscript ID                 | bmjopen-2020-038037                                                                                                                                                                                                                                                                                                                                                                                                                                                                                                                                                                                                                                                                                  |
| Article Type:                 | Original research                                                                                                                                                                                                                                                                                                                                                                                                                                                                                                                                                                                                                                                                                    |
| Date Submitted by the Author: | 26-Feb-2020                                                                                                                                                                                                                                                                                                                                                                                                                                                                                                                                                                                                                                                                                          |
| Complete List of Authors:     | <p>Schutijser, Bernadette; Amsterdam UMC, Vrije Universiteit Amsterdam, Public &amp; Occupational Health<br/>         Jongerden, Irene; Amsterdam UMC, Vrije Universiteit Amsterdam, Public and Occupational Health<br/>         Klopotoska, Joanna; Amsterdam UMC, Academic Medical Center Amsterdam, Medical Informatics<br/>         Moesker, Marco; Amsterdam UMC, Vrije Universiteit Amsterdam, Public and Occupational Health<br/>         Langelaan, Maaïke; PinkRocade Healthcare<br/>         Wagner, Cordula; Netherlands Institute for Health Services Research (NIVEL)<br/>         de Bruijne, Martine; Amsterdam UMC, Vrije Universiteit Amsterdam, Public and Occupational Health</p> |
| Keywords:                     | PAIN MANAGEMENT, Adverse events < THERAPEUTICS, Health & safety < HEALTH SERVICES ADMINISTRATION & MANAGEMENT, Quality in health care < HEALTH SERVICES ADMINISTRATION & MANAGEMENT                                                                                                                                                                                                                                                                                                                                                                                                                                                                                                                  |
|                               |                                                                                                                                                                                                                                                                                                                                                                                                                                                                                                                                                                                                                                                                                                      |

SCHOLARONE™  
Manuscripts

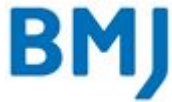

I, the Submitting Author has the right to grant and does grant on behalf of all authors of the Work (as defined in the below author licence), an exclusive licence and/or a non-exclusive licence for contributions from authors who are: i) UK Crown employees; ii) where BMJ has agreed a CC-BY licence shall apply, and/or iii) in accordance with the terms applicable for US Federal Government officers or employees acting as part of their official duties; on a worldwide, perpetual, irrevocable, royalty-free basis to BMJ Publishing Group Ltd ("BMJ") its licensees and where the relevant Journal is co-owned by BMJ to the co-owners of the Journal, to publish the Work in this journal and any other BMJ products and to exploit all rights, as set out in our [licence](#).

The Submitting Author accepts and understands that any supply made under these terms is made by BMJ to the Submitting Author unless you are acting as an employee on behalf of your employer or a postgraduate student of an affiliated institution which is paying any applicable article publishing charge ("APC") for Open Access articles. Where the Submitting Author wishes to make the Work available on an Open Access basis (and intends to pay the relevant APC), the terms of reuse of such Open Access shall be governed by a Creative Commons licence – details of these licences and which [Creative Commons](#) licence will apply to this Work are set out in our licence referred to above.

Other than as permitted in any relevant BMJ Author's Self Archiving Policies, I confirm this Work has not been accepted for publication elsewhere, is not being considered for publication elsewhere and does not duplicate material already published. I confirm all authors consent to publication of this Work and authorise the granting of this licence.

**TITLE PAGE****Learning from dosing errors with opioids: a post-hoc analysis of three Dutch adverse event studies.**

*Bernadette C.F.M. Schutijser, MSc<sup>1</sup>, Irene P. Jongerden, PhD<sup>1</sup>, Joanna E. Klopowska, PhD<sup>2</sup>, Marco J. Moesker, MSc<sup>1</sup>, Maaïke Langelaan, PhD<sup>3</sup>, Cordula Wagner, PhD<sup>1,4</sup>, Martine C. de Bruijne, PhD<sup>1</sup>*

<sup>1</sup> Amsterdam UMC, Vrije Universiteit Amsterdam, Department of Public and Occupational Health, Amsterdam Public Health, Amsterdam, the Netherlands.

<sup>2</sup> Amsterdam UMC, Academic Medical Center Amsterdam, Department of Medical Informatics, Amsterdam, the Netherlands.

<sup>3</sup> PinkRoccade Healthcare, Apeldoorn, The Netherlands.

<sup>4</sup> Netherlands Institute for Health Services Research (NIVEL), Utrecht, The Netherlands.

**Corresponding author**

Bernadette C.F.M. Schutijser, MSc, RN

Amsterdam UMC, Vrije Universiteit Amsterdam

Department of Public and Occupational Health, Amsterdam Public Health research institute

Van der Boechorststraat 7, 1081 BT Amsterdam, The Netherlands

Email: b.schutijser@amsterdamumc.nl / Telephone: +31(0)204449612

**Word count** 3276

**ABSTRACT****Objectives**

Opioids are increasingly prescribed and frequently involved in adverse drug events (ADEs). The underlying nature of opioid related ADEs (ORADEs) is however understudied. This hampers our understanding of risks related to opioid use during hospitalization and when designing interventions. Therefore, we provided a description of the nature of ORADEs.

**Methods**

A post-hoc analysis of data collected during three Dutch retrospective patient record review studies in 32 hospitals (conducted in 2008, 2011/2012 and 2015/2016). Per identified ORADE, we described preventability, type of medication error, attributable factors and type of opioid involved. Moreover, characteristics of preventable and non-preventable ORADEs were compared to identify risk factors.

**Results**

Out of 10,917 patient records, 357 ADEs were identified of which 28 (8%) involved opioids. Eleven ORADEs were assessed as preventable. Of these, ten were caused by dosing errors and four probably contributed to the patients' death. Attributable factors identified were mainly on patient and organizational level. Morphine and oxycodone were the most frequently involved opioids. The risk for ORADEs was higher in elderly patients.

**Conclusions**

Only 8% of ADEs identified in our sample were related to opioids. Although the frequency is low, the risk of serious consequences is high. We recommend to use our findings to increase awareness among physicians and nurses. Future interventions should focus on safe dosing of opioids when prescribing and administering, especially in elderly patients.

**Keywords** Analgesia, Pain control, Adverse drug events, Hospitals, Drug Prescriptions, Opioids, ORADE

(225 words, without key-words)

**STRENGTHS AND LIMITATIONS OF THIS STUDY**

- This study was conducted during three national retrospective patient record review studies conducted in 2008, 2011/2012 and 2015/2016 within 32 Dutch hospitals.
- During all three studies, a broad and randomly selected sample of all hospital admissions of patients were reviewed to assess the nature and preventability of adverse drug events with opioids.
- Our study population was stratified, resulting in an overrepresentation of in-hospital deceased patients.
- The low frequency of ORADEs limited a comparison of events over time between the three study periods.

For peer review only

## TEXT

### INTRODUCTION

Over the past decades, prescription of opioids has substantially increased worldwide.<sup>1,2</sup> Moreover, the rise in addiction rates and deaths resulting from opioid overdoses have urged physicians to call out an opioid crisis.<sup>3</sup> In the Netherlands, the prescription of oxycodone has increased almost fivefold over ten years (from 96.000 users in 2008 to 485.000 users in 2018).<sup>4</sup> This increase may however not only lead to more addiction but may also affect the number of opioid related adverse drug events (ADEs) in hospitals.

Opioids are frequently involved in ADEs,<sup>5-7</sup> and approximately in 2-14% of all patients.<sup>8-11</sup> ADEs are unintended injuries from a medical intervention related to drugs.<sup>12</sup> Opioid related ADEs (ORADEs) occur frequently, specifically in pediatric,<sup>7,13</sup> palliative<sup>14</sup> and surgical patients.<sup>10,11,15</sup> ORADEs are often caused by errors such as omissions or incorrect dosing.<sup>7,13,14,16</sup> In addition, approximately 11% of ORADEs among hospitalized patients cause severe or even fatal patient harm,<sup>17</sup> also because of the fast therapeutic effects of opioids. Besides these severe consequences, ORADEs lead to significantly higher healthcare costs.<sup>9,10,15</sup>

Our current knowledge about the incidence of ORADEs and their underlying nature is mostly based on medication related incident reports.<sup>7,13,14,16</sup> However, a comprehensive patient chart review provides the most reliable information on ADEs in hospitals while incident reports suffer from severe underreporting.<sup>18,19</sup> Furthermore, ORADE studies based on incident reports were usually conducted at one point in time or within one hospital or at a specific department.<sup>7,13,14,16</sup> The few ORADE studies based on comprehensive patient chart review were mainly conducted within a surgical population.<sup>10,11,15</sup>

Therefore, and also motivated by the opioid crisis, we have conducted an in-depth analysis of ORADEs using data gathered during three consecutive national adverse event studies in the Netherlands in which patient record review was applied. To our knowledge, no such longitudinal multicenter study on ORADEs in a diverse inpatient population and using a comprehensive ADE detection method has been published. The aim of this study was to provide a detailed description of the underlying nature of ORADEs. By doing so, we hope to increase awareness and provide recommendations on how to prevent opioid related ADEs in future hospitalized patients.

### METHODS

#### Design and setting

We conducted a post-hoc analysis of data that were collected during three national retrospective patient record review studies conducted in 2008, 2011/2012 and 2015/2016. The aim of these studies was to identify AEs and ADEs in Dutch hospitals. A detailed description of the methodology used in these studies was previously published.<sup>20-22</sup> In summary, for the 2008 and 2011/2012 studies, a random sample of 20 hospitals participated. In 2015/2016, a new random sample of 19 hospitals was selected, of which seven had previously participated in two of the earlier studies. Both samples were stratified for hospital type and representation of urban and rural area. In 2008 and 2011/2012, 200 patient records per hospital were randomly selected for review; 100 records of discharged patients and 100 records of in-hospital deceased patients. The 2015/2016 study was limited to 150 in-hospital deceased patients per hospital because the frequency of preventable AEs remained unchanged for in-hospital deceased patients in both the 2008 and the 2011/2012 measurement.<sup>21,23,24</sup> Records of patients younger than one year and of patients admitted at the departments of psychiatry and obstetrics were excluded because other expertise is necessary to

1  
2  
3 detect AEs in these patients. The medical ethical committee of the Amsterdam UMC, Vrije  
4 Universiteit Amsterdam waived the requirement of informed consent (protocol numbers: 2005.146,  
5 2009.130, 2016.282) as they found the scope of the study outside the Dutch Medical Research  
6 (Human Subjects) Act.  
7  
8

### 9 **Review procedure AE studies**

10 During all three AE studies, selected patient records were reviewed for the occurrence of AEs,  
11 including ADEs. In Figure 1, a schematic overview of the review process in the national studies and  
12 this study is presented. In summary, the review process consisted of two phases. In phase one, the  
13 records were screened for potential AEs by trained independent nurses. When predefined triggers  
14 were found, indicating an AE might have occurred, the record was labelled for an in-depth review by  
15 a trained independent physician. Independent means that the physicians and nurses never had an  
16 employment contract in the participating hospitals. The physicians were highly experienced and  
17 specialized in surgery, internal medicine or neurology, and during the record review studies they had  
18 access to all information in the electronic patient record. Besides, 10% of all patient records were  
19 reviewed by two physicians to determine inter-rater reliability.  
20

21 An AE was defined by three criteria: 1) an unintended physical or mental injury; 2) the injury resulted  
22 in prolongation of hospital stay, temporary or permanent disability or death; 3) the injury was caused  
23 by healthcare management rather than the patient's underlying disease.<sup>20,21,25</sup> An AE was scored as  
24 caused by the healthcare (causality) if the likelihood score was equal to or greater than 4 based on a  
25 6-point Likert scale with (virtually) no evidence (1), slight to modest evidence (2), not likely, but  
26 borderline (3), more likely but borderline (4), moderate to strong evidence (5), or (virtually) certain  
27 evidence (6) of management causation. The scoring system was used in all three record review  
28 studies.  
29

30 If an AE was identified, the independent physicians (hereafter: experts) assessed each AE on:  
31 cause (diagnostic, surgery, non-invasive procedure, medication, other clinical activities, admission,  
32 and other), preventability, possible contribution to death, and attributable factors (e.g. technical,  
33 care, organizational, patient related, violation and other). An AE was considered to be preventable  
34 when the care given fell below the current level of expected performance of practitioners or systems.  
35 Preventability was also assessed on a 6-point Likert scale with almost no evidence (1), slight to  
36 modest evidence (2), modest evidence, but borderline (3), modest to strong evidence (4), strong  
37 evidence (5) or almost certain evidence (6) of preventability. A score of 4-6 indicated that the  
38 reviewer assessed the AE as having a greater than 50% chance of being potentially preventable.  
39

40 Furthermore, for each patient the following characteristics were registered: gender, age,  
41 length of hospital stay, urgency of admission, whether patients were terminally ill prior to the  
42 admission, the number of involved medical specialists, department of admission, type of procedure  
43 and co-morbidity. The latter was divided in no, minor, moderate and severe co-morbidity, and was  
44 assessed by the experts after careful review of the information in the patient record. Also, one  
45 organizational characteristic (type of hospital: university, tertiary teaching, or general) and one AE  
46 characteristic (weekend or holiday at the time of the AE) were registered.  
47

48 When an AE was medication related (ADE), the following additional characteristics were  
49 registered by the experts: name and type of medication involved, medication phase, a description of  
50 the ADE, and whether the ADE possibly contributed to the patients' death. The medication phases  
51 were classified into ordering, transcribing, dispensing, administering and monitoring.<sup>26,27</sup> The possible  
52  
53  
54  
55  
56  
57  
58  
59  
60



1  
2  
3 contribution to the patients' death was only registered for ORADEs with 'medication' as a main cause  
4 of the event and not for ADEs with 'medication' as a sub cause.  
5

6 All data were entered into a national AE database, specifically designed for the AE studies.  
7

### 8 **Review procedure ORADEs**

9 For our study, we used the national AE database to identify ORADEs (Figure 1). One researcher (BS)  
10 conducted the screening of the database and retrieved several pre-selected variables: (1) AEs with  
11 the main classification cause 'medication' as well as AEs with 'medication' as a sub cause and (2) AEs  
12 with 'analgesics' as involved medication. Furthermore, two free-text fields were selected: the  
13 summary of the AEs and the preventability assessment. A second researcher (MM) independently  
14 double checked the selection procedure.  
15

16 All identified ORADEs, were then classified by BS on type of opioid involved using the World  
17 Health Organization Anatomical Therapeutic Chemical (WHO ATC) classification.<sup>28</sup> For the  
18 preventable ORADEs, the type of medication error was classified according to a data driven analysis  
19 of the free-text summaries of the ADEs. The classification of ORADEs was double checked by two  
20 senior researchers (JK & IJ) and any discrepancies were resolved by consensus.  
21  
22  
23  
24

### 25 **Outcomes**

26 To provide insight into the nature of the ORADEs, each ORADE case was summarized by gender, age  
27 of the patient (categorized in steps of 10 years for privacy reasons), type of opioid involved,  
28 attributable factors and preventability. When the ORADE was preventable, then the type of  
29 medication error and medication phase was also described. Besides, we conducted also a  
30 comparison between preventable and non-preventable ORADEs to identify risk factors.  
31  
32  
33

### 34 **Data analysis**

35 Only descriptive statistics were used in this study. Descriptives are presented as median (age and  
36 length of hospital stay) or frequency (gender, comorbidity, type of opioid and attributable factor,  
37 etc.). Patient and hospital characteristics are presented on a patient level and ORADE characteristics  
38 are presented on AE level. Inter-rater reliability among nurses and physicians was addressed in terms  
39 of positive and negative agreement frequencies.<sup>29</sup> All analyses were conducted using STATA version  
40 14.1 (StataCorp, TX) and double checked by a second researcher (MM) and a statistician (PS).  
41  
42  
43

## 44 **RESULTS**

45 In total, 10,917 records were screened during the three AE studies. The patient records of discharged  
46 and deceased patients were equally distributed among male and female patients. Most patients  
47 were hospitalized for a non-elective procedure (Table 1). In 1150 patient records, at least one AE was  
48 detected, with a total of 1240 AEs. When detecting the adverse events, positive agreement between  
49 physicians varied between 53.4-63.3%, for assessing the preventability positive agreement between  
50 physicians varied between 71.4-73.3%. Overall, agreement frequencies were moderate. More  
51 detailed information about the inter-rater reliability is presented in Supplemental Table 1.  
52  
53  
54  
55

### 56 **Opioid related ADEs**

57 Of 1240 AEs, 357 (29%) were medication related (ADEs). In 28 (8%) ADEs, opioids were involved.  
58 These ADEs are summarized in detail in Box 1, and included 24 ADEs with 'medication' as a main  
59 cause and four ADEs with 'medication' as a sub cause. The ORADEs occurred in 27 patients; one  
60

1  
2  
3 patient experienced two ORADEs. Most patients with ORADEs involved females (59%). Median age of  
4 the patients was 76 years (Inter Quartile Range (IQR): 66-83) and median length of hospital stay was  
5 7 days (IQR: 4-16). Most patients had moderate to significant co-morbidity (70%) and had three  
6 medical specialists during the admission (78%) (Table 2).  
7  
8

#### 9 **Nature of opioid related ADEs: preventability**

10 According to the experts, 11 (39%) out of the 28 ORADEs were considered as potentially preventable  
11 (Table 3). Non-preventable (31%) ORADEs occurred slightly more during weekends and holidays than  
12 preventable ADEs (18%). Moreover, most preventable and non-preventable ORADEs occurred during  
13 dayshifts (8am-5pm).  
14  
15

#### 16 **Nature of opioid related ADEs: medication errors & phase**

17 Of the 11 potentially preventable ORADEs, 10 (91%) were caused by dosing errors of which six during  
18 the prescribing phase (cases #1, #3, #7, #8, #9, #10) and four during the administration phase (cases  
19 #2, #4, #5, #6) (Box 1). Of the ten dosing errors, six occurred in elderly patients ( $\geq 70$  years) (cases #1,  
20 #3, #4, #5, #8, #9), and two around the patients' discharge (cases #2, #7). The remaining one  
21 preventable ORADE (#11) was related to incorrect decision making. Finally, as assessed by the  
22 experts, four preventable ORADEs possibly contributed to the death of the patient (cases #5, #6, #8,  
23 #9).  
24  
25  
26  
27  
28

#### 29 **Nature of opioid related ADEs: attributable factors**

30 The attributable factors involved in ORADEs were care (knowledge, skills, monitoring, verification,  
31 and coordination of care) and patient related (co-morbidity, age, a demanding patient or a patient  
32 with an intellectual disability) (Table 3). Of preventable ORADEs, 8 were care related and 6 were  
33 patient related. For non-preventable ORADEs, 3 were care related and 10 were patient related.  
34 However, in 3 of the cases of non-preventable ORADEs, the attributable factors could not be  
35 assessed by the experts due to insufficient information in the patient records.  
36  
37  
38

#### 39 **Nature of opioid related ADEs: medication involved**

40 Eight out of the eleven preventable ADEs occurred with opioids with ATC code N02AA which are  
41 morphine and oxycodone (Table 3). Non-preventable ORADEs occurred with opioids mainly with ATC  
42 code N02AA (morphine and oxycodone, 53%).  
43  
44  
45

## 46 **DISCUSSION**

47 In three national patient record studies with 4 years intervals, we found 28 ADEs caused by opioids.  
48 These ADEs correspond with 8% of all identified ADEs and 0.3% of all studied patient records. Eleven  
49 of the 28 opioid related ADEs (ORADEs) (39%) were assessed as potentially preventable, involving  
50 mostly morphine and oxycodone. Dosing errors, during the prescription and administration phase  
51 were the most common cause of preventable ORADEs, and occurred most often in elderly patients.  
52 Four preventable ORADEs probably contributed to the patients' death. Finally, attributable factors  
53 for the ADEs were mostly care and patient related.  
54  
55

56 In this study, the percentage of ORADEs of all patient records (0.3%) was low, also in  
57 comparison with previously conducted ORADE studies that focused on large populations (11-  
58 14%).<sup>10,11,15</sup> However, two of these studies were based on large databases and all involved surgical  
59 patients who often receive opioids post-operative. We focused on a broad hospitalized patient  
60

1  
2  
3 population, both surgical and non-surgical. Furthermore, the difference in ORADE occurrence might  
4 be explained by differences in the used ADE definition. For example, instead of using all ORADEs, i.e.  
5 including side-effects of opioids, in our study only ADEs that resulted in severe patient harm were  
6 included. This means that ADEs resulted in prolongation of hospital stay, temporary or permanent  
7 disability or death. Furthermore, only ADEs with a causality likelihood score of equal or greater than  
8 4 were included, which means that the experts indicated an ADE as having a greater than 50%  
9 chance of being caused by healthcare. Should we have selected the cases with causality likelihood  
10 scores of 1-3 as well, then we could determine at least 2500 additional cases on whether medication  
11 and opioids were related.  
12

13  
14  
15 In line with previous studies,<sup>7,13,14,16</sup> we found that dosing errors during prescribing and  
16 administering were the main cause of preventable ORADEs. Furthermore, 60% of the dosing errors in  
17 our study occurred in elderly patients ( $\geq 70$  years). In general, prescribing medication for elderly  
18 patients is challenging since polypharmacy, multi-morbidity and altered pharmacokinetics and  
19 pharmacodynamics of drugs are often present. Besides, this population will rapidly increase in the  
20 upcoming years. Specifically related to opioids, physicians also need to be aware of the higher  
21 sensitivity of elderly patients to the effects of opioids,<sup>30</sup> and balancing between minimizing the risk of  
22 addiction and side-effects while effectively relieving pain.<sup>31,32</sup> Taking into account all these factors  
23 while prescribing, demands a lot from physicians during their busy daily hospital practice. A clinical  
24 decision support system (CDSS), can help physicians in this complex task by showing warnings and  
25 advices during prescribing, for example showing the most appropriate choice of medication for a  
26 given condition and/or by providing dosing recommendations. CDSS has shown to effectively reduce  
27 prescribing errors among hospitalized elderly patients<sup>33,34</sup> and errors with medications of which the  
28 therapeutic effects are fast, such as opioids.<sup>35</sup> Furthermore, a CDSS can also be effective in predicting  
29 which patients are at risk for ORADEs. Using retrospective data from gastro-intestinal surgical  
30 patients, Minkowitz et al. (2014) developed a risk-scoring model to identify patients with a high risk  
31 for experiencing an ORADE based on their clinical and demographic profiles.<sup>36</sup> If developed  
32 specifically for elderly inpatients, such a prediction model could help physicians in determining the  
33 most appropriate and safe pain management strategy for these vulnerable patients. Finally, a CDSS  
34 could also be used to identify patients who might be suitable for pre-emptive genotyping, which  
35 involves metabolic testing prior to prescribing.<sup>37</sup> Patients with high levels of pain despite using high  
36 doses of pain medication or patients that experience severe side-effects while using common dosing  
37 schedules may especially benefit from such an intervention.<sup>38</sup>  
38

39  
40 Administering opioids is a task usually conducted by nurses. The dosing errors in our study  
41 were mostly related to injectable opioids. Error prone activities, such as calculating the concentration  
42 and administration rate,<sup>13,16</sup> require that nurses have sufficient arithmetic knowledge and follow the  
43 protocol for safe preparation and administration of injectable medication. However, in daily practice,  
44 some nurses have math anxiety and on average arithmetic knowledge of nursing students seems  
45 moderate.<sup>39,40</sup> Besides, nurse compliance with protocols for safe administration of injectable  
46 medication is considered low (around 20%)<sup>41,42</sup> and needs further attention. An intervention which  
47 might help to reduce dosing errors during opioid administration is the use of smart infusion pumps.  
48 These pumps have integrated medication libraries which allow nurses to set the pump automatically  
49 to the right administration rate during administration. By doing so, the administration rate of smart  
50 pumps can be seen as a double check of the nurses' own calculation. Smart pumps seem also  
51 effective in reducing programming errors.<sup>43</sup> Furthermore, educational programs for nurses about  
52  
53  
54  
55  
56  
57  
58  
59  
60

1  
2  
3 brand and generic names and pharmacology of opioids or side-effects might increase their  
4 knowledge and awareness of risks related to dosing during the administration of opioids.<sup>44-46</sup>

5 Overall, we think the ORADE frequency of 8% of all ADEs and 0.3% of all studied patient  
6 records found in our study is low and acceptable. However, although the frequency is low, the risk of  
7 serious consequences is high. Thus, new contributions to prevent ORADEs in future hospitalized  
8 patients need to be identified. Using the Safety-2 perspective may offer new opportunities to do so.<sup>47</sup>  
9 In order to understand what happened when an adverse (drug) event occurred, it is also necessary to  
10 understand how work is done when the process goes well.<sup>48</sup> Since healthcare processes have become  
11 more complex nowadays, it may be helpful to visualize the current variable practice of prescribing  
12 and administering opioids from a multi-stakeholder perspective.<sup>49</sup>

### 16 17 **Strengths and limitations**

18 Opioids are in the top ten of drug types that causes fatal medication errors.<sup>8</sup> Hence, focusing on the  
19 detailed description of the nature of ORADEs was important and necessary. Another strength of this  
20 study is that it was based on a comprehensive ADE detection method and conducted in a broad  
21 sample of all hospital admissions. Most previous studies, which described the nature of ORADEs, are  
22 based on medication related incident reports. Furthermore, data were gathered over an extended  
23 period of time within a randomly selected sample of one third of all Dutch hospitals.

24 This study also has some limitations. Firstly, in all three AE studies, the population consisted  
25 of relatively many older and deceased patients. Therefore, it is not possible to generalize the results  
26 to all Dutch hospital population. To make the study sample more representative for the Dutch  
27 hospital population, weighting the results (i.e. correcting for type of hospital, study period and  
28 discharge status) would be a solution which is used in previous studies of our research group.  
29 However, since the total amount of ORADEs was low, we chose not to weight our results as this had  
30 little effect and makes interpretation difficult. Secondly, due to this low number of ORADEs, it was  
31 not possible to compare the events over the three study periods. Therefore, we cannot conclude  
32 whether the low number is a positive finding, and if the occurrence of ORADEs increased or  
33 decreased over time. Thirdly, our post-hoc analysis was based on the information previously  
34 recorded by the experts in an AE database, and on the assessment conducted by these physicians.  
35 Therefore, interpreting the assessment of preventability was difficult for us in one case, resulting in a  
36 non-preventable ORADE. Besides, the retrospective interpretation can also be biased by temporal  
37 views. While the current opinion is that prescribing opioids should be minimized due to the harm of  
38 opioids, this changed throughout the years and may not have been recognized 15 years ago, when  
39 the focus was mainly on alleviating suffering of pain.

### 47 48 **CONCLUSION**

49 Only 8% of ADEs identified in our sample were related to opioids, 0.3% of all studied patient records.  
50 Although the frequency is low, the risk of serious consequences is high. We recommend to use our  
51 findings to increase awareness among physicians and nurses. Future interventions should focus on  
52 safe dosing of opioids when prescribing and administering, especially in elderly patients.  
53  
54  
55  
56  
57  
58  
59  
60

1  
2  
3 **Acknowledgements** We would like to thank all participating hospitals and independent nurses and  
4 physicians for their cooperation during the data collection on the three Dutch adverse event studies.  
5 We also thank Peter Spreeuwenberg, MSc for double checking the statistical analyses and Catherine  
6 Combee - Duffy, MANP for improving the readability of this article. This study was funded by the  
7 Dutch Ministry of Health, Welfare, and Sport.  
8  
9

10  
11 **Contributors** BS, MM, JK, ML, MdB, and CW designed the study and developed the study protocol. BS  
12 and MM organized the selection and classification of ORADEs. JK and IJ double checked this  
13 classification. BS and MM performed statistical analyses and interpreted the analytical results. BS, JK,  
14 and IJ wrote the manuscript. MdB, and CW supervised the study. All authors made critical revisions  
15 and approved the final version of the manuscript.  
16  
17

18 **Funding** This study was funded by the Dutch Ministry of Health, Welfare, and Sports.  
19  
20

21 **Competing interests** None declared.  
22  
23

24 **Data sharing statement** No additional data are available.  
25  
26

27 **Patient statement** Patients or the public were not involved in the design, or conduct, or reporting, or  
28 dissemination plans of our research.  
29

30 **Open Access** This is an Open Access article distributed in accordance with the Creative Commons  
31 Attribution Non Commercial (CC BY-NC 4.0) license, which permits others to distribute, remix, adapt,  
32 build upon this work non-commercially, and license their derivative works on different terms,  
33 provided the original work is properly cited and the use is non-commercial. See:  
34 <http://creativecommons.org/licenses/by-nc/4.0/>  
35  
36  
37  
38  
39  
40  
41  
42  
43  
44  
45  
46  
47  
48  
49  
50  
51  
52  
53  
54  
55  
56  
57  
58  
59  
60

## REFERENCES

1. Schepens MHJ, Leusink M, de Vries SE, et al. [Increase in opioid prescribing in extramural care in the Netherlands: assessment of use and prescription behaviour, based on claims data]. *Ned Tijdschr Geneeskd.* 2019;163.
2. Lyden J, Binswanger IA. The United States opioid epidemic. *Semin Perinatol.* 2019;43(3):123-31.
3. AMA. Physicians' progress to reverse the nation's opioid epidemic.: American Medical Association; 2018. Available at: <https://www.ama-assn.org/sites/default/files/media-browser/public/physicians/patient-care/opioid-task-force-progress-report.pdf>. Accessed August 8, 2018.
4. Overheid.nl. Geneesmiddelenbeleid. Den Haag, The Netherlands: Overheid.nl; 2019. Available at: <https://zoek.officielebekendmakingen.nl/kst-29477-537.html>. Accessed March 19, 2019.
5. Laatikainen O, Miettunen J, Sneek S, et al. The prevalence of medication-related adverse events in inpatients-a systematic review and meta-analysis. *Eur J Clin Pharmacol.* 2017;73(12):1539-49.
6. Mihajlovic S, Gauthier J, MacDonald E. Patient characteristics associated with adverse drug events in hospital: an overview of reviews. *Can J Hosp Pharm.* 2016;69(4):294-300.
7. Mc Donnell C. Opioid medication errors in pediatric practice: four years' experience of voluntary safety reporting. *Pain Res Manag.* 2011;16(2):93-8.
8. Saedder EA, Brock B, Nielsen LP, et al. Identifying high-risk medication: a systematic literature review. *Eur J Clin Pharmacol.* 2014;70(6):637-45.
9. Kane-Gill SL, Rubin EC, Smithburger PL, et al. The cost of opioid-related adverse drug events. *J Pain Palliat Care Pharmacother.* 2014;28(3):282-93.
10. Oderda GM, Gan TJ, Johnson BH, et al. Effect of opioid-related adverse events on outcomes in selected surgical patients. *J Pain Palliat Care Pharmacother.* 2013;27(1):62-70.
11. Kessler ER, Shah M, Gruschkus SK, et al. Cost and quality implications of opioid-based postsurgical pain control using administrative claims data from a large health system: opioid-related adverse events and their impact on clinical and economic outcomes. *Pharmacotherapy.* 2013;33(4):383-91.
12. Bates DW, Cullen DJ, Laird N, et al. Incidence of adverse drug events and potential adverse drug events. Implications for prevention. ADE Prevention Study Group. *Jama.* 1995;274(1):29-34.
13. Doherty C, Mc Donnell C. Tenfold medication errors: 5 years' experience at a university-affiliated pediatric hospital. *Pediatrics.* 2012;129(5):916-24.
14. Heneka N, Shaw T, Rowett D, et al. Opioid errors in inpatient palliative care services: a retrospective review. *BMJ Support Palliat Care.* 2018;8(2):175-79.
15. Shafi S, Collinsworth AW, Copeland LA, et al. Association of opioid-related adverse drug events with clinical and cost outcomes among surgical patients in a large integrated health care delivery system. *JAMA Surg.* 2018;153(8):757-63.
16. Dy SM, Shore AD, Hicks RW, et al. Medication errors with opioids: results from a national reporting system. *J Opioid Manag.* 2007;3(4):189-94.
17. Cousins DH, Gerrett D, Warner B. A review of medication incidents reported to the national reporting and learning system in England and Wales over 6 years (2005-2010). *Br J Clin Pharmacol.* 2012;74(4):597-604.
18. Noble DJ, Pronovost PJ. Underreporting of patient safety incidents reduces health care's ability to quantify and accurately measure harm reduction. *J Patient Saf.* 2010;6(4):247-50.
19. Yung HP, Yu S, Chu C, et al. Nurses' attitudes and perceived barriers to the reporting of medication administration errors. *J Nurs Manag.* 2016;24(5):580-8.

- 1  
2  
3 20. Zegers M, de Bruijne MC, Wagner C, et al. Adverse events and potentially preventable deaths in  
4 Dutch hospitals: results of a retrospective patient record review study. *Qual Saf Health Care*.  
5 2009;18(4):297-302.  
6  
7 21. Baines RJ, Langelaan M, de Bruijne MC, et al. Changes in adverse event rates in hospitals over  
8 time: a longitudinal retrospective patient record review study. *BMJ Qual Saf*. 2013;22(4):290-8.  
9  
10 22. Baines R, Langelaan M, de Bruijne M, et al. How effective are patient safety initiatives? A  
11 retrospective patient record review study of changes to patient safety over time. *BMJ Qual Saf*.  
12 2015;24(9):561-71.  
13  
14 23. Langelaan M, De Bruijne MC, Baines RJ, et al. Dutch adverse event study 2011/2012 Utrecht:  
15 NIVEL/EMGO+; 2013. Available at:  
16 [https://www.nivel.nl/sites/default/files/bestanden/monitor\\_zorggerelateerde\\_schade\\_2011\\_2012.p](https://www.nivel.nl/sites/default/files/bestanden/monitor_zorggerelateerde_schade_2011_2012.pdf)  
17 [df](https://www.nivel.nl/sites/default/files/bestanden/monitor_zorggerelateerde_schade_2011_2012.pdf). Accessed December 12, 2018.  
18  
19 24. Baines RJ, Langelaan M, de Bruijne MC, et al. Is researching adverse events in hospital deaths a  
20 good way to describe patient safety in hospitals: a retrospective patient record review study. *BMJ*  
21 *Open*. 2015;5(7):e007380.  
22  
23 25. Damen NL, Baines R, Wagner C, et al. Medication-related adverse events during hospitalization: a  
24 retrospective patient record review study in The Netherlands. *Pharmacoepidemiol Drug Saf*.  
25 2017;26(1):32-9.  
26  
27 26. Morimoto T, Sakuma M, Matsui K, et al. Incidence of adverse drug events and medication errors  
28 in Japan: the JADE study. *J Gen Intern Med*. 2011;26(2):148-53.  
29  
30 27. WHO. Medication errors: technical series on safer primary care. Geneva: World Health  
31 Organization; 2016. Available at:  
32 <http://apps.who.int/iris/bitstream/handle/10665/252274/9789241511643-eng.pdf?sequence=1>.  
33 Accessed July 12, 2018.  
34  
35 28. WHO. ATC/DDD Index 2017. Available at: [https://www.whocc.no/atc\\_ddd\\_index/?code=N02A](https://www.whocc.no/atc_ddd_index/?code=N02A).  
36 Accessed July 10, 2018.  
37  
38 29. de Vet HC, Mookkink LB, Terwee CB, et al. Clinicians are right not to like Cohen's kappa. *Bmj*.  
39 2013;346:f2125.  
40  
41 30. Huang AR, Mallet L. Prescribing opioids in older people. *Maturitas*. 2013;74(2):123-9.  
42  
43 31. Aronson JK. Balanced prescribing - principles and challenges. *Br J Clin Pharmacol*. 2012;74(4):566-  
44 72.  
45  
46 32. Wallwork RS, Chipidza FE, Stern TA. Obstacles to the prescription and use of opioids. *Prim Care*  
47 *Companion CNS Disord*. 2016;18(1):doi: 10.4088/PCC.15f01900.  
48  
49 33. Scott IA, Pillans PI, Barras M, et al. Using EMR-enabled computerized decision support systems to  
50 reduce prescribing of potentially inappropriate medications: a narrative review. *Ther Adv Drug Saf*.  
51 2018;9(9):559-73.  
52  
53 34. Clyne B, Bradley MC, Hughes C, et al. Electronic prescribing and other forms of technology to  
54 reduce inappropriate medication use and polypharmacy in older people: a review of current  
55 evidence. *Clin Geriatr Med*. 2012;28(2):301-22.  
56  
57 35. Durieux P, Trinquart L, Colombet I, et al. Computerized advice on drug dosage to improve  
58 prescribing practice. *Cochrane Database Syst Rev*. 2008(3):Cd002894.  
59  
60 36. Minkowitz HS, Scranton R, Gruskus SK, et al. Development and validation of a risk score to  
identify patients at high risk for opioid-related adverse drug events. *J Manag Care Spec Pharm*.  
2014;20(9):948-58.

- 1  
2  
3 37. Hinderer MA-Ohoo, Boeker M, Wagner SA, et al. Integrating clinical decision support systems for  
4 pharmacogenomic testing into clinical routine - a scoping review of designs of user-system  
5 interactions in recent system development. (1472-6947 (Electronic)).  
6  
7 38. Agarwal D, Udoji MA, Trescot A. Genetic testing for opioid pain management: a primer. *Pain Ther.*  
8 2017;6(1):93-105.  
9  
10 39. Simonsen BO, Daehlin GK, Johansson I, et al. Differences in medication knowledge and risk of  
11 errors between graduating nursing students and working registered nurses: comparative study. *BMC*  
12 *Health Serv Res.* 2014;14:580.  
13  
14 40. Williams B, Davis S. Maths anxiety and medication dosage calculation errors: A scoping review.  
15 *Nurse Educ Pract.* 2016;20:139-46.  
16  
17 41. Schilp J, Boot S, de Blok C, et al. Protocol compliance of administering parenteral medication in  
18 Dutch hospitals: an evaluation and cost estimation of the implementation. *BMJ Open.*  
19 2014;4(12):e005232.  
20  
21 42. Schutijser B, Klopotoska JE, Jongerden I, et al. Nurse compliance with a protocol for safe  
22 injectable medication administration: comparison of two multicentre observational studies. *BMJ*  
23 *Open.* 2018;8(1):e019648.  
24  
25 43. Ohashi K, Dalleur O, Dykes PC, et al. Benefits and risks of using smart pumps to reduce  
26 medication error rates: a systematic review. *Drug Saf.* 2014;37(12):1011-20.  
27  
28 44. Murnion BP, Gnjidic D, Hilmer SN. Prescription and administration of opioids to hospital in-  
29 patients, and barriers to effective use. *Pain Med.* 2010;11(1):58-66.  
30  
31 45. Jho HJ, Kim Y, Kong KA, et al. Knowledge, practices, and perceived barriers regarding cancer pain  
32 management among physicians and nurses in Korea: a nationwide multicenter survey. *PLoS One.*  
33 2014;9(8):e105900.  
34  
35 46. AlReshidi N, Long T, Darvill A. A systematic review of the impact of educational programs on  
36 factors that affect nurses' post-operative pain management for children. *Compr Child Adolesc Nurs.*  
37 2018;41(1):9-24.  
38  
39 47. Furniss D, Lyons I, Franklin BD, et al. Procedural and documentation variations in intravenous  
40 infusion administration: a mixed methods study of policy and practice across 16 hospital trusts in  
41 England. *BMC Health Serv Res.* 2018;18(1):270.  
42  
43 48. Hollnagel E, Wears R, Braithwaite J. From safety-I to safety-II: A white paper. The Resilient  
44 Healthcare Net: published simultaneously by the University of Southern Denmark, University of  
45 Florida, USA, and Macquarie University, Australia; 2015.  
46  
47 49. Clay-Williams R, Hounsgaard J, Hollnagel E. Where the rubber meets the road: using FRAM to  
48 align work-as-imagined with work-as-done when implementing clinical guidelines. *Implement Sci.*  
49 2015;10:125.  
50  
51  
52  
53  
54  
55  
56  
57  
58  
59  
60



**Table 1. Patient and hospital characteristics of all reviewed patient records, including adverse events per study period and discharge status.**

|                                                  | Study period and discharge status |                 |                   |                 |                  |
|--------------------------------------------------|-----------------------------------|-----------------|-------------------|-----------------|------------------|
|                                                  | 2008                              |                 | 2011/2012         |                 | 2015/2016        |
| <b>Hospital characteristics †</b>                | <b>Discharged</b>                 | <b>Deceased</b> | <b>Discharged</b> | <b>Deceased</b> | <b>Deceased</b>  |
| <b>Number of patient records, n</b>              | 2016                              | 2007            | 2023              | 2025            | 2846             |
| <b>General hospital, n records (%)</b>           | 1013 (50)                         | 1015 (51)       | 794 (39)          | 813 (40)        | 1197 (42)        |
| <b>Tertiary teaching hospital, n records (%)</b> | 608 (30)                          | 593 (30)        | 822 (41)          | 820 (40)        | 1052 (37)        |
| <b>Academic hospital, n records (%)</b>          | 395 (20)                          | 399 (20)        | 407 (20)          | 392 (19)        | 597 (21)         |
|                                                  | <b>2008</b>                       |                 | <b>2011/2012</b>  |                 | <b>2015/2016</b> |
| <b>Patient characteristics †</b>                 | <b>Discharged</b>                 | <b>Deceased</b> | <b>Discharged</b> | <b>Deceased</b> | <b>Deceased</b>  |
| <b>Male sex, n (%)</b>                           | 999 (50)                          | 1067 (53)       | 1027 (51)         | 1062 (52)       | 1524 (54)        |
| <b>Age (years), median (IQR)</b>                 | 62 (47-75)                        | 77 (67-84)      | 63 (48-75)        | 77 (68-84)      | 77 (68-85)       |
| <b>Length of stay (days), median (IQR)</b>       | 4 (2-8)                           | 7 (3-14)        | 3 (2-7)           | 6 (2-13)        | 4 (1-11)         |
| <b>Non-elective admission, n (%)</b>             | 1038 (51)                         | 1708 (85)       | 1063 (53)         | 1775 (88)       | 2496 (88)        |
| <b>Admission department, n (%)</b>               |                                   |                 |                   |                 |                  |
| Surgery                                          | 481 (24)                          | 276 (14)        | 472 (23)          | 239 (12)        | 340 (12)         |
| Cardiology                                       | 290 (14)                          | 291 (15)        | 272 (13)          | 247 (12)        | 360 (13)         |
| Internal medicine                                | 364 (18)                          | 599 (30)        | 365 (18)          | 597 (29)        | 876 (31)         |
| Orthopaedics                                     | 226 (11)                          | 33 (2)          | 225 (11)          | 26 (1)          | 29 (1)           |
| Neurology                                        | 150 (7)                           | 219 (11)        | 133 (7)           | 193 (10)        | 269 (9)          |
| Lung diseases                                    | 117 (6)                           | 259 (13)        | 126 (6)           | 300 (15)        | 347 (12)         |
| Urology                                          | 109 (5)                           | 18 (1)          | 111 (5)           | 28 (1)          | 23 (1)           |
| Other                                            | 279 (14)                          | 312 (16)        | 319 (16)          | 395 (20)        | 602 (21)         |
| <b>Underwent invasive procedure, n (%)</b>       | 925 (46)                          | 423 (21)        | 918 (45)          | 403 (20)        | 461 (16)         |
| <b>Adverse event occurrence §¶</b>               |                                   |                 |                   |                 |                  |
| AE, n (%)                                        | 161 (8)                           | 351 (16)        | 157 (8)           | 259 (12)        | 312 (10)         |
| ADE, n (% within population)                     | 37 (2)                            | 93 (4)          | 40 (2)            | 76 (4)          | 111 (4)          |
| ADE, n (% within adverse event)                  | 37 (23)                           | 93 (27)         | 40 (25)           | 76 (29)         | 111 (36)         |
| ORADE, n (% within population)                   | 1 (0)                             | 7 (0)           | 2 (0)             | 8 (0)           | 10 (0)           |
| ORADE, n (% within ADEs)                         | 1 (3)                             | 7 (8)           | 2 (5)             | 8 (11)          | 10 (9)           |

† Presented on patient record level.  
§ Presented on AE level.  
¶ Total number of AEs: 1240, total number of ADEs: 357, total number of opioid related ADEs: 28  
AE = Adverse event, ADE = Adverse drug event, ORADE = Opioid related adverse drug event, IQR = Interquartile range

| <b>Table 2. Characteristics of patients (n=27) with ORADEs (n=28)<sup>†</sup></b>                                                 |            |
|-----------------------------------------------------------------------------------------------------------------------------------|------------|
| <b>Patient characteristics</b>                                                                                                    |            |
| <b>Patients with an ADE, n</b>                                                                                                    | 27         |
| <b>Male sex, n (%)</b>                                                                                                            | 11 (41)    |
| <b>Age, median years (IQR)</b>                                                                                                    | 76 (66-83) |
| <b>Length of stay, median days (IQR)</b>                                                                                          | 7 (4-16)   |
| <b>Non-elective admission, n (%)</b>                                                                                              | 19 (70)    |
| <b>Terminally ill prior to admission, n (%)</b>                                                                                   | 6 (22)     |
| <b>Total number of medical specialists</b>                                                                                        |            |
| 0, n (%)                                                                                                                          | 0 (0)      |
| 1, n (%)                                                                                                                          | 4 (15)     |
| 2, n (%)                                                                                                                          | 2 (7)      |
| 3, n (%)                                                                                                                          | 21 (78)    |
| <b>Primary specialisation during admission</b>                                                                                    |            |
| Surgical, n (%)                                                                                                                   | 7 (26)     |
| Non-surgical, n (%)                                                                                                               | 20 (74)    |
| <b>Underwent invasive procedure, n (%)</b>                                                                                        | 9 (33)     |
| <b>Co-morbidity<sup>§</sup></b>                                                                                                   |            |
| No co-morbidity, n (%)                                                                                                            | 0 (0)      |
| Minor co-morbidity, n (%)                                                                                                         | 3 (11)     |
| Moderate co-morbidity, n (%)                                                                                                      | 5 (19)     |
| Significant co-morbidity, n (%)                                                                                                   | 19 (70)    |
| <sup>†</sup> Presented on patient level.                                                                                          |            |
| <sup>§</sup> The level of co-morbidity was assessed by the experts after careful review of the information in the patient record. |            |
| ADE = Adverse drug event, ORADEs = Opioid related adverse drug events                                                             |            |

| <b>Table 3. Clinical context of ORADEs (n=28)<sup>†</sup></b>                                                                                                                                                                                                                                                                                                                                                                                                                                                                                                                                                                                                                                                                                                                                                                                                    |                                                    |                                                |
|------------------------------------------------------------------------------------------------------------------------------------------------------------------------------------------------------------------------------------------------------------------------------------------------------------------------------------------------------------------------------------------------------------------------------------------------------------------------------------------------------------------------------------------------------------------------------------------------------------------------------------------------------------------------------------------------------------------------------------------------------------------------------------------------------------------------------------------------------------------|----------------------------------------------------|------------------------------------------------|
| <b>Clinical context</b>                                                                                                                                                                                                                                                                                                                                                                                                                                                                                                                                                                                                                                                                                                                                                                                                                                          | <b>Non-preventable<sup>§</sup><br/>ADEs (n=17)</b> | <b>Preventable<sup>§</sup><br/>ADEs (n=11)</b> |
| <b>Type of hospital</b>                                                                                                                                                                                                                                                                                                                                                                                                                                                                                                                                                                                                                                                                                                                                                                                                                                          |                                                    |                                                |
| University, n ADEs (%)                                                                                                                                                                                                                                                                                                                                                                                                                                                                                                                                                                                                                                                                                                                                                                                                                                           | 1 (6)                                              | 1 (9)                                          |
| Tertiary teaching, n ADEs (%)                                                                                                                                                                                                                                                                                                                                                                                                                                                                                                                                                                                                                                                                                                                                                                                                                                    | 6 (35)                                             | 4 (36)                                         |
| General, n ADEs (%)                                                                                                                                                                                                                                                                                                                                                                                                                                                                                                                                                                                                                                                                                                                                                                                                                                              | 10 (59)                                            | 6 (55)                                         |
| <b>Weekend or National holiday (yes), n (%)</b>                                                                                                                                                                                                                                                                                                                                                                                                                                                                                                                                                                                                                                                                                                                                                                                                                  | 5 (31)                                             | 2 (18)                                         |
| <b>Moment</b>                                                                                                                                                                                                                                                                                                                                                                                                                                                                                                                                                                                                                                                                                                                                                                                                                                                    |                                                    |                                                |
| 8am-5pm, n (%)                                                                                                                                                                                                                                                                                                                                                                                                                                                                                                                                                                                                                                                                                                                                                                                                                                                   | 6 (35)                                             | 5 (45)                                         |
| 5pm-11pm, n (%)                                                                                                                                                                                                                                                                                                                                                                                                                                                                                                                                                                                                                                                                                                                                                                                                                                                  | 3 (18)                                             | 0 (0)                                          |
| 11pm-8am, n (%)                                                                                                                                                                                                                                                                                                                                                                                                                                                                                                                                                                                                                                                                                                                                                                                                                                                  | 2 (12)                                             | 3 (27)                                         |
| Cannot be assessed, n (%)                                                                                                                                                                                                                                                                                                                                                                                                                                                                                                                                                                                                                                                                                                                                                                                                                                        | 6 (35)                                             | 3 (27)                                         |
| <b>Type of Opioid (ATC code)</b>                                                                                                                                                                                                                                                                                                                                                                                                                                                                                                                                                                                                                                                                                                                                                                                                                                 |                                                    |                                                |
| Opioid anesthetics (N01AH03), n (%)                                                                                                                                                                                                                                                                                                                                                                                                                                                                                                                                                                                                                                                                                                                                                                                                                              | 2 (12)                                             | 1 (9)                                          |
| Natural opium alkaloids (N02AA), n (%)                                                                                                                                                                                                                                                                                                                                                                                                                                                                                                                                                                                                                                                                                                                                                                                                                           | 9 (53)                                             | 8 (73)                                         |
| Natural opium alkaloids and Phenylpiperidine derivatives (N02AA/N02AB, combination), n (%)                                                                                                                                                                                                                                                                                                                                                                                                                                                                                                                                                                                                                                                                                                                                                                       | 1 (6)                                              | 1 (9)                                          |
| Phenylpiperidine derivatives (N02AB), n (%)                                                                                                                                                                                                                                                                                                                                                                                                                                                                                                                                                                                                                                                                                                                                                                                                                      | 2 (12)                                             | 0 (0)                                          |
| Other opioids (N02AX), n (%)                                                                                                                                                                                                                                                                                                                                                                                                                                                                                                                                                                                                                                                                                                                                                                                                                                     | 1 (6)                                              | 0 (0)                                          |
| Drugs used in opioid dependence (N07BC), n (%)                                                                                                                                                                                                                                                                                                                                                                                                                                                                                                                                                                                                                                                                                                                                                                                                                   | 2 (12)                                             | 1 (9)                                          |
| <b>Attributable factors<sup>¶</sup></b>                                                                                                                                                                                                                                                                                                                                                                                                                                                                                                                                                                                                                                                                                                                                                                                                                          |                                                    |                                                |
| Technical, n (%)                                                                                                                                                                                                                                                                                                                                                                                                                                                                                                                                                                                                                                                                                                                                                                                                                                                 | 0 (0)                                              | 0 (0)                                          |
| Care related, n (%)                                                                                                                                                                                                                                                                                                                                                                                                                                                                                                                                                                                                                                                                                                                                                                                                                                              | 3 (19)                                             | 8 (80)                                         |
| Organizational, n (%)                                                                                                                                                                                                                                                                                                                                                                                                                                                                                                                                                                                                                                                                                                                                                                                                                                            | 2 (13)                                             | 4 (40)                                         |
| Patient related, n (%)                                                                                                                                                                                                                                                                                                                                                                                                                                                                                                                                                                                                                                                                                                                                                                                                                                           | 10 (63)                                            | 6 (60)                                         |
| Violation, n (%)                                                                                                                                                                                                                                                                                                                                                                                                                                                                                                                                                                                                                                                                                                                                                                                                                                                 | 0 (0)                                              | 1 (10)                                         |
| Cannot be assessed, n (%)                                                                                                                                                                                                                                                                                                                                                                                                                                                                                                                                                                                                                                                                                                                                                                                                                                        | 3 (19)                                             | 1 (10)                                         |
| Other, n (%)                                                                                                                                                                                                                                                                                                                                                                                                                                                                                                                                                                                                                                                                                                                                                                                                                                                     | 1 (6)                                              | 0 (0)                                          |
| <p><sup>†</sup> Presented on adverse event level.</p> <p><sup>§</sup> Preventability was scored on a 6-point Likert scale: 1 = (almost) no evidence of preventability; 2 = small indications for preventability; 3 = preventability not very likely, less than 50% but 'close call'; 4 = Preventability more than likely, more than 50% but 'close call'; 5 = strong indications for preventability; 6 = (almost) certain indications of preventability. Not preventable ADEs were scored at 1-3, preventable ADEs were scored at 4-6.</p> <p><sup>¶</sup> These variables were missing for 2 patients; one in the preventable group and one in the non-preventable group. Moreover, it was possible to select more than one option for this question.</p> <p>ADE = Adverse drug event, ORADE = Opioid related adverse drug event, IQR = Interquartile range</p> |                                                    |                                                |

| <b>Box 1. Descriptions of the 28 opioid related adverse drug events divided into preventable and non-preventable.</b> |                                                                                                                                                                                                                                                                                                                                                                                                                                                                                   |                                                |
|-----------------------------------------------------------------------------------------------------------------------|-----------------------------------------------------------------------------------------------------------------------------------------------------------------------------------------------------------------------------------------------------------------------------------------------------------------------------------------------------------------------------------------------------------------------------------------------------------------------------------|------------------------------------------------|
| <b>Case</b>                                                                                                           | <b>Description<sup>†</sup></b>                                                                                                                                                                                                                                                                                                                                                                                                                                                    | <b>Preventability score (1-6)<sup>‡§</sup></b> |
| <b>Preventable opioid related ADEs</b>                                                                                |                                                                                                                                                                                                                                                                                                                                                                                                                                                                                   |                                                |
| <i>Cause: Dosing errors</i>                                                                                           |                                                                                                                                                                                                                                                                                                                                                                                                                                                                                   |                                                |
| 1                                                                                                                     | Male, 90-99 years, admitted with pain after a fall. Oxycodone for the pain was unintentionally prescribed twice instead of once and also administered twice. This resulted in drowsiness.                                                                                                                                                                                                                                                                                         | 6                                              |
| 2                                                                                                                     | Male, 60-69 years, suffering from colon cancer and liver metastases, was admitted for optimizing his analgesics medication. On returning from his weekend leave, he was diagnosed with oxycodone intoxication. During hospital stay, he received a too high dose of the opioid antagonist naloxone (1 mg instead of 0,4 mg) which caused confusion and agitation.                                                                                                                 | 6                                              |
| 3                                                                                                                     | Female, 70-79 years, admitted with a pelvic fracture after a fall. A too high dose of oxycodone was prescribed and administered resulting in hypotension and drowsiness. Consequently, she needed to be transferred to the intensive care unit.                                                                                                                                                                                                                                   | 5                                              |
| 4                                                                                                                     | Female, 80-89 years, admitted with malaise after a fall. During her admission she received a too high dose of morphine. In her patient record, the morphine was ordered as 'as needed'. In the medication list, the morphine was ordered '6 times a day'.                                                                                                                                                                                                                         | 5                                              |
| 5                                                                                                                     | Female, 70-79 years, admitted for a plastic surgery. A high dose of administered anesthetic/pain medication (type unknown) caused hypoventilation and a myocardial infarct. The myocardial infarct was discovered too late. She was resuscitated and ventilated. Her death was possibly caused by a hospital acquired pneumonia.                                                                                                                                                  | 5                                              |
| 6                                                                                                                     | Female, 50-59 years, admitted due to an aspiration pneumonia, was administered morphine. The pump mode was set at 13 instead of 8 as ordered. This possibly resulted in an epileptic insult requiring ventilation.                                                                                                                                                                                                                                                                | 5                                              |
| 7                                                                                                                     | Male, 60-69 years, re-admitted to the hospital due to a collapse at home. He was previously hospitalized for treatment of rib fractures and COPD Gold IV. At discharge, the doses of fentanyl and oxycodone had been significantly increased. Monitoring the effects of increasing these opioid doses was not conducted.                                                                                                                                                          | 4                                              |
| 8                                                                                                                     | Female, 80-89 years, admitted with osteoporosis, received at home 5 mg morphine twice daily for her back pain. The dosage was increased to 5 mg 4 times a day during hospital stay. Three days later, a paralytic ileus was discovered. A lower morphine dose was more appropriate for this elderly female.                                                                                                                                                                       | 4                                              |
| 9                                                                                                                     | Female, 80-89 years, admitted with abdominal pain due to a kidney bleeding. She received morphine injections daily, varying from 2-6 injections along with transdermal fentanyl 12 mcg hourly. Severe hypercapnia eventually caused her death.                                                                                                                                                                                                                                    | 4                                              |
| 10                                                                                                                    | Male, 0-9 years, with Down syndrome, was acutely ill due to a laryngitis. He was difficult to ventilate and received antibiotics and sedatives including opioids. He was transferred to another hospital following detubation. Here, his methadone intake was reduced resulting in a delirium. Initially he improved, but one day unexpectedly he was found dead. It is unclear why this patient received methadone, but reducing the methadone intake may have been the problem. | 4                                              |
| <i>Cause: Incorrect decision making</i>                                                                               |                                                                                                                                                                                                                                                                                                                                                                                                                                                                                   |                                                |
| 11                                                                                                                    | Female, 60-69 years, admitted for a laminectomy. Postoperatively she developed an ileus caused by severe constipation aggravated by administered morphine. Macrogol oral suspension instead of an enema was given as treatment, which was insufficient                                                                                                                                                                                                                            | 4                                              |

|                                                   |                                                                                                                                                                                                                                                                                        |   |
|---------------------------------------------------|----------------------------------------------------------------------------------------------------------------------------------------------------------------------------------------------------------------------------------------------------------------------------------------|---|
|                                                   | to resolve the ileus and colon perforation occurred. Untreatable abdominal septic complications followed.                                                                                                                                                                              |   |
| <b><i>Non-preventable opioid related ADEs</i></b> |                                                                                                                                                                                                                                                                                        |   |
| 12                                                | Female, 80-89 years, admitted due to a total knee replacement. Postoperatively, drowsiness, hypotension and oliguria occurred, possibly caused by the epidural medication sufentanil. This may have led to a small asymptomatic myocardial infarct.                                    | 3 |
| 13                                                | Male, 80-89 years, admitted with a perforated stomach ulcer and known stomach cancer. His extreme, not previously known, sensitivity to morphine postoperatively resulted in recurrent apnea.                                                                                          | 3 |
| 14                                                | Female, 60-69 years, suffering from lung cancer, was admitted with severe back and limb pain related to bone metastases. She was treated with transdermal fentanyl 300 mcg per hour. This resulted in drowsiness and hypoventilation.                                                  | 2 |
| 15                                                | Female, 80-89 years, known with breast cancer and multiple lung metastases. She received tramadol for the pain which have been stopped due to drowsiness.                                                                                                                              | 2 |
| 16                                                | Male, 70-79 years, admitted with severe heart failure. He received morphine 2.5 mg for the pain. As a result of increased, not previously known, sensitivity to morphine, his saturation dropped.                                                                                      | 2 |
| 17                                                | Male, 90-99 years, admitted because of a stroke and a lot of pain. The nurse administered 10% of the prescribed dose of morphine on two occasions which caused unnecessary suffering.                                                                                                  | 2 |
| 18                                                | Male, 60-69 years, admitted for surgery due to an ileus. Postoperative complications included an exacerbation COPD and a hospital acquired pneumonia after receiving morphine.                                                                                                         | 2 |
| 19                                                | Female, 60-69 years, admitted with a reoccurrence of drowsiness, hypoventilation and difficult to wake up which was the result of a dose of methadone being administered in the hospital.                                                                                              | 2 |
| 20                                                | Female, 60-69 years, had a blood pressure drop following the administration of morphine in the recovery room.                                                                                                                                                                          | 1 |
| 21                                                | Female, 70-79 years, admitted with pain related to severe Kahler disease. For the pain, she received opioids (unknown which type). The opioids caused drowsiness and because of the drowsiness, she choked once. This caused a pneumonia. The patient deceased during hospitalization. | 1 |
| 22                                                | Male, 70-79 years, received transdermal fentanyl and oxycodone daily up to 6 times due to metastases in the hip. This caused apraxia and confusion.                                                                                                                                    | 1 |
| 23                                                | Female, 80-89 year, admitted for occlusion of an artery in her leg. She received a morphine infusion causing hypoventilation with a good response to naloxone.                                                                                                                         | 1 |
| 24                                                | Male, 80-89 years, admitted due to obstructive laryngeal cancer, was prescribed anticoagulants. This resulted in a hematoma along with severe abdominal pain for which he received morphine after which he deceased.                                                                   | 1 |
| 25                                                | Male, 60-69 years, admitted with an acute respiratory insufficiency due to pneumonia. He received methadone, causing hypoventilation on two occasions. This needed to be treated with naloxone.                                                                                        | 1 |
| 26                                                | Female, 80-89 years, suffered from pain due to rib fractures caused by resuscitation. She received sufentanil, which led to bronchospasm.                                                                                                                                              | 1 |
| 27                                                | Female, 70-79 years, admitted with pain related to breast cancer. During the admission, it became apparent that she had metastases along with femur and vertebral fractures. A high dose of morphine was necessary to relieve her pain which consequently resulted in a delirium.      | 1 |
| 28                                                | Female, 80-89 years, admitted due to a hip fracture and pain. For her restlessness and pain she was administered morphine which probably caused a reduced level of consciousness.                                                                                                      | 1 |

1  
2  
3 † Patients were categorized in age groups of ten years to avoid traceability.

4 ‡ Preventability was scored on a 6-point Likert scale: 1 = (almost) no evidence of preventability; 2 = small  
5 indications for preventability; 3 = preventability not very likely, less than 50% but 'close call'; 4 = Preventability  
6 more than likely, more than 50% but 'close call'; 5 = strong indications for preventability; 6 = (almost) certain  
7 indications of preventability.

8 § For the judgment on preventability, the experts had access to all information in the electronic patient record  
9 and therefore to the whole context in which ADEs occurred.  
10  
11  
12  
13  
14  
15  
16  
17  
18  
19  
20  
21  
22  
23  
24  
25  
26  
27  
28  
29  
30  
31  
32  
33  
34  
35  
36  
37  
38  
39  
40  
41  
42  
43  
44  
45  
46  
47  
48  
49  
50  
51  
52  
53  
54  
55  
56  
57  
58  
59  
60

For peer review only

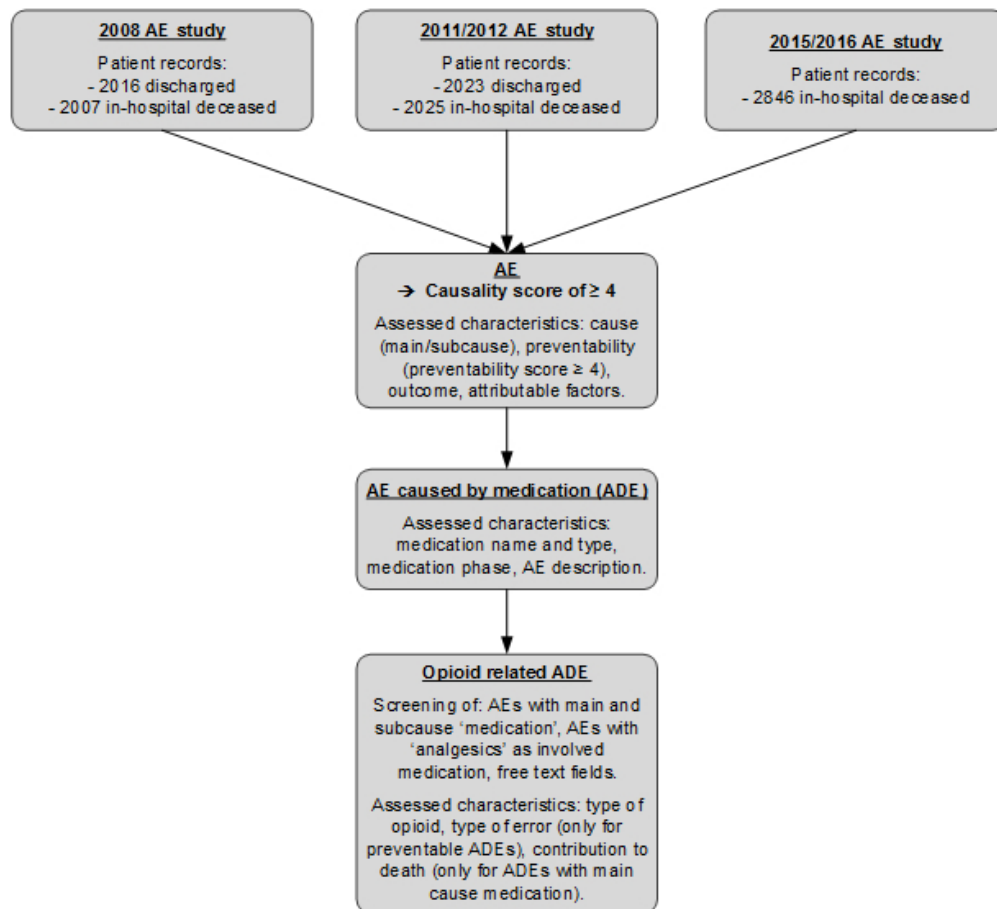

**Figure 1:** Overview of the three Dutch adverse event studies and our study.

| Supplemental Table 1: Positive and negative agreement (%) between nurses and physicians during the adverse events studies. <sup>†‡</sup> |                    |                    |                            |                    |                             |                    |
|------------------------------------------------------------------------------------------------------------------------------------------|--------------------|--------------------|----------------------------|--------------------|-----------------------------|--------------------|
|                                                                                                                                          | Nurses             |                    | Physicians – adverse event |                    | Physicians - preventability |                    |
| Study                                                                                                                                    | Positive agreement | Negative agreement | Positive agreement         | Negative agreement | Positive agreement          | Negative agreement |
| 2008                                                                                                                                     | 76.0               | 89.0               | 63.3                       | 86.9               | n/a                         | n/a                |
| 2011/2012                                                                                                                                | 85.8               | 63.3               | 56.9                       | 82.9               | 73.3                        | 83.3               |
| 2015/2016                                                                                                                                | 91.5               | 68.9               | 54.3                       | 80.9               | 71.4                        | 81.0               |

<sup>†</sup> All frequencies are separately calculated by a 2x2 table:

|                     |                    | Nurse / Physician 1 |                    |
|---------------------|--------------------|---------------------|--------------------|
|                     |                    | Positive agreement  | Negative agreement |
| Nurse / Physician 2 | Positive agreement | A                   | B                  |
|                     | Negative agreement | C                   | D                  |

Positive agreement =  $(2 \times A) / ((2 \times A) + B + C)$  and negative agreement =  $(2 \times D) / ((2 \times D) + B + C)$ .

<sup>‡</sup> The interpretation of the Kappa is not straightforward, and it is influenced by the number of categories of each variable and the prevalence of the given scores. It is therefore possible that despite a high agreement, the Kappa is low. This occurs in studies with few adverse events. For this reason we chose to present positive and negative agreement frequencies. It helps to answer questions such as: 'if one expert finds a preventable adverse event, what is the probability that another expert will also find a preventable adverse event?'



# BMJ Open

## The nature of adverse events with opioids in hospitalized patients: a post-hoc analysis of three patient record review studies.

|                                 |                                                                                                                                                                                                                                                                                                                                                                                                                                                                                                                                                                                                                                |
|---------------------------------|--------------------------------------------------------------------------------------------------------------------------------------------------------------------------------------------------------------------------------------------------------------------------------------------------------------------------------------------------------------------------------------------------------------------------------------------------------------------------------------------------------------------------------------------------------------------------------------------------------------------------------|
| Journal:                        | <i>BMJ Open</i>                                                                                                                                                                                                                                                                                                                                                                                                                                                                                                                                                                                                                |
| Manuscript ID                   | bmjopen-2020-038037.R1                                                                                                                                                                                                                                                                                                                                                                                                                                                                                                                                                                                                         |
| Article Type:                   | Original research                                                                                                                                                                                                                                                                                                                                                                                                                                                                                                                                                                                                              |
| Date Submitted by the Author:   | 27-Jun-2020                                                                                                                                                                                                                                                                                                                                                                                                                                                                                                                                                                                                                    |
| Complete List of Authors:       | Schutijser, Bernadette; Amsterdam UMC, Vrije Universiteit Amsterdam, Public & Occupational Health<br>Jongerden, Irene; Amsterdam UMC, Vrije Universiteit Amsterdam, Public and Occupational Health<br>Klopotoska, Joanna; Amsterdam UMC, Academic Medical Center Amsterdam, Medical Informatics<br>Moesker, Marco; Amsterdam UMC, Vrije Universiteit Amsterdam, Public and Occupational Health<br>Langelaan, Maaïke; PinkRoccade Healthcare<br>Wagner, Cordula; Netherlands Institute for Health Services Research (NIVEL)<br>de Bruijne, Martine; Amsterdam UMC, Vrije Universiteit Amsterdam, Public and Occupational Health |
| <b>Primary Subject Heading</b>: | Pharmacology and therapeutics                                                                                                                                                                                                                                                                                                                                                                                                                                                                                                                                                                                                  |
| Secondary Subject Heading:      | Evidence based practice, Nursing                                                                                                                                                                                                                                                                                                                                                                                                                                                                                                                                                                                               |
| Keywords:                       | PAIN MANAGEMENT, Adverse events < THERAPEUTICS, Health & safety < HEALTH SERVICES ADMINISTRATION & MANAGEMENT, Quality in health care < HEALTH SERVICES ADMINISTRATION & MANAGEMENT                                                                                                                                                                                                                                                                                                                                                                                                                                            |
|                                 |                                                                                                                                                                                                                                                                                                                                                                                                                                                                                                                                                                                                                                |

SCHOLARONE™  
Manuscripts



I, the Submitting Author has the right to grant and does grant on behalf of all authors of the Work (as defined in the below author licence), an exclusive licence and/or a non-exclusive licence for contributions from authors who are: i) UK Crown employees; ii) where BMJ has agreed a CC-BY licence shall apply, and/or iii) in accordance with the terms applicable for US Federal Government officers or employees acting as part of their official duties; on a worldwide, perpetual, irrevocable, royalty-free basis to BMJ Publishing Group Ltd ("BMJ") its licensees and where the relevant Journal is co-owned by BMJ to the co-owners of the Journal, to publish the Work in this journal and any other BMJ products and to exploit all rights, as set out in our [licence](#).

The Submitting Author accepts and understands that any supply made under these terms is made by BMJ to the Submitting Author unless you are acting as an employee on behalf of your employer or a postgraduate student of an affiliated institution which is paying any applicable article publishing charge ("APC") for Open Access articles. Where the Submitting Author wishes to make the Work available on an Open Access basis (and intends to pay the relevant APC), the terms of reuse of such Open Access shall be governed by a Creative Commons licence – details of these licences and which [Creative Commons](#) licence will apply to this Work are set out in our licence referred to above.

Other than as permitted in any relevant BMJ Author's Self Archiving Policies, I confirm this Work has not been accepted for publication elsewhere, is not being considered for publication elsewhere and does not duplicate material already published. I confirm all authors consent to publication of this Work and authorise the granting of this licence.

**TITLE PAGE****The nature of adverse events with opioids in hospitalized patients: a post-hoc analysis of three patient record review studies.**

*Bernadette C.F.M. Schutijser, MSc<sup>1</sup>, Irene P. Jongerden, PhD<sup>1</sup>, Joanna E. Klopowska, PhD<sup>2</sup>, Marco J. Moesker, MSc<sup>1</sup>, Maaike Langelaan, PhD<sup>3</sup>, Cordula Wagner, PhD<sup>1,4</sup>, Martine C. de Bruijne, PhD<sup>1</sup>*

<sup>1</sup> Amsterdam UMC, Vrije Universiteit Amsterdam, Department of Public and Occupational Health, Amsterdam Public Health, Amsterdam, the Netherlands.

<sup>2</sup> Amsterdam UMC, Academic Medical Center Amsterdam, Department of Medical Informatics, Amsterdam, the Netherlands.

<sup>3</sup> PinkRocade Healthcare, Apeldoorn, The Netherlands.

<sup>4</sup> Netherlands Institute for Health Services Research (NIVEL), Utrecht, The Netherlands.

**Corresponding author**

Bernadette C.F.M. Schutijser, MSc, RN

Amsterdam UMC, Vrije Universiteit Amsterdam

Department of Public and Occupational Health, Amsterdam Public Health research institute

Van der Boechorststraat 7, 1081 BT Amsterdam, The Netherlands

Email: b.schutijser@amsterdamumc.nl / Telephone: +31(0)204449612

**Word count** 3700

**ABSTRACT****Objectives**

Opioids are increasingly prescribed and frequently involved in adverse drug events (ADEs). The underlying nature of opioid related ADEs (ORADEs) is however understudied. This hampers our understanding of risks related to opioid use during hospitalization and when designing interventions. Therefore, we provided a description of the nature of ORADEs.

**Design**

A post-hoc analysis of data collected during three retrospective patient record review studies (in 2008, 2011/2012 and 2015/2016).

**Setting**

The three record review studies were conducted in 32 Dutch hospitals.

**Participants**

A total of 10,917 patient records were assessed by trained nurses and physicians.

**Outcome measures**

Per identified ORADE, we described preventability, type of medication error, attributable factors and type of opioid involved. Moreover, characteristics of preventable and non-preventable ORADEs were compared to identify risk factors.

**Results**

Out of 10,917 patient records, 357 ADEs were identified of which 28 (8%) involved opioids. Eleven ORADEs were assessed as preventable. Of these, ten were caused by dosing errors and four probably contributed to the patients' death. Attributable factors identified were mainly on patient and organizational level. Morphine and oxycodone were the most frequently involved opioids. The risk for ORADEs was higher in elderly patients.

**Conclusions**

Only 8% of ADEs identified in our sample were related to opioids. Although the frequency is low, the risk of serious consequences is high. We recommend to use our findings to increase awareness among physicians and nurses. Future interventions should focus on safe dosing of opioids when prescribing and administering, especially in elderly patients.

**Keywords** Analgesia, Pain control, Adverse drug events, Hospitals, Drug Prescriptions, Opioids, ORADE

(248 words, without key-words)

### STRENGTHS AND LIMITATIONS OF THIS STUDY

- This study was based on data gathered during three national retrospective patient record review studies conducted in 2008, 2011/2012 and 2015/2016 within 32 Dutch hospitals.
- During all three studies, a broad and randomly selected sample of all hospital admissions of patients were reviewed to assess the nature and preventability of adverse drug events with opioids.
- Our study population was stratified, resulting in an overrepresentation of in-hospital deceased patients.
- The low frequency of ORADEs limited a comparison of events over time between the three study periods.

For peer review only

## TEXT

### INTRODUCTION

Over the past decades, prescription of opioids has substantially increased worldwide.<sup>1,2</sup> Moreover, the rise in addiction rates and deaths resulting from opioid overdoses have urged physicians to call out an opioid crisis.<sup>3</sup> In the Netherlands, the prescription of oxycodone has increased almost fivefold over ten years (from 96.000 users in 2008 to 485.000 users in 2018).<sup>4</sup> This increase may however not only lead to more addiction but may also affect the number of opioid related adverse drug events (ADEs) in hospitals.

Opioids are frequently involved in ADEs,<sup>5-7</sup> and approximately in 2-14% of all patients.<sup>8-12</sup> ADEs are unintended injuries from a medical intervention related to drugs.<sup>13</sup> Opioid related ADEs (ORADEs) occur frequently, specifically in pediatric,<sup>7,14</sup> palliative<sup>15</sup> and surgical patients.<sup>10,11,16</sup> ORADEs are often caused by errors such as omissions or incorrect dosing.<sup>7,14,15,17</sup> In addition, approximately 11% of ORADEs among hospitalized patients cause severe or even fatal patient harm,<sup>18</sup> also because of the fast therapeutic effects of opioids. Besides these severe consequences, ORADEs lead to significantly higher healthcare costs.<sup>9,10,16</sup>

Our current knowledge about the incidence of ORADEs and their underlying nature is mostly based on medication related incident reports.<sup>7,14,15,17</sup> However, a comprehensive patient chart review provides the most reliable information on ADEs in hospitals while incident reports suffer from severe underreporting.<sup>19,20</sup> Furthermore, ORADE studies based on incident reports were usually conducted at one point in time or within one hospital or at a specific department.<sup>7,14,15,17</sup> The few ORADE studies based on comprehensive patient chart review were mainly conducted within a surgical population.<sup>10,11,16</sup>

Therefore, and also motivated by the opioid crisis, we have conducted an in-depth analysis of ORADEs using data gathered during three consecutive national adverse event studies in the Netherlands in which patient record review was applied. To our knowledge, no such longitudinal multicenter study on ORADEs in a diverse inpatient population and using a comprehensive ADE detection method has been published. The aim of this study was to provide a detailed description of the underlying nature of ORADEs. By doing so, we hope to increase awareness and provide recommendations on how to prevent opioid related ADEs in future hospitalized patients.

### METHODS

#### Design and setting

We conducted a post-hoc analysis of data that were collected during three national retrospective patient record review studies conducted in 2008, 2011/2012 and 2015/2016. The aim of these studies was to identify AEs and ADEs in Dutch hospitals. A detailed description of the methodology used in these studies was previously published and comparable to other international AEs studies.<sup>21,22</sup> In summary, for the 2008 and 2011/2012 studies, a random sample of 20 hospitals participated. In 2015/2016, a new random sample of 19 hospitals was selected, of which seven had previously participated in two of the earlier studies. Both samples were stratified for hospital type and representation of urban and rural area. In 2008 and 2011/2012, 200 patient records per hospital were randomly selected for review; 100 records of discharged patients and 100 records of in-hospital deceased patients. The 2015/2016 study was limited to 150 in-hospital deceased patients per hospital because the frequency of preventable AEs remained unchanged for in-hospital deceased patients in both the 2008 and the 2011/2012 measurement.<sup>23-25</sup> Records of patients younger than one year and of patients admitted at the departments of psychiatry and obstetrics were excluded

1  
2  
3 because other expertise is necessary to detect AEs in these patients. The random selection of patient  
4 records was conducted by the participating hospitals with clear instructions of the researchers. The  
5 medical ethical committee of the Amsterdam UMC, Vrije Universiteit Amsterdam waived the  
6 requirement of informed consent (protocol numbers: 2005.146, 2009.130, 2016.282) as they found  
7 the scope of the study outside the Dutch Medical Research (Human Subjects) Act.  
8  
9

### 10 **Review procedure AE studies**

11 During all three AE studies, selected patient records were reviewed for the occurrence of AEs,  
12 including ADEs. In Figure 1, a schematic overview of the review process in the national studies and  
13 this study is presented. In summary, the review process consisted of two phases. In phase one, the  
14 records were screened for potential AEs by trained independent nurses. When predefined triggers  
15 were found, indicating an AE might have occurred, the record was labelled for an in-depth review by  
16 a trained independent physician. Independent means that the physicians and nurses never had an  
17 employment contract in the participating hospitals. The physicians were highly experienced and  
18 specialized in surgery, internal medicine or neurology, and during the record review studies they had  
19 access to all information in the electronic patient record. Besides, 10% of all patient records were  
20 reviewed by two physicians to determine inter-rater reliability. Validity of this scoring system has not  
21 been tested, but it has been used widely in AE studies for over 20 years and the ratings of the system  
22 did not change in that time.<sup>21-23,26-29</sup> Prior to the study, both nurses and physicians had training  
23 sessions in which cases were discussed to enhance the quality and standardization of the review  
24 process.  
25

26 An AE was defined by three criteria: 1) an unintended physical or mental injury; 2) the injury resulted  
27 in prolongation of hospital stay, temporary or permanent disability or death; 3) the injury was caused  
28 by healthcare management rather than the patient's underlying disease.<sup>23,27,28</sup> An AE was scored as  
29 caused by the healthcare (causality) if the likelihood score was equal to or greater than 4 based on a  
30 6-point Likert scale with (virtually) no evidence (1), slight to modest evidence (2), not likely, but  
31 borderline (3), more likely but borderline (4), moderate to strong evidence (5), or (virtually) certain  
32 evidence (6) of management causation. The scoring system was used in all three record review  
33 studies and the physicians made the judgments about causality and preventability based on all the  
34 available information of the patient's condition and taking into account the guidelines.  
35

36 If an AE was identified, the independent physicians (hereafter: experts) assessed each AE on:  
37 cause (diagnostic, surgery, non-invasive procedure, medication, other clinical activities, admission,  
38 and other), preventability, possible contribution to death, and attributable factors. The attributable  
39 factors were based on the taxonomy of the Eindhoven Classification Model and consisted of the main  
40 categories: technical, care, organizational, patient related, violation and other.<sup>30</sup> An AE was  
41 considered to be preventable when the care given fell below the current level of expected  
42 performance of practitioners or systems. Before the physicians answered the question about  
43 preventability, they were required to respond to 13 questions to add more structure to the review  
44 process. For example, if there was a complex medical history, if the patient had co-morbidity and  
45 whether another physician would repeat this treatment. Preventability was also assessed on a 6-  
46 point Likert scale with almost no evidence (1), slight to modest evidence (2), modest evidence, but  
47 borderline (3), modest to strong evidence (4), strong evidence (5) or almost certain evidence (6) of  
48 preventability. A score of 4-6 indicated that the reviewer assessed the AE as having a greater than  
49 50% chance of being potentially preventable.  
50  
51  
52  
53  
54  
55  
56  
57  
58  
59  
60

1  
2  
3 Furthermore, for each patient the following characteristics were registered: gender, age,  
4 length of hospital stay, urgency of admission, whether patients were terminally ill prior to the  
5 admission, the number of involved medical specialists, department of admission, type of procedure  
6 and co-morbidity. The latter was divided in no, minor, moderate and severe co-morbidity, and was  
7 assessed by the experts after careful review of the information in the patient record. Also, one  
8 organizational characteristic (type of hospital: university, tertiary teaching, or general) and one AE  
9 characteristic (weekend or holiday at the time of the AE) were registered.  
10  
11

12 When an AE was medication related (ADE), the following additional characteristics were  
13 registered by the experts: name and type of medication involved, medication phase, a description of  
14 the ADE, and whether the ADE possibly contributed to the patients' death. The medication phases  
15 were classified into ordering, transcribing, dispensing, administering and monitoring.<sup>31,32</sup> The possible  
16 contribution to the patients' death was only registered for ORADEs with 'medication' as a main cause  
17 of the event and not for ADEs with 'medication' as a sub cause.  
18  
19

20 All data were entered into a national AE database, specifically designed for the AE studies.  
21  
22

### 23 **Review procedure ORADEs**

24 For our study, we used the national AE database to identify ORADEs (Figure 1). One researcher (BS)  
25 conducted the screening of the database and retrieved several pre-selected variables: (1) AEs with  
26 the main classification cause 'medication' as well as AEs with 'medication' as a sub cause and (2) AEs  
27 with 'analgesics' as involved medication. Furthermore, two free-text fields were selected: the  
28 summary of the AEs and the preventability assessment. A second researcher (MM) independently  
29 double checked the selection procedure.  
30  
31

32 All identified ORADEs, were then classified by BS on type of opioid involved using the World  
33 Health Organization Anatomical Therapeutic Chemical (WHO ATC) classification.<sup>33</sup> For the  
34 preventable ORADEs, the type of medication error was classified according to a data driven analysis  
35 of the free-text summaries of the ADEs. The classification of ORADEs was double checked by two  
36 senior researchers (JK & IJ) and any discrepancies were resolved by consensus.  
37  
38

### 39 **Outcomes**

40 To provide insight into the nature of the ORADEs, each ORADE case was summarized by gender, age  
41 of the patient (categorized in steps of 10 years for privacy reasons), type of opioid involved,  
42 attributable factors and preventability. When the ORADE was preventable, then the type of  
43 medication error and medication phase was also described. Furthermore, in order to identify risk  
44 factors, we compared the outcome variables between preventable and non-preventable ORADEs.  
45  
46  
47

### 48 **Data analysis**

49 Only descriptive statistics were used in this study. Descriptives are presented as median (age and  
50 length of hospital stay) or frequency (gender, comorbidity, type of opioid and attributable factor,  
51 etc.). Patient and hospital characteristics are presented on a patient level and ORADE characteristics  
52 are presented on AE level. Inter-rater reliability among nurses and physicians was addressed in terms  
53 of positive and negative agreement frequencies.<sup>34</sup> All analyses were conducted using STATA version  
54 14.1 (StataCorp, TX) and double checked by a second researcher (MM) and a statistician (PS).  
55  
56  
57  
58  
59  
60



## RESULTS

In total, 10,917 records were screened during the three AE studies. The patient records of discharged and deceased patients were equally distributed among male and female patients. Most patients were hospitalized for a non-elective procedure (Table 1). In 1150 patient records, at least one AE was detected, with a total of 1240 AEs. When detecting the predefined triggers, positive agreement between nurses varied between 76.0-91.5%. When detecting the adverse events, positive agreement between physicians varied between 53.4-63.3%. For assessing the preventability positive agreement between physicians varied between 71.4-73.3%. Overall, agreement frequencies were moderate. More detailed information about the inter-rater reliability is presented in Supplemental Table 1.

### Opioid related ADEs

Of 1240 AEs, 357 (29%) were medication related (ADEs). In 28 (8%) ADEs, opioids were involved. These ADEs are summarized in detail in Box 1, and included 24 ADEs with 'medication' as a main cause and four ADEs with 'medication' as a sub cause. The ORADEs occurred in 27 patients; one patient experienced two ORADEs. Most patients with ORADEs involved females (59%). Median age of the patients was 76 years (Inter Quartile Range (IQR): 66-83) and median length of hospital stay was 7 days (IQR: 4-16). Most patients had moderate to significant co-morbidity (70%) and had three medical specialists during the admission (78%) (Table 2).

### Nature of opioid related ADEs: preventability

According to the experts, 11 (39%) out of the 28 ORADEs were considered as potentially preventable (Table 3). Non-preventable (31%) ORADEs occurred slightly more during weekends and holidays than preventable ADEs (18%). Moreover, most preventable and non-preventable ORADEs occurred during dayshifts (8am-5pm).

### Nature of opioid related ADEs: medication errors & phase

Of the 11 potentially preventable ORADEs, 10 (91%) were caused by dosing errors of which six during the prescribing phase (cases #1, #3, #7, #8, #9, #10) and four during the administration phase (cases #2, #4, #5, #6) (Box 1). Of the ten dosing errors, six occurred in elderly patients ( $\geq 70$  years) (cases #1, #3, #4, #5, #8, #9), and two around the patients' discharge (cases #2, #7). The remaining one preventable ORADE (#11) was related to incorrect decision making. Finally, the experts assessed the consequences of the ORADEs (multiple options possible). In eight ORADEs, an intervention or extra treatment was needed, in two ORADEs the patients had a prolonged hospital stay and four preventable ORADEs possibly contributed to the death of the patient (cases #5, #6, #8, #9).

### Nature of opioid related ADEs: attributable factors

The attributable factors involved in ORADEs were care (knowledge, skills, monitoring, verification, and coordination of care) and patient related (co-morbidity, age, a demanding patient or a patient with an intellectual disability) (Table 3). Of preventable ORADEs, 8 were care related and 6 were patient related. For non-preventable ORADEs, 3 were care related and 10 were patient related. However, in 3 of the cases of non-preventable ORADEs, the attributable factors could not be assessed by the experts due to insufficient information in the patient records.

### Nature of opioid related ADEs: medication involved

Eight out of the eleven preventable ADEs occurred with opioids with ATC code N02AA which are morphine and oxycodone (Table 3). Non-preventable ORADEs occurred with opioids mainly with ATC code N02AA (morphine and oxycodone, 53%).

### DISCUSSION

In three national patient record studies with 4 years intervals, we found 28 ADEs caused by opioids. These ADEs correspond with 8% of all identified ADEs and 0.3% of all studied patient records. Eleven of the 28 opioid related ADEs (ORADEs) (39%) were assessed as potentially preventable, involving mostly morphine and oxycodone. Dosing errors, during the prescription and administration phase were the most common cause of preventable ORADEs, and occurred most often in elderly patients. Four preventable ORADEs probably contributed to the patients' death. Finally, attributable factors for the ADEs were mostly care and patient related.

In this study, the percentage of ORADEs of all patient records (0.3%) was low, also in comparison with previously conducted ORADE studies that focused on large populations (11-14%).<sup>10,11,16</sup> However, two of these studies were based on large databases and all involved surgical patients who often receive opioids post-operative. We focused on a broad hospitalized patient population, both surgical and non-surgical. Furthermore, the difference in ORADE occurrence might be explained by differences in the used ADE definition. For example, instead of using all ORADEs, i.e. including side-effects of opioids, in our study only ADEs that resulted in severe patient harm were included. This means that ADEs resulted in prolongation of hospital stay, temporary or permanent disability or death. Furthermore, only ADEs with a causality likelihood score of equal or greater than 4 were included, which means that the experts indicated an ADE as having a greater than 50% chance of being caused by healthcare. Should we have selected the cases with causality likelihood scores of 1-3 as well, then we could determine at least 2500 additional cases on whether medication and opioids were related. However, we did not determine these 2500 cases, since we wanted to stay true to the definition of an AE (at least 4 on the 6-point Likert scale) and we did not consider it ethical to change the method of the study afterwards.

In line with previous studies,<sup>7,14,15,17</sup> we found that dosing errors during prescribing and administering were the main cause of preventable ORADEs. Furthermore, 60% of the dosing errors in our study occurred in elderly patients ( $\geq 70$  years). In general, prescribing medication for elderly patients is challenging since polypharmacy, multi-morbidity and altered pharmacokinetics and pharmacodynamics of drugs are often present. Besides, this population will rapidly increase in the upcoming years. Specifically related to opioids, physicians also need to be aware of the higher sensitivity of elderly patients to the effects of opioids,<sup>35</sup> and balancing between minimizing the risk of addiction and side-effects while effectively relieving pain.<sup>36,37</sup> Taking into account all these factors while prescribing, demands a lot from physicians during their busy daily hospital practice. A clinical decision support system (CDSS), can help physicians in this complex task by showing warnings and advices during prescribing, for example showing the most appropriate choice of medication for a given condition and/or by providing dosing recommendations. CDSS has shown to effectively reduce prescribing errors among hospitalized elderly patients<sup>38,39</sup> and errors with medications of which the therapeutic effects are fast, such as opioids.<sup>40</sup> Furthermore, a CDSS can also be effective in predicting which patients are at risk for ORADEs. Using retrospective data from gastro-intestinal surgical patients, Minkowitz et al. (2014) developed a risk-scoring model to identify patients with a high risk for experiencing an ORADE based on their clinical and demographic profiles.<sup>41</sup> If developed

1  
2  
3 specifically for elderly inpatients, such a prediction model could help physicians in determining the  
4 most appropriate and safe pain management strategy for these vulnerable patients. Finally, a CDSS  
5 could also be used to identify patients who might be suitable for pre-emptive genotyping, which  
6 involves metabolic testing prior to prescribing.<sup>42</sup> Patients with high levels of pain despite using high  
7 doses of pain medication or patients that experience severe side-effects while using common dosing  
8 schedules may especially benefit from such an intervention.<sup>43</sup>  
9

10  
11 Administering opioids is a task usually conducted by nurses. The dosing errors in our study  
12 were mostly related to injectable opioids. Error prone activities, such as calculating the concentration  
13 and administration rate,<sup>14,17</sup> require that nurses have sufficient arithmetic knowledge and follow the  
14 protocol for safe preparation and administration of injectable medication. However, in daily practice,  
15 some nurses have math anxiety and on average arithmetic knowledge of nursing students seems  
16 moderate.<sup>44,45</sup> Besides, nurse compliance with protocols for safe administration of injectable  
17 medication is considered low (around 20%)<sup>46,47</sup> and needs further attention. An intervention which  
18 might help to reduce dosing errors during opioid administration is the use of smart infusion pumps.  
19 These pumps have integrated medication libraries which allow nurses to set the pump automatically  
20 to the right administration rate during administration. By doing so, the administration rate of smart  
21 pumps can be seen as a double check of the nurses' own calculation. Smart pumps seem also  
22 effective in reducing programming errors.<sup>48</sup> Furthermore, educational programs for nurses about  
23 brand and generic names and pharmacology of opioids or side-effects might increase their  
24 knowledge and awareness of risks related to dosing during the administration of opioids.<sup>49-51</sup>  
25

26  
27 Overall, we think the ORADE frequency of 8% of all ADEs and 0.3% of all studied patient  
28 records found in our study is low and acceptable. However, although the frequency is low, the risk of  
29 serious consequences is high. Thus, new contributions to prevent ORADEs in future hospitalized  
30 patients need to be identified. Using the Safety-2 perspective may offer new opportunities to do so.<sup>52</sup>  
31 In order to understand what happened when an adverse (drug) event occurred, it is also necessary to  
32 understand how work is done when the process goes well.<sup>53</sup> Since healthcare processes have become  
33 more complex nowadays, it may be helpful to visualize the current variable practice of prescribing  
34 and administering opioids from a multi-stakeholder perspective.<sup>54</sup>  
35

### 36 37 38 39 40 **Strengths and limitations**

41 Opioids are in the top ten of drug types that causes fatal medication errors.<sup>8</sup> Hence, focusing on the  
42 detailed description of the nature of ORADEs was important and necessary. Another strength of this  
43 study is that it was based on a comprehensive ADE detection method and conducted in a broad  
44 sample of all hospital admissions. Most previous studies, which described the nature of ORADEs, are  
45 based on medication related incident reports. Furthermore, data were gathered over an extended  
46 period of time within a randomly selected sample of one third of all Dutch hospitals.  
47

48  
49 This study also has some limitations. Firstly, in all three AE studies, the population consisted  
50 of relatively many older and deceased patients. Therefore, it is not possible to generalize the results  
51 to all Dutch hospital population. To make the study sample more representative for the Dutch  
52 hospital population, weighting the results (i.e. correcting for type of hospital, study period and  
53 discharge status) would be a solution which is used in previous studies of our research group.  
54 However, since the total amount of ORADEs was low, we chose not to weight our results as this had  
55 little effect and makes interpretation difficult. Secondly, overall agreement frequencies between  
56 physicians were moderate. This could have led to different assessments or different scores if other  
57 experts were involved. This should be taken into account when interpreting our results. However, a  
58  
59  
60

1  
2  
3 previous review of studies focusing on assessing AEs showed also moderate to substantial inter-rater  
4 reliability.<sup>55</sup> For this reason, patient records in all Dutch AE studies have been assessed by the same  
5 experts as much as possible and over the years these experts have not become stricter or lenient in  
6 their judgment of AEs and their preventability.<sup>56</sup> Thirdly, due to this low number of ORADEs, it was  
7 not possible to compare the events over the three study periods. Therefore, we cannot conclude  
8 whether the low number is a positive finding, and if the occurrence of ORADEs increased or  
9 decreased over time. Fourthly, our post-hoc analysis was based on the information previously  
10 recorded by the experts in an AE database, and on the assessment conducted by these physicians.  
11 Therefore, some information could be missing and interpreting the assessment of preventability was  
12 difficult for us in one case, resulting in a non-preventable ORADE. Furthermore, this was also the  
13 reason that the harm could not be further categorized according to the NCCMERP Index for  
14 Categorizing Medication Errors.<sup>57</sup> Besides, the retrospective interpretation can also be biased by  
15 temporal views. The current opinion is that prescribing opioids should be minimized due to the harm  
16 of opioids, which is supported by updated guidelines.<sup>58</sup> This view changed throughout the years and  
17 may not have been recognized 15 years ago, when the focus was mainly on alleviating suffering of  
18 pain. This change in opinion may have increased alertness when prescribing or administering opioids,  
19 which could have led to less ORADEs. However, our study showed that ORADEs still occur and  
20 publishing about them could serve as a method of increasing awareness.

## 27 **CONCLUSION**

28 Only 8% of ADEs identified in our sample were related to opioids, 0.3% of all studied patient records.  
29 Although the frequency is low, the risk of serious consequences is high. We recommend to use our  
30 findings to increase awareness among physicians and nurses. Future interventions should focus on  
31 safe dosing of opioids when prescribing and administering, especially in elderly patients.  
32  
33  
34  
35  
36  
37  
38  
39  
40  
41  
42  
43  
44  
45  
46  
47  
48  
49  
50  
51  
52  
53  
54  
55  
56  
57  
58  
59  
60

1  
2  
3 **Acknowledgements** We would like to thank all participating hospitals and independent nurses and  
4 physicians for their cooperation during the data collection on the three Dutch adverse event studies.  
5 We also thank Peter Spreeuwenberg, MSc for double checking the statistical analyses and Catherine  
6 Combee - Duffy, MANP for improving the readability of this article. This study was funded by the  
7 Dutch Ministry of Health, Welfare, and Sport.  
8  
9

10  
11 **Contributors** BS, MM, JK, ML, MdB, and CW designed the study and developed the study protocol. BS  
12 and MM organized the selection and classification of ORADEs. JK and IJ double checked this  
13 classification. BS and MM performed statistical analyses and interpreted the analytical results. BS, JK,  
14 and IJ wrote the manuscript. MdB, and CW supervised the study. All authors made critical revisions  
15 and approved the final version of the manuscript.  
16  
17

18 **Funding** This study was funded by the Dutch Ministry of Health, Welfare, and Sports.  
19  
20

21 **Competing interests** None declared.  
22  
23

24 **Data sharing statement** No additional data are available.  
25  
26

27 **Patient statement** Patients or the public were not involved in the design, or conduct, or reporting, or  
28 dissemination plans of our research.  
29  
30

31 **Open Access** This is an Open Access article distributed in accordance with the Creative Commons  
32 Attribution Non Commercial (CC BY-NC 4.0) license, which permits others to distribute, remix, adapt,  
33 build upon this work non-commercially, and license their derivative works on different terms,  
34 provided the original work is properly cited and the use is non-commercial. See:  
35 <http://creativecommons.org/licenses/by-nc/4.0/>  
36  
37  
38  
39  
40  
41  
42  
43  
44  
45  
46  
47  
48  
49  
50  
51  
52  
53  
54  
55  
56  
57  
58  
59  
60

## REFERENCES

1. Schepens MHJ, Leusink M, de Vries SE, et al. [Increase in opioid prescribing in extramural care in the Netherlands: assessment of use and prescription behaviour, based on claims data]. *Ned Tijdschr Geneeskd.* 2019;163.
2. Lyden J, Binswanger IA. The United States opioid epidemic. *Semin Perinatol.* 2019;43(3):123-31.
3. AMA. Physicians' progress to reverse the nation's opioid epidemic.: American Medical Association; 2018. Available at: <https://www.ama-assn.org/sites/default/files/media-browser/public/physicians/patient-care/opioid-task-force-progress-report.pdf>. Accessed August 8, 2018.
4. Overheid.nl. Geneesmiddelenbeleid. Den Haag, The Netherlands: Overheid.nl; 2019. Available at: <https://zoek.officielebekendmakingen.nl/kst-29477-537.html>. Accessed March 19, 2019.
5. Laatikainen O, Miettunen J, Sneck S, et al. The prevalence of medication-related adverse events in inpatients-a systematic review and meta-analysis. *Eur J Clin Pharmacol.* 2017;73(12):1539-49.
6. Mihajlovic S, Gauthier J, MacDonald E. Patient characteristics associated with adverse drug events in hospital: an overview of reviews. *Can J Hosp Pharm.* 2016;69(4):294-300.
7. Mc Donnell C. Opioid medication errors in pediatric practice: four years' experience of voluntary safety reporting. *Pain Res Manag.* 2011;16(2):93-8.
8. Saedder EA, Brock B, Nielsen LP, et al. Identifying high-risk medication: a systematic literature review. *Eur J Clin Pharmacol.* 2014;70(6):637-45.
9. Kane-Gill SL, Rubin EC, Smithburger PL, et al. The cost of opioid-related adverse drug events. *J Pain Palliat Care Pharmacother.* 2014;28(3):282-93.
10. Oderda GM, Gan TJ, Johnson BH, et al. Effect of opioid-related adverse events on outcomes in selected surgical patients. *J Pain Palliat Care Pharmacother.* 2013;27(1):62-70.
11. Kessler ER, Shah M, Gruschus SK, et al. Cost and quality implications of opioid-based postsurgical pain control using administrative claims data from a large health system: opioid-related adverse events and their impact on clinical and economic outcomes. *Pharmacotherapy.* 2013;33(4):383-91.
12. de Vries EN, Ramrattan MA, Smorenburg SM, et al. The incidence and nature of in-hospital adverse events: a systematic review. *Qual Saf Health Care.* 2008;17(3):216-23.
13. Bates DW, Cullen DJ, Laird N, et al. Incidence of adverse drug events and potential adverse drug events. Implications for prevention. ADE Prevention Study Group. *Jama.* 1995;274(1):29-34.
14. Doherty C, Mc Donnell C. Tenfold medication errors: 5 years' experience at a university-affiliated pediatric hospital. *Pediatrics.* 2012;129(5):916-24.
15. Heneka N, Shaw T, Rowett D, et al. Opioid errors in inpatient palliative care services: a retrospective review. *BMJ Support Palliat Care.* 2018;8(2):175-79.
16. Shafi S, Collinsworth AW, Copeland LA, et al. Association of opioid-related adverse drug events with clinical and cost outcomes among surgical patients in a large integrated health care delivery system. *JAMA Surg.* 2018;153(8):757-63.
17. Dy SM, Shore AD, Hicks RW, et al. Medication errors with opioids: results from a national reporting system. *J Opioid Manag.* 2007;3(4):189-94.
18. Cousins DH, Gerrett D, Warner B. A review of medication incidents reported to the national reporting and learning system in England and Wales over 6 years (2005-2010). *Br J Clin Pharmacol.* 2012;74(4):597-604.
19. Noble DJ, Pronovost PJ. Underreporting of patient safety incidents reduces health care's ability to quantify and accurately measure harm reduction. *J Patient Saf.* 2010;6(4):247-50.
20. Yung HP, Yu S, Chu C, et al. Nurses' attitudes and perceived barriers to the reporting of medication administration errors. *J Nurs Manag.* 2016;24(5):580-8.
21. Baker GR, Norton PG, Flintoft V, et al. The Canadian adverse events study: the incidence of adverse events among hospital patients in Canada. *CMAJ.* 2004;170(11):1678-86.
22. Brennan TA, Leape LL, Laird NM, et al. Incidence of adverse events and negligence in hospitalized patients. Results of the Harvard Medical Practice Study I. *N Engl J Med.* 1991;324(6):370-6.

- 1  
2  
3 23. Baines RJ, Langelaan M, de Bruijne MC, et al. Changes in adverse event rates in hospitals over  
4 time: a longitudinal retrospective patient record review study. *BMJ Qual Saf.* 2013;22(4):290-8.  
5 24. Langelaan M, De Bruijne MC, Baines RJ, et al. Dutch adverse event study 2011/2012 Utrecht:  
6 NIVEL/EMGO+; 2013. Available at:  
7 [https://www.nivel.nl/sites/default/files/bestanden/monitor\\_zorggerelateerde\\_schade\\_2011\\_2012.p](https://www.nivel.nl/sites/default/files/bestanden/monitor_zorggerelateerde_schade_2011_2012.pdf)  
8 [df](https://www.nivel.nl/sites/default/files/bestanden/monitor_zorggerelateerde_schade_2011_2012.pdf). Accessed December 12, 2018.  
9 25. Baines RJ, Langelaan M, de Bruijne MC, et al. Is researching adverse events in hospital deaths a  
10 good way to describe patient safety in hospitals: a retrospective patient record review study. *BMJ*  
11 *Open.* 2015;5(7):e007380.  
12 26. Vincent C, Neale G, Woloshynowych M. Adverse events in British hospitals: preliminary  
13 retrospective record review. *Bmj.* 2001;322(7285):517-9.  
14 27. Zegers M, de Bruijne MC, Wagner C, et al. Adverse events and potentially preventable deaths in  
15 Dutch hospitals: results of a retrospective patient record review study. *Qual Saf Health Care.*  
16 2009;18(4):297-302.  
17 28. Damen NL, Baines R, Wagner C, et al. Medication-related adverse events during hospitalization: a  
18 retrospective patient record review study in The Netherlands. *Pharmacoepidemiol Drug Saf.*  
19 2017;26(1):32-9.  
20 29. Baines R, Langelaan M, de Bruijne M, et al. How effective are patient safety initiatives? A  
21 retrospective patient record review study of changes to patient safety over time. *BMJ Qual Saf.*  
22 2015;24(9):561-71.  
23 30. van Vuren W, Shea CE, van der Schaaf TW. The development of an incident analysis tool for the  
24 medical field. . Eindhoven: Eindhoven University of Technology; 1997.  
25 31. Morimoto T, Sakuma M, Matsui K, et al. Incidence of adverse drug events and medication errors  
26 in Japan: the JADE study. *J Gen Intern Med.* 2011;26(2):148-53.  
27 32. WHO. Medication errors: technical series on safer primary care. Geneva: World Health  
28 Organization; 2016. Available at:  
29 <http://apps.who.int/iris/bitstream/handle/10665/252274/9789241511643-eng.pdf?sequence=1>.  
30 Accessed July 12, 2018.  
31 33. WHO. ATC/DDD Index 2017. Available at: [https://www.whocc.no/atc\\_ddd\\_index/?code=N02A](https://www.whocc.no/atc_ddd_index/?code=N02A).  
32 Accessed July 10, 2018.  
33 34. de Vet HC, Mokkink LB, Terwee CB, et al. Clinicians are right not to like Cohen's kappa. *Bmj.*  
34 2013;346:f2125.  
35 35. Huang AR, Mallet L. Prescribing opioids in older people. *Maturitas.* 2013;74(2):123-9.  
36 36. Aronson JK. Balanced prescribing - principles and challenges. *Br J Clin Pharmacol.* 2012;74(4):566-  
37 72.  
38 37. Wallwork RS, Chipidza FE, Stern TA. Obstacles to the prescription and use of opioids. *Prim Care*  
39 *Companion CNS Disord.* 2016;18(1):doi: 10.4088/PCC.15f01900.  
40 38. Scott IA, Pillans PI, Barras M, et al. Using EMR-enabled computerized decision support systems to  
41 reduce prescribing of potentially inappropriate medications: a narrative review. *Ther Adv Drug Saf.*  
42 2018;9(9):559-73.  
43 39. Clyne B, Bradley MC, Hughes C, et al. Electronic prescribing and other forms of technology to  
44 reduce inappropriate medication use and polypharmacy in older people: a review of current  
45 evidence. *Clin Geriatr Med.* 2012;28(2):301-22.  
46 40. Durieux P, Trinquart L, Colombet I, et al. Computerized advice on drug dosage to improve  
47 prescribing practice. *Cochrane Database Syst Rev.* 2008(3):Cd002894.  
48 41. Minkowitz HS, Scranton R, Gruschkus SK, et al. Development and validation of a risk score to  
49 identify patients at high risk for opioid-related adverse drug events. *J Manag Care Spec Pharm.*  
50 2014;20(9):948-58.  
51 42. Hinderer MA-Ohoo, Boeker M, Wagner SA, et al. Integrating clinical decision support systems for  
52 pharmacogenomic testing into clinical routine - a scoping review of designs of user-system  
53 interactions in recent system development. (1472-6947 (Electronic)).

- 1  
2  
3 43. Agarwal D, Udoji MA, Trescot A. Genetic testing for opioid pain management: a primer. *Pain Ther.* 2017;6(1):93-105.
- 4  
5 44. Simonsen BO, Daehlin GK, Johansson I, et al. Differences in medication knowledge and risk of  
6 errors between graduating nursing students and working registered nurses: comparative study. *BMC*  
7 *Health Serv Res.* 2014;14:580.
- 8 45. Williams B, Davis S. Maths anxiety and medication dosage calculation errors: A scoping review.  
9 *Nurse Educ Pract.* 2016;20:139-46.
- 10 46. Schilp J, Boot S, de Blok C, et al. Protocol compliance of administering parenteral medication in  
11 Dutch hospitals: an evaluation and cost estimation of the implementation. *BMJ Open.*  
12 2014;4(12):e005232.
- 13 47. Schutijser B, Klopotoska JE, Jongerden I, et al. Nurse compliance with a protocol for safe  
14 injectable medication administration: comparison of two multicentre observational studies. *BMJ*  
15 *Open.* 2018;8(1):e019648.
- 16 48. Ohashi K, Dalleur O, Dykes PC, et al. Benefits and risks of using smart pumps to reduce  
17 medication error rates: a systematic review. *Drug Saf.* 2014;37(12):1011-20.
- 18 49. Murnion BP, Gnjidic D, Hilmer SN. Prescription and administration of opioids to hospital in-  
19 patients, and barriers to effective use. *Pain Med.* 2010;11(1):58-66.
- 20 50. Jho HJ, Kim Y, Kong KA, et al. Knowledge, practices, and perceived barriers regarding cancer pain  
21 management among physicians and nurses in Korea: a nationwide multicenter survey. *PLoS One.*  
22 2014;9(8):e105900.
- 23 51. AlReshidi N, Long T, Darvill A. A systematic review of the impact of educational programs on  
24 factors that affect nurses' post-operative pain management for children. *Compr Child Adolesc Nurs.*  
25 2018;41(1):9-24.
- 26 52. Furniss D, Lyons I, Franklin BD, et al. Procedural and documentation variations in intravenous  
27 infusion administration: a mixed methods study of policy and practice across 16 hospital trusts in  
28 England. *BMC Health Serv Res.* 2018;18(1):270.
- 29 53. Hollnagel E, Wears R, Braithwaite J. From safety-I to safety-II: A white paper. The Resilient  
30 Healthcare Net: published simultaneously by the University of Southern Denmark, University of  
31 Florida, USA, and Macquarie University, Australia; 2015.
- 32 54. Clay-Williams R, Hounsgaard J, Hollnagel E. Where the rubber meets the road: using FRAM to  
33 align work-as-imagined with work-as-done when implementing clinical guidelines. *Implement Sci.*  
34 2015;10:125.
- 35 55. Hanskamp-Sebregts M, Zegers M, Vincent C, et al. Measurement of patient safety: a systematic  
36 review of the reliability and validity of adverse event detection with record review. *BMJ Open.*  
37 2016;6(8):e011078.
- 38 56. Baines RJ. Intra-rater agreement in adverse event studies: stability of assessment of adverse  
39 events over time. 2018. Available at:  
40 [https://www.nivel.nl/sites/default/files/bestanden/Proefschrift\\_Rebecca\\_Baines\\_Monitoring\\_advers](https://www.nivel.nl/sites/default/files/bestanden/Proefschrift_Rebecca_Baines_Monitoring_adverse_events_in_hospitals.pdf)  
41 [e\\_events\\_in\\_hospitals.pdf](https://www.nivel.nl/sites/default/files/bestanden/Proefschrift_Rebecca_Baines_Monitoring_adverse_events_in_hospitals.pdf). Accessed June 26, 2020.
- 42 57. Hartwig SC, Denger SD, Schneider PJ. Severity-indexed, incident report-based medication error-  
43 reporting program. *Am J Hosp Pharm.* 1991;48:2611-6.
- 44 58. Verenso. Richtlijn Pijn. Herkenning en behandeling van pijn bij kwetsbare ouderen. Utrecht2016.  
45 Available at: [https://www.verenso.nl/\\_asset/\\_public/Richtlijnen\\_kwaliteit/richtlijnen/database/VER-](https://www.verenso.nl/_asset/_public/Richtlijnen_kwaliteit/richtlijnen/database/VER-003-32-Richtlijn-Pijn-deel2-v5LR.pdf)  
46 [003-32-Richtlijn-Pijn-deel2-v5LR.pdf](https://www.verenso.nl/_asset/_public/Richtlijnen_kwaliteit/richtlijnen/database/VER-003-32-Richtlijn-Pijn-deel2-v5LR.pdf). Accessed June 20, 2020.
- 47  
48  
49  
50  
51  
52  
53  
54  
55  
56  
57  
58  
59  
60



**Table 1. Patient and hospital characteristics of all reviewed patient records, including adverse events per study period and discharge status.**

|                                                  | Study period and discharge status |                 |                   |                 |                  |
|--------------------------------------------------|-----------------------------------|-----------------|-------------------|-----------------|------------------|
|                                                  | 2008                              |                 | 2011/2012         |                 | 2015/2016        |
| <b>Hospital characteristics †</b>                | <b>Discharged</b>                 | <b>Deceased</b> | <b>Discharged</b> | <b>Deceased</b> | <b>Deceased</b>  |
| <b>Number of patient records, n</b>              | 2016                              | 2007            | 2023              | 2025            | 2846             |
| <b>General hospital, n records (%)</b>           | 1013 (50)                         | 1015 (51)       | 794 (39)          | 813 (40)        | 1197 (42)        |
| <b>Tertiary teaching hospital, n records (%)</b> | 608 (30)                          | 593 (30)        | 822 (41)          | 820 (40)        | 1052 (37)        |
| <b>Academic hospital, n records (%)</b>          | 395 (20)                          | 399 (20)        | 407 (20)          | 392 (19)        | 597 (21)         |
|                                                  | <b>2008</b>                       |                 | <b>2011/2012</b>  |                 | <b>2015/2016</b> |
| <b>Patient characteristics †</b>                 | <b>Discharged</b>                 | <b>Deceased</b> | <b>Discharged</b> | <b>Deceased</b> | <b>Deceased</b>  |
| <b>Male sex, n (%)</b>                           | 999 (50)                          | 1067 (53)       | 1027 (51)         | 1062 (52)       | 1524 (54)        |
| <b>Age (years), median (IQR)</b>                 | 62 (47-75)                        | 77 (67-84)      | 63 (48-75)        | 77 (68-84)      | 77 (68-85)       |
| <b>Length of stay (days), median (IQR)</b>       | 4 (2-8)                           | 7 (3-14)        | 3 (2-7)           | 6 (2-13)        | 4 (1-11)         |
| <b>Non-elective admission, n (%)</b>             | 1038 (51)                         | 1708 (85)       | 1063 (53)         | 1775 (88)       | 2496 (88)        |
| <b>Admission department, n (%)</b>               |                                   |                 |                   |                 |                  |
| Surgery                                          | 481 (24)                          | 276 (14)        | 472 (23)          | 239 (12)        | 340 (12)         |
| Cardiology                                       | 290 (14)                          | 291 (15)        | 272 (13)          | 247 (12)        | 360 (13)         |
| Internal medicine                                | 364 (18)                          | 599 (30)        | 365 (18)          | 597 (29)        | 876 (31)         |
| Orthopaedics                                     | 226 (11)                          | 33 (2)          | 225 (11)          | 26 (1)          | 29 (1)           |
| Neurology                                        | 150 (7)                           | 219 (11)        | 133 (7)           | 193 (10)        | 269 (9)          |
| Lung diseases                                    | 117 (6)                           | 259 (13)        | 126 (6)           | 300 (15)        | 347 (12)         |
| Urology                                          | 109 (5)                           | 18 (1)          | 111 (5)           | 28 (1)          | 23 (1)           |
| Other                                            | 279 (14)                          | 312 (16)        | 319 (16)          | 395 (20)        | 602 (21)         |
| <b>Underwent invasive procedure, n (%)</b>       | 925 (46)                          | 423 (21)        | 918 (45)          | 403 (20)        | 461 (16)         |
| <b>Adverse event occurrence §¶</b>               |                                   |                 |                   |                 |                  |
| AE, n (%)                                        | 161 (8)                           | 351 (16)        | 157 (8)           | 259 (12)        | 312 (10)         |
| ADE, n (% within population)                     | 37 (2)                            | 93 (4)          | 40 (2)            | 76 (4)          | 111 (4)          |
| ADE, n (% within adverse event)                  | 37 (23)                           | 93 (27)         | 40 (25)           | 76 (29)         | 111 (36)         |
| ORADE, n (% within population)                   | 1 (0)                             | 7 (0)           | 2 (0)             | 8 (0)           | 10 (0)           |
| ORADE, n (% within ADEs)                         | 1 (3)                             | 7 (8)           | 2 (5)             | 8 (11)          | 10 (9)           |

† Presented on patient record level.  
§ Presented on AE level.  
¶ Total number of AEs: 1240, total number of ADEs: 357, total number of opioid related ADEs: 28  
AE = Adverse event, ADE = Adverse drug event, ORADE = Opioid related adverse drug event, IQR = Interquartile range

| <b>Table 2. Characteristics of patients (n=27) with ORADEs (n=28)<sup>†</sup></b>                                                 |            |
|-----------------------------------------------------------------------------------------------------------------------------------|------------|
| <b>Patient characteristics</b>                                                                                                    |            |
| <b>Patients with an ADE, n</b>                                                                                                    | 27         |
| <b>Male sex, n (%)</b>                                                                                                            | 11 (41)    |
| <b>Age, median years (IQR)</b>                                                                                                    | 76 (66-83) |
| <b>Length of stay, median days (IQR)</b>                                                                                          | 7 (4-16)   |
| <b>Non-elective admission, n (%)</b>                                                                                              | 19 (70)    |
| <b>Terminally ill prior to admission, n (%)</b>                                                                                   | 6 (22)     |
| <b>Total number of medical specialists</b>                                                                                        |            |
| 0, n (%)                                                                                                                          | 0 (0)      |
| 1, n (%)                                                                                                                          | 4 (15)     |
| 2, n (%)                                                                                                                          | 2 (7)      |
| 3, n (%)                                                                                                                          | 21 (78)    |
| <b>Primary specialisation during admission</b>                                                                                    |            |
| Surgical, n (%)                                                                                                                   | 7 (26)     |
| Non-surgical, n (%)                                                                                                               | 20 (74)    |
| <b>Underwent invasive procedure, n (%)</b>                                                                                        | 9 (33)     |
| <b>Co-morbidity<sup>§</sup></b>                                                                                                   |            |
| No co-morbidity, n (%)                                                                                                            | 0 (0)      |
| Minor co-morbidity, n (%)                                                                                                         | 3 (11)     |
| Moderate co-morbidity, n (%)                                                                                                      | 5 (19)     |
| Significant co-morbidity, n (%)                                                                                                   | 19 (70)    |
| <sup>†</sup> Presented on patient level.                                                                                          |            |
| <sup>§</sup> The level of co-morbidity was assessed by the experts after careful review of the information in the patient record. |            |
| ADE = Adverse drug event, ORADEs = Opioid related adverse drug events                                                             |            |

| <b>Table 3. Clinical context of ORADEs (n=28)<sup>†</sup></b>                                                                                                                                                                                                                                                                                                                                                                                                                                                                                                                                                                                                                                                                                                                                                                                                    |                                                    |                                                |
|------------------------------------------------------------------------------------------------------------------------------------------------------------------------------------------------------------------------------------------------------------------------------------------------------------------------------------------------------------------------------------------------------------------------------------------------------------------------------------------------------------------------------------------------------------------------------------------------------------------------------------------------------------------------------------------------------------------------------------------------------------------------------------------------------------------------------------------------------------------|----------------------------------------------------|------------------------------------------------|
| <b>Clinical context</b>                                                                                                                                                                                                                                                                                                                                                                                                                                                                                                                                                                                                                                                                                                                                                                                                                                          | <b>Non-preventable<sup>§</sup><br/>ADEs (n=17)</b> | <b>Preventable<sup>§</sup><br/>ADEs (n=11)</b> |
| <b>Type of hospital</b>                                                                                                                                                                                                                                                                                                                                                                                                                                                                                                                                                                                                                                                                                                                                                                                                                                          |                                                    |                                                |
| University, n ADEs (%)                                                                                                                                                                                                                                                                                                                                                                                                                                                                                                                                                                                                                                                                                                                                                                                                                                           | 1 (6)                                              | 1 (9)                                          |
| Tertiary teaching, n ADEs (%)                                                                                                                                                                                                                                                                                                                                                                                                                                                                                                                                                                                                                                                                                                                                                                                                                                    | 6 (35)                                             | 4 (36)                                         |
| General, n ADEs (%)                                                                                                                                                                                                                                                                                                                                                                                                                                                                                                                                                                                                                                                                                                                                                                                                                                              | 10 (59)                                            | 6 (55)                                         |
| <b>Weekend or National holiday (yes), n (%)</b>                                                                                                                                                                                                                                                                                                                                                                                                                                                                                                                                                                                                                                                                                                                                                                                                                  | 5 (31)                                             | 2 (18)                                         |
| <b>Moment</b>                                                                                                                                                                                                                                                                                                                                                                                                                                                                                                                                                                                                                                                                                                                                                                                                                                                    |                                                    |                                                |
| 8am-5pm, n (%)                                                                                                                                                                                                                                                                                                                                                                                                                                                                                                                                                                                                                                                                                                                                                                                                                                                   | 6 (35)                                             | 5 (45)                                         |
| 5pm-11pm, n (%)                                                                                                                                                                                                                                                                                                                                                                                                                                                                                                                                                                                                                                                                                                                                                                                                                                                  | 3 (18)                                             | 0 (0)                                          |
| 11pm-8am, n (%)                                                                                                                                                                                                                                                                                                                                                                                                                                                                                                                                                                                                                                                                                                                                                                                                                                                  | 2 (12)                                             | 3 (27)                                         |
| Cannot be assessed, n (%)                                                                                                                                                                                                                                                                                                                                                                                                                                                                                                                                                                                                                                                                                                                                                                                                                                        | 6 (35)                                             | 3 (27)                                         |
| <b>Type of Opioid (ATC code)</b>                                                                                                                                                                                                                                                                                                                                                                                                                                                                                                                                                                                                                                                                                                                                                                                                                                 |                                                    |                                                |
| Opioid anesthetics (N01AH03), n (%)                                                                                                                                                                                                                                                                                                                                                                                                                                                                                                                                                                                                                                                                                                                                                                                                                              | 2 (12)                                             | 1 (9)                                          |
| Natural opium alkaloids (N02AA), n (%)                                                                                                                                                                                                                                                                                                                                                                                                                                                                                                                                                                                                                                                                                                                                                                                                                           | 9 (53)                                             | 8 (73)                                         |
| Natural opium alkaloids and Phenylpiperidine derivatives (N02AA/N02AB, combination), n (%)                                                                                                                                                                                                                                                                                                                                                                                                                                                                                                                                                                                                                                                                                                                                                                       | 1 (6)                                              | 1 (9)                                          |
| Phenylpiperidine derivatives (N02AB), n (%)                                                                                                                                                                                                                                                                                                                                                                                                                                                                                                                                                                                                                                                                                                                                                                                                                      | 2 (12)                                             | 0 (0)                                          |
| Other opioids (N02AX), n (%)                                                                                                                                                                                                                                                                                                                                                                                                                                                                                                                                                                                                                                                                                                                                                                                                                                     | 1 (6)                                              | 0 (0)                                          |
| Drugs used in opioid dependence (N07BC), n (%)                                                                                                                                                                                                                                                                                                                                                                                                                                                                                                                                                                                                                                                                                                                                                                                                                   | 2 (12)                                             | 1 (9)                                          |
| <b>Attributable factors<sup>¶</sup></b>                                                                                                                                                                                                                                                                                                                                                                                                                                                                                                                                                                                                                                                                                                                                                                                                                          |                                                    |                                                |
| Technical, n (%)                                                                                                                                                                                                                                                                                                                                                                                                                                                                                                                                                                                                                                                                                                                                                                                                                                                 | 0 (0)                                              | 0 (0)                                          |
| Care related, n (%)                                                                                                                                                                                                                                                                                                                                                                                                                                                                                                                                                                                                                                                                                                                                                                                                                                              | 3 (19)                                             | 8 (80)                                         |
| Organizational, n (%)                                                                                                                                                                                                                                                                                                                                                                                                                                                                                                                                                                                                                                                                                                                                                                                                                                            | 2 (13)                                             | 4 (40)                                         |
| Patient related, n (%)                                                                                                                                                                                                                                                                                                                                                                                                                                                                                                                                                                                                                                                                                                                                                                                                                                           | 10 (63)                                            | 6 (60)                                         |
| Violation, n (%)                                                                                                                                                                                                                                                                                                                                                                                                                                                                                                                                                                                                                                                                                                                                                                                                                                                 | 0 (0)                                              | 1 (10)                                         |
| Cannot be assessed, n (%)                                                                                                                                                                                                                                                                                                                                                                                                                                                                                                                                                                                                                                                                                                                                                                                                                                        | 3 (19)                                             | 1 (10)                                         |
| Other, n (%)                                                                                                                                                                                                                                                                                                                                                                                                                                                                                                                                                                                                                                                                                                                                                                                                                                                     | 1 (6)                                              | 0 (0)                                          |
| <p><sup>†</sup> Presented on adverse event level.</p> <p><sup>§</sup> Preventability was scored on a 6-point Likert scale: 1 = (almost) no evidence of preventability; 2 = small indications for preventability; 3 = preventability not very likely, less than 50% but 'close call'; 4 = Preventability more than likely, more than 50% but 'close call'; 5 = strong indications for preventability; 6 = (almost) certain indications of preventability. Not preventable ADEs were scored at 1-3, preventable ADEs were scored at 4-6.</p> <p><sup>¶</sup> These variables were missing for 2 patients; one in the preventable group and one in the non-preventable group. Moreover, it was possible to select more than one option for this question.</p> <p>ADE = Adverse drug event, ORADE = Opioid related adverse drug event, IQR = Interquartile range</p> |                                                    |                                                |

| <b>Box 1. Descriptions of the 28 opioid related adverse drug events divided into preventable and non-preventable.</b> |                                                                                                                                                                                                                                                                                                                                                                                                         |                                                                             |
|-----------------------------------------------------------------------------------------------------------------------|---------------------------------------------------------------------------------------------------------------------------------------------------------------------------------------------------------------------------------------------------------------------------------------------------------------------------------------------------------------------------------------------------------|-----------------------------------------------------------------------------|
| <b>Case</b>                                                                                                           | <b>Description<sup>†</sup></b>                                                                                                                                                                                                                                                                                                                                                                          | <b>Preventability score (1-6)<sup>‡</sup> and type of error<sup>§</sup></b> |
| <b>Preventable opioid related ADEs</b>                                                                                |                                                                                                                                                                                                                                                                                                                                                                                                         |                                                                             |
| <i>Cause: Dosing errors</i>                                                                                           |                                                                                                                                                                                                                                                                                                                                                                                                         |                                                                             |
| 1                                                                                                                     | Male, 90-99 years, admitted with pain after a fall. Oxycodone for the pain was unintentionally prescribed twice instead of once and also administered twice (dose unknown). This resulted in drowsiness.                                                                                                                                                                                                | 6<br>(prescribing error)                                                    |
| 2                                                                                                                     | Male, 60-69 years, suffering from colon cancer and liver metastases, was admitted for optimizing his analgesics medication. On returning from his weekend leave, he was diagnosed with oxycodone intoxication. During hospital stay, he received a too high dose of the opioid antagonist naloxone (1 mg instead of the ordered 0,4 mg) which caused confusion and agitation.                           | 6<br>(administration error)                                                 |
| 3                                                                                                                     | Female, 70-79 years, admitted with a pelvic fracture after a fall. A too high dose (dose unknown) of oxycodone was prescribed and administered resulting in hypotension and drowsiness. Consequently, she needed to be transferred to the intensive care unit.                                                                                                                                          | 5<br>(prescribing error)                                                    |
| 4                                                                                                                     | Female, 80-89 years, admitted with malaise after a fall. During her admission she received a too high dose of morphine. In her patient record, the morphine was ordered as 'as needed' (PRN). In the medication list, the morphine was ordered '6 times a day' (dose unknown). This resulted in drowsiness.                                                                                             | 5<br>(prescribing error)                                                    |
| 5                                                                                                                     | Female, 70-79 years, admitted for a plastic surgery. A high dose of intravenous administered anesthetic/pain medication (dose and medication type unknown) caused hypoventilation and a myocardial infarct. The myocardial infarct was discovered too late. She was resuscitated and ventilated. Her death was possibly caused by a hospital acquired pneumonia.                                        | 5<br>(administration error)                                                 |
| 6                                                                                                                     | Female, 50-59 years, admitted due to an aspiration pneumonia, was administered morphine. The pump mode was set at 13 ml/hour instead of 8 ml/hour as ordered. This possibly resulted in an epileptic insult requiring ventilation.                                                                                                                                                                      | 5<br>(administration error)                                                 |
| 7                                                                                                                     | Male, 60-69 years, re-admitted to the hospital due to a collapse at home. He was previously hospitalized for treatment of rib fractures and COPD Gold IV. At discharge, the doses of fentanyl and oxycodone had been significantly increased to 20 mg 4 to 6 times a day. Monitoring the effects of increasing these opioid doses was not conducted.                                                    | 4<br>(prescribing error)                                                    |
| 8                                                                                                                     | Female, 80-89 years, admitted with osteoporosis, received at home 5 mg morphine twice daily for her back pain. The dosage was increased to subcutaneous of 5 mg 4 times a day during hospital stay. Three days later, a paralytic ileus was discovered. A lower morphine dose was more appropriate for this elderly female.                                                                             | 4<br>(prescribing error)                                                    |
| 9                                                                                                                     | Female, 80-89 years, admitted with abdominal pain due to a kidney bleeding. She received morphine injections daily, varying from 2-6 subcutaneous injections of 2,5 mg per day along with transdermal fentanyl 12 mcg hourly. Severe hypercapnia eventually caused her death.                                                                                                                           | 4<br>(prescribing error)                                                    |
| 10                                                                                                                    | Male, 0-9 years, with Down syndrome, was acutely ill due to a laryngitis. He was difficult to ventilate and received antibiotics and sedatives including opioids. He was transferred to another hospital following detubation. Here, his methadone intake was reduced resulting in a delirium (dose unknown). Initially he improved, but one day unexpectedly he was found dead. It is unclear why this | 4<br>(unknown)                                                              |

|                                            |                                                                                                                                                                                                                                                                                                                                                                                 |                                             |
|--------------------------------------------|---------------------------------------------------------------------------------------------------------------------------------------------------------------------------------------------------------------------------------------------------------------------------------------------------------------------------------------------------------------------------------|---------------------------------------------|
|                                            | patient received methadone, but reducing the methadone intake may have been the problem.                                                                                                                                                                                                                                                                                        |                                             |
| <i>Cause: Incorrect decision making</i>    |                                                                                                                                                                                                                                                                                                                                                                                 |                                             |
| 11                                         | Female, 60-69 years, admitted for a laminectomy. Postoperatively she developed an ileus caused by severe constipation aggravated by administered morphine. Macrogol oral suspension (dose unknown) instead of an enema was given as treatment, which was insufficient to resolve the ileus and colon perforation occurred. Untreatable abdominal septic complications followed. | 4<br>(unknown)                              |
| <b>Non-preventable opioid related ADEs</b> |                                                                                                                                                                                                                                                                                                                                                                                 |                                             |
| 12                                         | Female, 80-89 years, admitted due to a total knee replacement. Postoperatively, drowsiness, hypotension and oliguria occurred, possibly caused by the epidural medication sufentanil (dose unknown). This may have led to a small asymptomatic myocardial infarct.                                                                                                              | 3<br>(administration error)                 |
| 13                                         | Male, 80-89 years, admitted with a perforated stomach ulcer and known stomach cancer. His extreme, not previously known, sensitivity to morphine postoperatively (dose unknown) resulted in recurrent apnea.                                                                                                                                                                    | 3<br>(other error)                          |
| 14                                         | Female, 60-69 years, suffering from lung cancer, was admitted with severe back and limb pain related to bone metastases. She was treated with transdermal fentanyl 300 mcg per hour. This resulted in drowsiness and hypoventilation.                                                                                                                                           | 2<br>(prescribing error)                    |
| 15                                         | Female, 80-89 years, known with breast cancer and multiple lung metastases. She received tramadol (dose unknown) for the pain which have been stopped due to drowsiness.                                                                                                                                                                                                        | 2<br>(unknown)                              |
| 16                                         | Male, 70-79 years, admitted with severe heart failure. He received morphine 2.5 mg for the pain. As a result of increased, not previously known, sensitivity to morphine, his saturation dropped.                                                                                                                                                                               | 2<br>(other error)                          |
| 17                                         | Male, 90-99 years, admitted because of a stroke and a lot of pain. The nurse administered 10% of the prescribed dose (dose unknown) of morphine on two occasions which caused unnecessary suffering.                                                                                                                                                                            | 2<br>(administration error)                 |
| 18                                         | Male, 60-69 years, admitted for surgery due to an ileus. Postoperative complications included an exacerbation COPD and a hospital acquired pneumonia after receiving morphine (dose unknown).                                                                                                                                                                                   | 2<br>(unknown)                              |
| 19                                         | Female, 60-69 years, admitted with a reoccurrence of drowsiness, hypoventilation and difficult to wake up which was the result of a dose of 5 mg of methadone being administered in the hospital.                                                                                                                                                                               | 2<br>(prescribing and administration error) |
| 20                                         | Female, 60-69 years, had a blood pressure drop following the administration of morphine (dose unknown) in the recovery room.                                                                                                                                                                                                                                                    | 1<br>(other error)                          |
| 21                                         | Female, 70-79 years, admitted with pain related to severe Kahler disease. For the pain, she received opioids (unknown which type and dose). The opioids caused drowsiness and because of the drowsiness, she choked once. This caused a pneumonia. The patient deceased during hospitalization.                                                                                 | 1<br>(other error)                          |
| 22                                         | Male, 70-79 years, received transdermal fentanyl and oxycodone 5 mg daily up to 6 times due to metastases in the hip. This caused apraxia and confusion.                                                                                                                                                                                                                        | 1<br>(unknown)                              |
| 23                                         | Female, 80-89 year, admitted for occlusion of an artery in her leg. She received a morphine infusion (0.5-1.0 mg/hour) causing hypoventilation with a good response to naloxone.                                                                                                                                                                                                | 1<br>(administration error)                 |
| 24                                         | Male, 80-89 years, admitted due to obstructive laryngeal cancer, was prescribed anticoagulants. This resulted in a hematoma along with severe abdominal pain for which he received morphine (dose unknown) after which he deceased.                                                                                                                                             | 1<br>(other error)                          |
| 25                                         | Male, 60-69 years, admitted with an acute respiratory insufficiency due to pneumonia. He received methadone 20 mg 2 times a day, causing hypoventilation on two occasions. This needed to be treated with naloxone.                                                                                                                                                             | 1<br>(prescribing error)                    |

|    |                                                                                                                                                                                                                                                                                                  |                          |
|----|--------------------------------------------------------------------------------------------------------------------------------------------------------------------------------------------------------------------------------------------------------------------------------------------------|--------------------------|
| 26 | Female, 80-89 years, suffered from pain due to rib fractures caused by resuscitation. She received sufentanil (dose unknown), which led to bronchospasm.                                                                                                                                         | 1<br>(unknown)           |
| 27 | Female, 70-79 years, admitted with pain related to breast cancer. During the admission, it became apparent that she had metastases along with femur and vertebral fractures. A high dose of morphine (dose unknown) was necessary to relieve her pain which consequently resulted in a delirium. | 1<br>(prescribing error) |
| 28 | Female, 80-89 years, admitted due to a hip fracture and pain. For her restlessness and pain she was administered 1 mg morphine which probably caused a reduced level of consciousness.                                                                                                           | 1<br>(other error)       |

*† Patients were categorized in age groups of ten years to avoid traceability.*

*‡ Preventability was scored on a 6-point Likert scale: 1 = (almost) no evidence of preventability; 2 = small indications for preventability; 3 = preventability not very likely, less than 50% but 'close call'; 4 = Preventability more than likely, more than 50% but 'close call'; 5 = strong indications for preventability; 6 = (almost) certain indications of preventability.*

*§ For the judgment on preventability and type of error, the experts had access to all information in the electronic patient record and therefore to the whole context in which ADEs occurred. The types of error were: prescribing error, administration error, other error (e.g. side-effects) or unknown.*

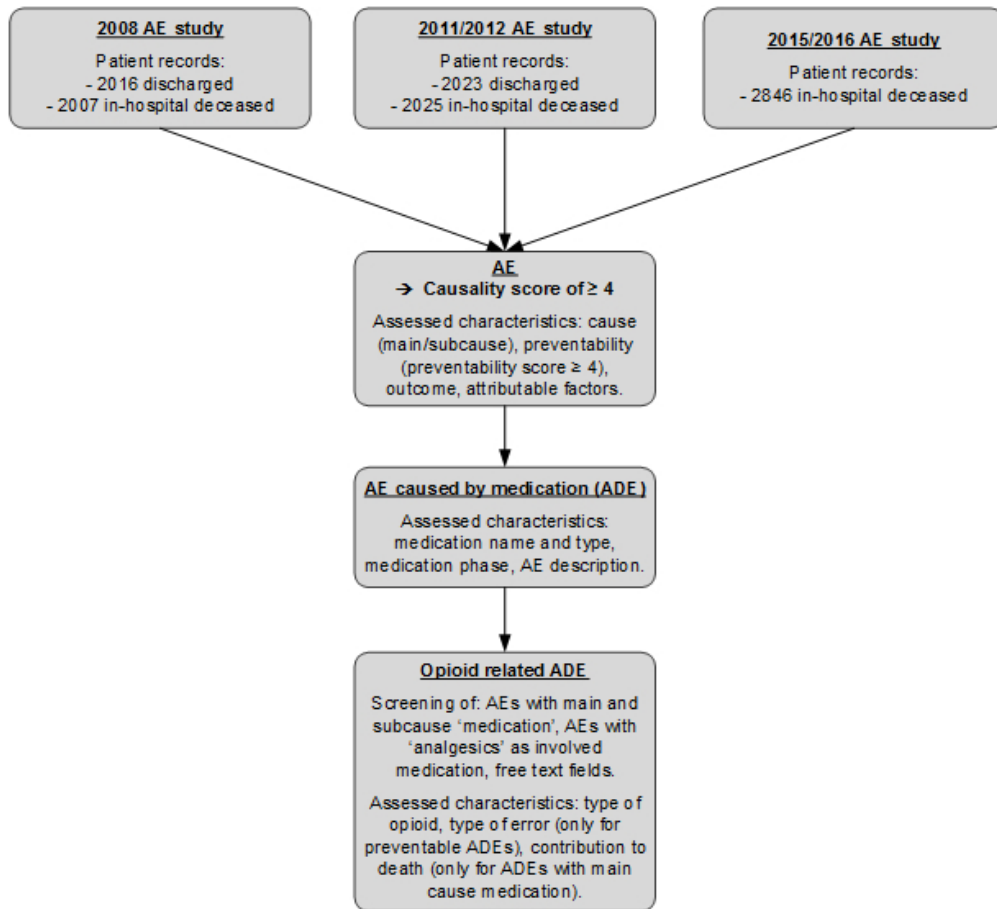

**Figure 1:** Overview of the three Dutch adverse event studies and our study.

| Supplemental Table 1: Positive and negative agreement (%) between nurses and physicians during the adverse events studies. <sup>†‡</sup> |                    |                    |                            |                    |                             |                    |
|------------------------------------------------------------------------------------------------------------------------------------------|--------------------|--------------------|----------------------------|--------------------|-----------------------------|--------------------|
|                                                                                                                                          | Nurses             |                    | Physicians – adverse event |                    | Physicians - preventability |                    |
| Study                                                                                                                                    | Positive agreement | Negative agreement | Positive agreement         | Negative agreement | Positive agreement          | Negative agreement |
| 2008                                                                                                                                     | 76.0               | 89.0               | 63.3                       | 86.9               | n/a                         | n/a                |
| 2011/2012                                                                                                                                | 85.8               | 63.3               | 56.9                       | 82.9               | 73.3                        | 83.3               |
| 2015/2016                                                                                                                                | 91.5               | 68.9               | 54.3                       | 80.9               | 71.4                        | 81.0               |

<sup>†</sup> All frequencies are separately calculated by a 2x2 table:

|                     |                    | Nurse / Physician 1 |                    |
|---------------------|--------------------|---------------------|--------------------|
|                     |                    | Positive agreement  | Negative agreement |
| Nurse / Physician 2 | Positive agreement | A                   | B                  |
|                     | Negative agreement | C                   | D                  |

Positive agreement =  $(2 \times A) / ((2 \times A) + B + C)$  and negative agreement =  $(2 \times D) / ((2 \times D) + B + C)$ .

<sup>‡</sup> The interpretation of the Kappa is not straightforward, and it is influenced by the number of categories of each variable and the prevalence of the given scores. It is therefore possible that despite a high agreement, the Kappa is low. This occurs in studies with few adverse events. For this reason we chose to present positive and negative agreement frequencies. It helps to answer questions such as: 'if one expert finds a preventable adverse event, what is the probability that another expert will also find a preventable adverse event?'



**STROBE Statement**—Checklist of items that should be included in reports of *cross-sectional studies*

|                              | Item No | Recommendation                                                                                                                                                                                               | Page number |
|------------------------------|---------|--------------------------------------------------------------------------------------------------------------------------------------------------------------------------------------------------------------|-------------|
| <b>Title and abstract</b>    | 1       | (a) Indicate the study's design with a commonly used term in the title or the abstract                                                                                                                       | 1-2         |
|                              |         | (b) Provide in the abstract an informative and balanced summary of what was done and what was found                                                                                                          | 2           |
| <b>Introduction</b>          |         |                                                                                                                                                                                                              |             |
| Background/rationale         | 2       | Explain the scientific background and rationale for the investigation being reported                                                                                                                         | 4           |
| Objectives                   | 3       | State specific objectives, including any prespecified hypotheses                                                                                                                                             | 4           |
| <b>Methods</b>               |         |                                                                                                                                                                                                              |             |
| Study design                 | 4       | Present key elements of study design early in the paper                                                                                                                                                      | 4           |
| Setting                      | 5       | Describe the setting, locations, and relevant dates, including periods of recruitment, exposure, follow-up, and data collection                                                                              | 4-5         |
| Participants                 | 6       | (a) Give the eligibility criteria, and the sources and methods of selection of participants                                                                                                                  | 5           |
| Variables                    | 7       | Clearly define all outcomes, exposures, predictors, potential confounders, and effect modifiers. Give diagnostic criteria, if applicable                                                                     | 6           |
| Data sources/<br>measurement | 8*      | For each variable of interest, give sources of data and details of methods of assessment (measurement). Describe comparability of assessment methods if there is more than one group                         | 5-6         |
| Bias                         | 9       | Describe any efforts to address potential sources of bias                                                                                                                                                    | 9-10        |
| Study size                   | 10      | Explain how the study size was arrived at                                                                                                                                                                    | 4-5         |
| Quantitative variables       | 11      | Explain how quantitative variables were handled in the analyses. If applicable, describe which groupings were chosen and why                                                                                 | 6           |
| Statistical methods          | 12      | (a) Describe all statistical methods, including those used to control for confounding                                                                                                                        | 6           |
|                              |         | (b) Describe any methods used to examine subgroups and interactions                                                                                                                                          | 6           |
|                              |         | (c) Explain how missing data were addressed                                                                                                                                                                  | n.a.        |
|                              |         | (d) If applicable, describe analytical methods taking account of sampling strategy                                                                                                                           | n.a.        |
|                              |         | (e) Describe any sensitivity analyses                                                                                                                                                                        | n.a.        |
| <b>Results</b>               |         |                                                                                                                                                                                                              |             |
| Participants                 | 13*     | (a) Report numbers of individuals at each stage of study—eg numbers potentially eligible, examined for eligibility, confirmed eligible, included in the study, completing follow-up, and analysed            | 7           |
|                              |         | (b) Give reasons for non-participation at each stage                                                                                                                                                         | 4           |
|                              |         | (c) Consider use of a flow diagram                                                                                                                                                                           | n.a.        |
| Descriptive data             | 14*     | (a) Give characteristics of study participants (eg demographic, clinical, social) and information on exposures and potential confounders                                                                     | 7-8         |
|                              |         | (b) Indicate number of participants with missing data for each variable of interest                                                                                                                          | 7-8         |
| Outcome data                 | 15*     | Report numbers of outcome events or summary measures                                                                                                                                                         | 7-8         |
| Main results                 | 16      | (a) Give unadjusted estimates and, if applicable, confounder-adjusted estimates and their precision (eg, 95% confidence interval). Make clear which confounders were adjusted for and why they were included | 7-8         |

1  
2  
3  
4  
5  
6  
7  
8  
9  
10  
11  
12  
13  
14  
15  
16  
17  
18  
19  
20  
21  
22  
23  
24  
25  
26  
27  
28  
29  
30  
31  
32  
33  
34  
35  
36  
37  
38  
39  
40  
41  
42  
43  
44  
45  
46  
47  
48  
49  
50  
51  
52  
53  
54  
55  
56  
57  
58  
59  
60

|                          |    |                                                                                                                                                                            |      |
|--------------------------|----|----------------------------------------------------------------------------------------------------------------------------------------------------------------------------|------|
|                          |    | (b) Report category boundaries when continuous variables were categorized                                                                                                  | 7-8  |
|                          |    | (c) If relevant, consider translating estimates of relative risk into absolute risk for a meaningful time period                                                           | n.a. |
| Other analyses           | 17 | Report other analyses done—eg analyses of subgroups and interactions, and sensitivity analyses                                                                             | n.a. |
| <b>Discussion</b>        |    |                                                                                                                                                                            |      |
| Key results              | 18 | Summarise key results with reference to study objectives                                                                                                                   | 8    |
| Limitations              | 19 | Discuss limitations of the study, taking into account sources of potential bias or imprecision. Discuss both direction and magnitude of any potential bias                 | 9-10 |
| Interpretation           | 20 | Give a cautious overall interpretation of results considering objectives, limitations, multiplicity of analyses, results from similar studies, and other relevant evidence | 8-10 |
| Generalisability         | 21 | Discuss the generalisability (external validity) of the study results                                                                                                      | 9    |
| <b>Other information</b> |    |                                                                                                                                                                            |      |
| Funding                  | 22 | Give the source of funding and the role of the funders for the present study and, if applicable, for the original study on which the present article is based              | 11   |

n.a. = not applicable

\*Give information separately for exposed and unexposed groups.

**Note:** An Explanation and Elaboration article discusses each checklist item and gives methodological background and published examples of transparent reporting. The STROBE checklist is best used in conjunction with this article (freely available on the Web sites of PLoS Medicine at <http://www.plosmedicine.org/>, Annals of Internal Medicine at <http://www.annals.org/>, and Epidemiology at <http://www.epidem.com/>). Information on the STROBE Initiative is available at [www.strobe-statement.org](http://www.strobe-statement.org).

# BMJ Open

## The nature of adverse events with opioids in hospitalized patients: a post-hoc analysis of three patient record review studies.

|                                 |                                                                                                                                                                                                                                                                                                                                                                                                                                                                                                                            |
|---------------------------------|----------------------------------------------------------------------------------------------------------------------------------------------------------------------------------------------------------------------------------------------------------------------------------------------------------------------------------------------------------------------------------------------------------------------------------------------------------------------------------------------------------------------------|
| Journal:                        | <i>BMJ Open</i>                                                                                                                                                                                                                                                                                                                                                                                                                                                                                                            |
| Manuscript ID                   | bmjopen-2020-038037.R2                                                                                                                                                                                                                                                                                                                                                                                                                                                                                                     |
| Article Type:                   | Original research                                                                                                                                                                                                                                                                                                                                                                                                                                                                                                          |
| Date Submitted by the Author:   | 13-Aug-2020                                                                                                                                                                                                                                                                                                                                                                                                                                                                                                                |
| Complete List of Authors:       | Schutijser, Bernadette; Amsterdam UMC Locatie VUmc, Public & Occupational Health<br>Jongerden, Irene; Amsterdam UMC Locatie VUmc, Public and Occupational Health<br>Klopotowska, Joanna; Amsterdam UMC Locatie AMC, Medical Informatics<br>Moesker, Marco; Amsterdam UMC Locatie VUmc, Public and Occupational Health<br>Langelaan, Maaïke; NIVEL<br>Wagner, Cordula; NIVEL; Amsterdam UMC Locatie VUmc, Public and Occupational Health<br>de Bruijne, Martine; Amsterdam UMC Locatie VUmc, Public and Occupational Health |
| <b>Primary Subject Heading</b>: | Pharmacology and therapeutics                                                                                                                                                                                                                                                                                                                                                                                                                                                                                              |
| Secondary Subject Heading:      | Evidence based practice, Nursing                                                                                                                                                                                                                                                                                                                                                                                                                                                                                           |
| Keywords:                       | PAIN MANAGEMENT, Adverse events < THERAPEUTICS, Health & safety < HEALTH SERVICES ADMINISTRATION & MANAGEMENT, Quality in health care < HEALTH SERVICES ADMINISTRATION & MANAGEMENT                                                                                                                                                                                                                                                                                                                                        |
|                                 |                                                                                                                                                                                                                                                                                                                                                                                                                                                                                                                            |

SCHOLARONE™  
Manuscripts



I, the Submitting Author has the right to grant and does grant on behalf of all authors of the Work (as defined in the below author licence), an exclusive licence and/or a non-exclusive licence for contributions from authors who are: i) UK Crown employees; ii) where BMJ has agreed a CC-BY licence shall apply, and/or iii) in accordance with the terms applicable for US Federal Government officers or employees acting as part of their official duties; on a worldwide, perpetual, irrevocable, royalty-free basis to BMJ Publishing Group Ltd ("BMJ") its licensees and where the relevant Journal is co-owned by BMJ to the co-owners of the Journal, to publish the Work in this journal and any other BMJ products and to exploit all rights, as set out in our [licence](#).

The Submitting Author accepts and understands that any supply made under these terms is made by BMJ to the Submitting Author unless you are acting as an employee on behalf of your employer or a postgraduate student of an affiliated institution which is paying any applicable article publishing charge ("APC") for Open Access articles. Where the Submitting Author wishes to make the Work available on an Open Access basis (and intends to pay the relevant APC), the terms of reuse of such Open Access shall be governed by a Creative Commons licence – details of these licences and which [Creative Commons](#) licence will apply to this Work are set out in our licence referred to above.

Other than as permitted in any relevant BMJ Author's Self Archiving Policies, I confirm this Work has not been accepted for publication elsewhere, is not being considered for publication elsewhere and does not duplicate material already published. I confirm all authors consent to publication of this Work and authorise the granting of this licence.

**TITLE PAGE****The nature of adverse events with opioids in hospitalized patients: a post-hoc analysis of three patient record review studies.**

*Bernadette C.F.M. Schutijser, MSc<sup>1</sup>, Irene P. Jongerden, PhD<sup>1</sup>, Joanna E. Klopowska, PhD<sup>2</sup>, Marco J. Moesker, MSc<sup>1</sup>, Maaike Langelaan, PhD<sup>3</sup>, Cordula Wagner, PhD<sup>1,4</sup>, Martine C. de Bruijne, PhD<sup>1</sup>*

<sup>1</sup> Amsterdam UMC, Vrije Universiteit Amsterdam, Department of Public and Occupational Health, Amsterdam Public Health, Amsterdam, the Netherlands.

<sup>2</sup> Amsterdam UMC, Academic Medical Center Amsterdam, Department of Medical Informatics, Amsterdam, the Netherlands.

<sup>3</sup> PinkRocade Healthcare, Apeldoorn, The Netherlands.

<sup>4</sup> Netherlands Institute for Health Services Research (NIVEL), Utrecht, The Netherlands.

**Corresponding author**

Bernadette C.F.M. Schutijser, MSc, RN

Amsterdam UMC, Vrije Universiteit Amsterdam

Department of Public and Occupational Health, Amsterdam Public Health research institute

Van der Boechorststraat 7, 1081 BT Amsterdam, The Netherlands

Email: b.schutijser@amsterdamumc.nl / Telephone: +31(0)204449612

**Word count** 3730

**ABSTRACT****Objectives**

Opioids are increasingly prescribed and frequently involved in adverse drug events (ADEs). The underlying nature of opioid related ADEs (ORADEs) is however understudied. This hampers our understanding of risks related to opioid use during hospitalization and when designing interventions. Therefore, we provided a description of the nature of ORADEs.

**Design**

A post-hoc analysis of data collected during three retrospective patient record review studies (in 2008, 2011/2012 and 2015/2016).

**Setting**

The three record review studies were conducted in 32 Dutch hospitals.

**Participants**

A total of 10,917 patient records were assessed by trained nurses and physicians.

**Outcome measures**

Per identified ORADE, we described preventability, type of medication error, attributable factors and type of opioid involved. Moreover, characteristics of preventable and non-preventable ORADEs were compared to identify risk factors.

**Results**

Out of 10,917 patient records, 357 ADEs were identified of which 28 (8%) involved opioids. Eleven ORADEs were assessed as preventable. Of these, ten were caused by dosing errors and four probably contributed to the patients' death. Attributable factors identified were mainly on patient and organizational level. Morphine and oxycodone were the most frequently involved opioids. The risk for ORADEs was higher in elderly patients.

**Conclusions**

Only 8% of ADEs identified in our sample were related to opioids. Although the frequency is low, the risk of serious consequences is high. We recommend to use our findings to increase awareness among physicians and nurses. Future interventions should focus on safe dosing of opioids when prescribing and administering, especially in elderly patients.

**Keywords** Analgesia, Pain control, Adverse drug events, Hospitals, Drug Prescriptions, Opioids, ORADE

(248 words, without key-words)

### STRENGTHS AND LIMITATIONS OF THIS STUDY

- This study was based on data gathered during three national retrospective patient record review studies conducted in 2008, 2011/2012 and 2015/2016 within 32 Dutch hospitals.
- During all three studies, a broad and randomly selected sample of all hospital admissions of patients were reviewed to assess the nature and preventability of adverse drug events with opioids.
- Our study population was stratified, resulting in an overrepresentation of in-hospital deceased patients.
- The low frequency of ORADEs limited a comparison of events over time between the three study periods.

For peer review only

## TEXT

### INTRODUCTION

Over the past decades, prescription of opioids has substantially increased worldwide.<sup>1,2</sup> Moreover, the rise in addiction rates and deaths resulting from opioid overdoses have urged physicians to call out an opioid crisis.<sup>3</sup> In the Netherlands, the prescription of oxycodone has increased almost fivefold over ten years (from 96.000 users in 2008 to 485.000 users in 2018).<sup>4</sup> This increase may however not only lead to more addiction but may also affect the number of opioid related adverse drug events (ADEs) in hospitals.

Opioids are frequently involved in ADEs,<sup>5-7</sup> and approximately in 2-14% of all patients.<sup>8-12</sup> ADEs are unintended injuries from a medical intervention related to drugs.<sup>13</sup> Opioid related ADEs (ORADEs) occur frequently, specifically in pediatric,<sup>7,14</sup> palliative<sup>15</sup> and surgical patients.<sup>10,11,16</sup> ORADEs are often caused by errors such as omissions or incorrect dosing.<sup>7,14,15,17</sup> In addition, approximately 11% of ORADEs among hospitalized patients cause severe or even fatal patient harm,<sup>18</sup> also because of the fast therapeutic effects of opioids. Besides these severe consequences, ORADEs lead to significantly higher healthcare costs.<sup>9,10,16</sup>

Our current knowledge about the incidence of ORADEs and their underlying nature is mostly based on medication related incident reports.<sup>7,14,15,17</sup> However, a comprehensive patient chart review provides the most reliable information on ADEs in hospitals while incident reports suffer from severe underreporting.<sup>19,20</sup> Furthermore, ORADE studies based on incident reports were usually conducted at one point in time or within one hospital or at a specific department.<sup>7,14,15,17</sup> The few ORADE studies based on comprehensive patient chart review were mainly conducted within a surgical population.<sup>10,11,16</sup>

Therefore, and also motivated by the opioid crisis, we have conducted an in-depth analysis of ORADEs using data gathered during three consecutive national adverse event studies in the Netherlands in which patient record review was applied. To our knowledge, no such longitudinal multicenter study on ORADEs in a diverse inpatient population and using a comprehensive ADE detection method has been published. The aim of this study was to provide a detailed description of the underlying nature of ORADEs. By doing so, we hope to increase awareness and provide recommendations on how to prevent opioid related ADEs in future hospitalized patients.

### METHODS

#### Design and setting

We conducted a post-hoc analysis of data that were collected during three national retrospective patient record review studies conducted in 2008, 2011/2012 and 2015/2016. The aim of these studies was to identify AEs and ADEs in Dutch hospitals. A detailed description of the methodology used in these studies was previously published and comparable to other international AEs studies.<sup>21,22</sup> In summary, for the 2008 and 2011/2012 studies, a random sample of 20 hospitals participated. In 2015/2016, a new random sample of 19 hospitals was selected, of which seven had previously participated in two of the earlier studies. Both samples were stratified for hospital type and representation of urban and rural area. In 2008 and 2011/2012, 200 patient records per hospital were randomly selected for review; 100 records of discharged patients and 100 records of in-hospital deceased patients. The 2015/2016 study was limited to 150 in-hospital deceased patients per hospital because the frequency of preventable AEs remained unchanged for in-hospital deceased patients in both the 2008 and the 2011/2012 measurement.<sup>23-25</sup> Records of patients younger than one year and of patients admitted at the departments of psychiatry and obstetrics were excluded



1  
2  
3 because other expertise is necessary to detect AEs in these patients. The random selection of patient  
4 records was conducted by the participating hospitals with clear instructions of the researchers. The  
5 medical ethical committee of the Amsterdam UMC, Vrije Universiteit Amsterdam waived the  
6 requirement of informed consent (protocol numbers: 2005.146, 2009.130, 2016.282) as they found  
7 the scope of the study outside the Dutch Medical Research (Human Subjects) Act.  
8  
9

### 10 **Review procedure AE studies**

11 During all three AE studies, selected patient records were reviewed for the occurrence of AEs,  
12 including ADEs. In Figure 1, a schematic overview of the review process in the national studies and  
13 this study is presented. In summary, the review process consisted of two phases. In phase one, the  
14 records were screened for potential AEs by trained independent nurses. When predefined triggers  
15 were found, indicating an AE might have occurred, the record was labelled for an in-depth review by  
16 a trained independent physician. Independent means that the physicians and nurses never had an  
17 employment contract in the participating hospitals. The physicians were highly experienced and  
18 specialized in surgery, internal medicine or neurology, and during the record review studies they had  
19 access to all information in the electronic patient record. Besides, 10% of all patient records were  
20 reviewed by two physicians to determine inter-rater reliability. Validity of this scoring system has not  
21 been tested, but it has been used widely in AE studies for over 20 years and the ratings of the system  
22 did not change in that time.<sup>21-23,26-29</sup> Prior to the study, both nurses and physicians had training  
23 sessions in which cases were discussed to enhance the quality and standardization of the review  
24 process.  
25

26 An AE was defined by three criteria: 1) an unintended physical or mental injury; 2) the injury resulted  
27 in prolongation of hospital stay, temporary or permanent disability or death; 3) the injury was caused  
28 by healthcare management rather than the patient's underlying disease.<sup>23,27,28</sup> An AE was scored as  
29 caused by the healthcare (causality) if the likelihood score was equal to or greater than 4 based on a  
30 6-point Likert scale with (virtually) no evidence (1), slight to modest evidence (2), not likely, but  
31 borderline (3), more likely but borderline (4), moderate to strong evidence (5), or (virtually) certain  
32 evidence (6) of management causation. The scoring system was used in all three record review  
33 studies and the physicians made the judgments about causality and preventability based on all the  
34 available information of the patient's condition and taking into account the guidelines.  
35

36 If an AE was identified, the independent physicians (hereafter: experts) assessed each AE on:  
37 cause (diagnostic, surgery, non-invasive procedure, medication, other clinical activities, admission,  
38 and other), preventability, possible contribution to death, and attributable factors. The attributable  
39 factors were based on the taxonomy of the Eindhoven Classification Model and consisted of the main  
40 categories: technical, care, organizational, patient related, violation and other.<sup>30</sup> An AE was  
41 considered to be preventable when the care given fell below the current level of expected  
42 performance of practitioners or systems. Before the physicians answered the question about  
43 preventability, they were required to respond to 13 questions to add more structure to the review  
44 process (see Supplemental Table 1). For example, if there was a complex medical history, if the  
45 patient had co-morbidity and whether another physician would repeat this treatment. Preventability  
46 was also assessed on a 6-point Likert scale with almost no evidence (1), slight to modest evidence (2),  
47 modest evidence, but borderline (3), modest to strong evidence (4), strong evidence (5) or almost  
48 certain evidence (6) of preventability. A score of 4-6 indicated that the reviewer assessed the AE as  
49 having a greater than 50% chance of being potentially preventable.  
50  
51  
52  
53  
54  
55  
56  
57  
58  
59  
60

1  
2  
3 Furthermore, for each patient the following characteristics were registered: gender, age,  
4 length of hospital stay, urgency of admission, whether patients were terminally ill prior to the  
5 admission, the number of involved medical specialists, department of admission, type of procedure  
6 and co-morbidity. The latter was divided in no, minor, moderate and severe co-morbidity, and was  
7 assessed by the experts after careful review of the information in the patient record. Also, one  
8 organizational characteristic (type of hospital: university, tertiary teaching, or general) and one AE  
9 characteristic (weekend or holiday at the time of the AE) were registered.  
10  
11

12 When an AE was medication related (ADE), the following additional characteristics were  
13 registered by the experts: name and type of medication involved, medication phase, a description of  
14 the ADE, and whether the ADE possibly contributed to the patients' death. The medication phases  
15 were classified into ordering, transcribing, dispensing, administering and monitoring.<sup>31,32</sup> The possible  
16 contribution to the patients' death was only registered for ORADEs with 'medication' as a main cause  
17 of the event and not for ADEs with 'medication' as a sub cause.  
18  
19

20 All data were entered into a national AE database, specifically designed for the AE studies.  
21  
22

### 23 **Review procedure ORADEs**

24 For our study, we used the national AE database to identify ORADEs (Figure 1). One researcher (BS)  
25 conducted the screening of the database and retrieved several pre-selected variables: (1) AEs with  
26 the main classification cause 'medication' as well as AEs with 'medication' as a sub cause and (2) AEs  
27 with 'analgesics' as involved medication. Furthermore, two free-text fields were selected: the  
28 summary of the AEs and the preventability assessment. A second researcher (MM) independently  
29 double checked the selection procedure.  
30  
31

32 All identified ORADEs, were then classified by BS on type of opioid involved using the World  
33 Health Organization Anatomical Therapeutic Chemical (WHO ATC) classification.<sup>33</sup> For the  
34 preventable ORADEs, the type of medication error was classified according to a data driven analysis  
35 of the free-text summaries of the ADEs. The classification of ORADEs was double checked by two  
36 senior researchers (JK & IJ) and any discrepancies were resolved by consensus.  
37  
38

### 39 **Outcomes**

40 To provide insight into the nature of the ORADEs, each ORADE case was summarized by gender, age  
41 of the patient (categorized in steps of 10 years for privacy reasons), type of opioid involved,  
42 attributable factors and preventability. When the ORADE was preventable, then the type of  
43 medication error and medication phase was also described. Furthermore, in order to identify risk  
44 factors, we compared the outcome variables between preventable and non-preventable ORADEs.  
45  
46  
47

### 48 **Data analysis**

49 Only descriptive statistics were used in this study. Descriptives are presented as median (age and  
50 length of hospital stay) or frequency (gender, comorbidity, type of opioid and attributable factor,  
51 etc.). Patient and hospital characteristics are presented on a patient level and ORADE characteristics  
52 are presented on AE level. Inter-rater reliability among nurses and physicians was addressed in terms  
53 of positive and negative agreement frequencies.<sup>34</sup> All analyses were conducted using STATA version  
54 14.1 (StataCorp, TX) and double checked by a second researcher (MM) and a statistician (PS).  
55  
56  
57

58 **Patient and Public Involvement statement** Patients or the public were not involved in the design, or  
59 conduct, or reporting, or dissemination plans of our research.  
60

## RESULTS

In total, 10,917 records were screened during the three AE studies. The patient records of discharged and deceased patients were equally distributed among male and female patients. Most patients were hospitalized for a non-elective procedure (Table 1). In 1150 patient records, at least one AE was detected, with a total of 1240 AEs. When detecting the predefined triggers, positive agreement between nurses varied between 76.0-91.5%. When detecting the adverse events, positive agreement between physicians varied between 53.4-63.3%. For assessing the preventability positive agreement between physicians varied between 71.4-73.3%. Overall, agreement frequencies were moderate. More detailed information about the inter-rater reliability is presented in Supplemental Table 2.

### Opioid related ADEs

Of 1240 AEs, 357 (29%) were medication related (ADEs). In 28 (8%) ADEs, opioids were involved. These ADEs are summarized in detail in Box 1, and included 24 ADEs with 'medication' as a main cause and four ADEs with 'medication' as a sub cause. The ORADEs occurred in 27 patients; one patient experienced two ORADEs. Most patients with ORADEs involved females (59%). Median age of the patients was 76 years (Inter Quartile Range (IQR): 66-83) and median length of hospital stay was 7 days (IQR: 4-16). Most patients had moderate to significant co-morbidity (70%) and had three medical specialists during the admission (78%) (Table 2).

### Nature of opioid related ADEs: preventability

According to the experts, 11 (39%) out of the 28 ORADEs were considered as potentially preventable (Table 3). Non-preventable (31%) ORADEs occurred slightly more during weekends and holidays than preventable ADEs (18%). Moreover, most preventable and non-preventable ORADEs occurred during dayshifts (8am-5pm).

### Nature of opioid related ADEs: medication errors & phase

Of the 11 potentially preventable ORADEs, 10 (91%) were caused by dosing errors of which six during the prescribing phase (cases #1, #3, #7, #8, #9, #10) and four during the administration phase (cases #2, #4, #5, #6) (Box 1). Of the ten dosing errors, six occurred in elderly patients ( $\geq 70$  years) (cases #1, #3, #4, #5, #8, #9), and two around the patients' discharge (cases #2, #7). The remaining one preventable ORADE (#11) was related to incorrect decision making. Finally, the experts assessed the consequences of the ORADEs (multiple options possible). In eight ORADEs, an intervention or extra treatment was needed, in two ORADEs the patients had a prolonged hospital stay and four preventable ORADEs possibly contributed to the death of the patient (cases #5, #6, #8, #9).

### Nature of opioid related ADEs: attributable factors

The attributable factors involved in ORADEs were care (knowledge, skills, monitoring, verification, and coordination of care) and patient related (co-morbidity, age, a demanding patient or a patient with an intellectual disability) (Table 3). Of preventable ORADEs, 8 were care related and 6 were patient related. For non-preventable ORADEs, 3 were care related and 10 were patient related. However, in 3 of the cases of non-preventable ORADEs, the attributable factors could not be assessed by the experts due to insufficient information in the patient records.

### Nature of opioid related ADEs: medication involved

Eight out of the eleven preventable ADEs occurred with opioids with ATC code N02AA which are morphine and oxycodone (Table 3). Non-preventable ORADEs occurred with opioids mainly with ATC code N02AA (morphine and oxycodone, 53%).

### DISCUSSION

In three national patient record studies with 4 years intervals, we found 28 ADEs caused by opioids. These ADEs correspond with 8% of all identified ADEs and 0.3% of all studied patient records. Eleven of the 28 opioid related ADEs (ORADEs) (39%) were assessed as potentially preventable, involving mostly morphine and oxycodone. Dosing errors, during the prescription and administration phase were the most common cause of preventable ORADEs, and occurred most often in elderly patients. Four preventable ORADEs probably contributed to the patients' death. Finally, attributable factors for the ADEs were mostly care and patient related.

In this study, the percentage of ORADEs of all patient records (0.3%) was low, also in comparison with previously conducted ORADE studies that focused on large populations (11-14%).<sup>10,11,16</sup> However, two of these studies were based on large databases and all involved surgical patients who often receive opioids post-operative. We focused on a broad hospitalized patient population, both surgical and non-surgical. Furthermore, the difference in ORADE occurrence might be explained by differences in the used ADE definition. For example, instead of using all ORADEs, i.e. including side-effects of opioids, in our study only ADEs that resulted in severe patient harm were included. This means that ADEs resulted in prolongation of hospital stay, temporary or permanent disability or death. Furthermore, only ADEs with a causality likelihood score of equal or greater than 4 were included, which means that the experts indicated an ADE as having a greater than 50% chance of being caused by healthcare. Should we have selected the cases with causality likelihood scores of 1-3 as well, then we could determine at least 2500 additional cases on whether medication and opioids were related. However, we did not determine these 2500 cases, since we wanted to stay true to the definition of an AE (at least 4 on the 6-point Likert scale) and we did not consider it ethical to change the method of the study afterwards.

In line with previous studies,<sup>7,14,15,17</sup> we found that dosing errors during prescribing and administering were the main cause of preventable ORADEs. Furthermore, 60% of the dosing errors in our study occurred in elderly patients ( $\geq 70$  years). In general, prescribing medication for elderly patients is challenging since polypharmacy, multi-morbidity and altered pharmacokinetics and pharmacodynamics of drugs are often present. Besides, this population will rapidly increase in the upcoming years. Specifically related to opioids, physicians also need to be aware of the higher sensitivity of elderly patients to the effects of opioids,<sup>35</sup> and balancing between minimizing the risk of addiction and side-effects while effectively relieving pain.<sup>36,37</sup> Taking into account all these factors while prescribing, demands a lot from physicians during their busy daily hospital practice. A clinical decision support system (CDSS), can help physicians in this complex task by showing warnings and advices during prescribing, for example showing the most appropriate choice of medication for a given condition and/or by providing dosing recommendations. CDSS has shown to effectively reduce prescribing errors among hospitalized elderly patients<sup>38,39</sup> and errors with medications of which the therapeutic effects are fast, such as opioids.<sup>40</sup> Furthermore, a CDSS can also be effective in predicting which patients are at risk for ORADEs. Using retrospective data from gastro-intestinal surgical patients, Minkowitz et al. (2014) developed a risk-scoring model to identify patients with a high risk for experiencing an ORADE based on their clinical and demographic profiles.<sup>41</sup> If developed

1  
2  
3 specifically for elderly inpatients, such a prediction model could help physicians in determining the  
4 most appropriate and safe pain management strategy for these vulnerable patients. Finally, a CDSS  
5 could also be used to identify patients who might be suitable for pre-emptive genotyping, which  
6 involves metabolic testing prior to prescribing.<sup>42</sup> Patients with high levels of pain despite using high  
7 doses of pain medication or patients that experience severe side-effects while using common dosing  
8 schedules may especially benefit from such an intervention.<sup>43</sup>

9  
10  
11 Administering opioids is a task usually conducted by nurses. The dosing errors in our study  
12 were mostly related to injectable opioids. Error prone activities, such as calculating the concentration  
13 and administration rate,<sup>14,17</sup> require that nurses have sufficient arithmetic knowledge and follow the  
14 protocol for safe preparation and administration of injectable medication. However, in daily practice,  
15 some nurses have math anxiety and on average arithmetic knowledge of nursing students seems  
16 moderate.<sup>44,45</sup> Besides, nurse compliance with protocols for safe administration of injectable  
17 medication is considered low (around 20%)<sup>46,47</sup> and needs further attention. An intervention which  
18 might help to reduce dosing errors during opioid administration is the use of smart infusion pumps.  
19 These pumps have integrated medication libraries which allow nurses to set the pump automatically  
20 to the right administration rate during administration. By doing so, the administration rate of smart  
21 pumps can be seen as a double check of the nurses' own calculation. Smart pumps seem also  
22 effective in reducing programming errors.<sup>48</sup> Furthermore, educational programs for nurses about  
23 brand and generic names and pharmacology of opioids or side-effects might increase their  
24 knowledge and awareness of risks related to dosing during the administration of opioids.<sup>49-51</sup>

25  
26 Overall, we think the ORADE frequency of 8% of all ADEs and 0.3% of all studied patient  
27 records found in our study is low and acceptable. However, although the frequency is low, the risk of  
28 serious consequences is high. Thus, new contributions to prevent ORADEs in future hospitalized  
29 patients need to be identified. Using the Safety-2 perspective may offer new opportunities to do so.<sup>52</sup>  
30 In order to understand what happened when an adverse (drug) event occurred, it is also necessary to  
31 understand how work is done when the process goes well.<sup>53</sup> Since healthcare processes have become  
32 more complex nowadays, it may be helpful to visualize the current variable practice of prescribing  
33 and administering opioids from a multi-stakeholder perspective.<sup>54</sup>

### 34 35 36 37 38 39 40 **Strengths and limitations**

41 Opioids are in the top ten of drug types that causes fatal medication errors.<sup>8</sup> Hence, focusing on the  
42 detailed description of the nature of ORADEs was important and necessary. Another strength of this  
43 study is that it was based on a comprehensive ADE detection method and conducted in a broad  
44 sample of all hospital admissions. Most previous studies, which described the nature of ORADEs, are  
45 based on medication related incident reports. Furthermore, data were gathered over an extended  
46 period of time within a randomly selected sample of one third of all Dutch hospitals.

47  
48 This study also has some limitations. Firstly, in all three AE studies, the population consisted  
49 of relatively many older and deceased patients. Therefore, it is not possible to generalize the results  
50 to all Dutch hospital population. To make the study sample more representative for the Dutch  
51 hospital population, weighting the results (i.e. correcting for type of hospital, study period and  
52 discharge status) would be a solution which is used in previous studies of our research group.  
53 However, since the total amount of ORADEs was low, we chose not to weight our results as this had  
54 little effect and makes interpretation difficult. Secondly, overall agreement frequencies between  
55 physicians were moderate. This could have led to different assessments or different scores if other  
56 experts were involved. This should be taken into account when interpreting our results. However, a  
57  
58  
59  
60

1  
2  
3 previous review of studies focusing on assessing AEs showed also moderate to substantial inter-rater  
4 reliability.<sup>55</sup> For this reason, patient records in all Dutch AE studies have been assessed by the same  
5 experts as much as possible and over the years these experts have not become stricter or lenient in  
6 their judgment of AEs and their preventability.<sup>56</sup> Thirdly, due to this low number of ORADEs, it was  
7 not possible to compare the events over the three study periods. Therefore, we cannot conclude  
8 whether the low number is a positive finding, and if the occurrence of ORADEs increased or  
9 decreased over time. Fourthly, our post-hoc analysis was based on the information previously  
10 recorded by the experts in an AE database, and on the assessment conducted by these physicians.  
11 Therefore, some information could be missing and interpreting the assessment of preventability was  
12 difficult for us in one case, resulting in a non-preventable ORADE. Furthermore, this was also the  
13 reason that the harm could not be further categorized according to the NCCMERP Index for  
14 Categorizing Medication Errors.<sup>57</sup> Besides, the retrospective interpretation can also be biased by  
15 temporal views. The current opinion is that prescribing opioids should be minimized due to the harm  
16 of opioids, which is supported by updated guidelines.<sup>58</sup> This view changed throughout the years and  
17 may not have been recognized 15 years ago, when the focus was mainly on alleviating suffering of  
18 pain. This change in opinion may have increased alertness when prescribing or administering opioids,  
19 which could have led to less ORADEs. However, our study showed that ORADEs still occur and  
20 publishing about them could serve as a method of increasing awareness.

## 27 **CONCLUSION**

28 Only 8% of ADEs identified in our sample were related to opioids, 0.3% of all studied patient records.  
29 Although the frequency is low, the risk of serious consequences is high. We recommend to use our  
30 findings to increase awareness among physicians and nurses. Future interventions should focus on  
31 safe dosing of opioids when prescribing and administering, especially in elderly patients.  
32  
33  
34  
35  
36  
37  
38  
39  
40  
41  
42  
43  
44  
45  
46  
47  
48  
49  
50  
51  
52  
53  
54  
55  
56  
57  
58  
59  
60

1  
2  
3 **Acknowledgements** We would like to thank all participating hospitals and independent nurses and  
4 physicians for their cooperation during the data collection on the three Dutch adverse event studies.  
5 We also thank Peter Spreeuwenberg, MSc for double checking the statistical analyses and Catherine  
6 Combee - Duffy, MANP for improving the readability of this article. This study was funded by the  
7 Dutch Ministry of Health, Welfare, and Sport.  
8  
9

10 **Contributors** BS, MM, JK, ML, MdB, and CW designed the study and developed the study protocol. BS  
11 and MM organized the selection and classification of ORADEs. JK and IJ double checked this  
12 classification. BS and MM performed statistical analyses and interpreted the analytical results. BS, JK,  
13 and IJ wrote the manuscript. MdB, and CW supervised the study. All authors made critical revisions  
14 and approved the final version of the manuscript.  
15  
16  
17

18 **Funding** This study was funded by the Dutch Ministry of Health, Welfare, and Sports, with project  
19 title: Monitor Zorggerelateerde Schade 2015-2018.  
20  
21

22 **Competing interests** None declared.  
23  
24

25 **Data sharing statement** No additional data are available.  
26  
27

28 **Open Access** This is an Open Access article distributed in accordance with the Creative Commons  
29 Attribution Non Commercial (CC BY-NC 4.0) license, which permits others to distribute, remix, adapt,  
30 build upon this work non-commercially, and license their derivative works on different terms,  
31 provided the original work is properly cited and the use is non-commercial. See:  
32 <http://creativecommons.org/licenses/by-nc/4.0/>  
33  
34  
35  
36  
37  
38  
39  
40  
41  
42  
43  
44  
45  
46  
47  
48  
49  
50  
51  
52  
53  
54  
55  
56  
57  
58  
59  
60

## REFERENCES

1. Schepens MHJ, Leusink M, de Vries SE, et al. [Increase in opioid prescribing in extramural care in the Netherlands: assessment of use and prescription behaviour, based on claims data]. *Ned Tijdschr Geneeskd.* 2019;163.
2. Lyden J, Binswanger IA. The United States opioid epidemic. *Semin Perinatol.* 2019;43(3):123-31.
3. AMA. Physicians' progress to reverse the nation's opioid epidemic.: American Medical Association; 2018. Available at: <https://www.ama-assn.org/sites/default/files/media-browser/public/physicians/patient-care/opioid-task-force-progress-report.pdf>. Accessed August 8, 2018.
4. Overheid.nl. Geneesmiddelenbeleid. Den Haag, The Netherlands: Overheid.nl; 2019. Available at: <https://zoek.officielebekendmakingen.nl/kst-29477-537.html>. Accessed March 19, 2019.
5. Laatikainen O, Miettunen J, Sneck S, et al. The prevalence of medication-related adverse events in inpatients-a systematic review and meta-analysis. *Eur J Clin Pharmacol.* 2017;73(12):1539-49.
6. Mihajlovic S, Gauthier J, MacDonald E. Patient characteristics associated with adverse drug events in hospital: an overview of reviews. *Can J Hosp Pharm.* 2016;69(4):294-300.
7. Mc Donnell C. Opioid medication errors in pediatric practice: four years' experience of voluntary safety reporting. *Pain Res Manag.* 2011;16(2):93-8.
8. Saedder EA, Brock B, Nielsen LP, et al. Identifying high-risk medication: a systematic literature review. *Eur J Clin Pharmacol.* 2014;70(6):637-45.
9. Kane-Gill SL, Rubin EC, Smithburger PL, et al. The cost of opioid-related adverse drug events. *J Pain Palliat Care Pharmacother.* 2014;28(3):282-93.
10. Oderda GM, Gan TJ, Johnson BH, et al. Effect of opioid-related adverse events on outcomes in selected surgical patients. *J Pain Palliat Care Pharmacother.* 2013;27(1):62-70.
11. Kessler ER, Shah M, Gruschkus SK, et al. Cost and quality implications of opioid-based postsurgical pain control using administrative claims data from a large health system: opioid-related adverse events and their impact on clinical and economic outcomes. *Pharmacotherapy.* 2013;33(4):383-91.
12. de Vries EN, Ramrattan MA, Smorenburg SM, et al. The incidence and nature of in-hospital adverse events: a systematic review. *Qual Saf Health Care.* 2008;17(3):216-23.
13. Bates DW, Cullen DJ, Laird N, et al. Incidence of adverse drug events and potential adverse drug events. Implications for prevention. ADE Prevention Study Group. *Jama.* 1995;274(1):29-34.
14. Doherty C, Mc Donnell C. Tenfold medication errors: 5 years' experience at a university-affiliated pediatric hospital. *Pediatrics.* 2012;129(5):916-24.
15. Heneka N, Shaw T, Rowett D, et al. Opioid errors in inpatient palliative care services: a retrospective review. *BMJ Support Palliat Care.* 2018;8(2):175-79.
16. Shafi S, Collinworth AW, Copeland LA, et al. Association of opioid-related adverse drug events with clinical and cost outcomes among surgical patients in a large integrated health care delivery system. *JAMA Surg.* 2018;153(8):757-63.
17. Dy SM, Shore AD, Hicks RW, et al. Medication errors with opioids: results from a national reporting system. *J Opioid Manag.* 2007;3(4):189-94.
18. Cousins DH, Gerrett D, Warner B. A review of medication incidents reported to the national reporting and learning system in England and Wales over 6 years (2005-2010). *Br J Clin Pharmacol.* 2012;74(4):597-604.
19. Noble DJ, Pronovost PJ. Underreporting of patient safety incidents reduces health care's ability to quantify and accurately measure harm reduction. *J Patient Saf.* 2010;6(4):247-50.
20. Yung HP, Yu S, Chu C, et al. Nurses' attitudes and perceived barriers to the reporting of medication administration errors. *J Nurs Manag.* 2016;24(5):580-8.
21. Baker GR, Norton PG, Flintoft V, et al. The Canadian adverse events study: the incidence of adverse events among hospital patients in Canada. *CMAJ.* 2004;170(11):1678-86.
22. Brennan TA, Leape LL, Laird NM, et al. Incidence of adverse events and negligence in hospitalized patients. Results of the Harvard Medical Practice Study I. *N Engl J Med.* 1991;324(6):370-6.



23. Baines RJ, Langelaan M, de Bruijne MC, et al. Changes in adverse event rates in hospitals over time: a longitudinal retrospective patient record review study. *BMJ Qual Saf.* 2013;22(4):290-8.
24. Langelaan M, De Bruijne MC, Baines RJ, et al. Dutch adverse event study 2011/2012 Utrecht: NIVEL/EMGO+; 2013. Available at: [https://www.nivel.nl/sites/default/files/bestanden/monitor\\_zorggerelateerde\\_schade\\_2011\\_2012.pdf](https://www.nivel.nl/sites/default/files/bestanden/monitor_zorggerelateerde_schade_2011_2012.pdf). Accessed December 12, 2018.
25. Baines RJ, Langelaan M, de Bruijne MC, et al. Is researching adverse events in hospital deaths a good way to describe patient safety in hospitals: a retrospective patient record review study. *BMJ Open.* 2015;5(7):e007380.
26. Vincent C, Neale G, Woloshynowych M. Adverse events in British hospitals: preliminary retrospective record review. *Bmj.* 2001;322(7285):517-9.
27. Zegers M, de Bruijne MC, Wagner C, et al. Adverse events and potentially preventable deaths in Dutch hospitals: results of a retrospective patient record review study. *Qual Saf Health Care.* 2009;18(4):297-302.
28. Damen NL, Baines R, Wagner C, et al. Medication-related adverse events during hospitalization: a retrospective patient record review study in The Netherlands. *Pharmacoepidemiol Drug Saf.* 2017;26(1):32-9.
29. Baines R, Langelaan M, de Bruijne M, et al. How effective are patient safety initiatives? A retrospective patient record review study of changes to patient safety over time. *BMJ Qual Saf.* 2015;24(9):561-71.
30. van Vuren W, Shea CE, van der Schaaf TW. The development of an incident analysis tool for the medical field. . Eindhoven: Eindhoven University of Technology; 1997.
31. Morimoto T, Sakuma M, Matsui K, et al. Incidence of adverse drug events and medication errors in Japan: the JADE study. *J Gen Intern Med.* 2011;26(2):148-53.
32. WHO. Medication errors: technical series on safer primary care. Geneva: World Health Organization; 2016. Available at: <http://apps.who.int/iris/bitstream/handle/10665/252274/9789241511643-eng.pdf?sequence=1>. Accessed July 12, 2018.
33. WHO. ATC/DDD Index 2017. Available at: [https://www.whocc.no/atc\\_ddd\\_index/?code=N02A](https://www.whocc.no/atc_ddd_index/?code=N02A). Accessed July 10, 2018.
34. de Vet HC, Mookink LB, Terwee CB, et al. Clinicians are right not to like Cohen's kappa. *Bmj.* 2013;346:f2125.
35. Huang AR, Mallet L. Prescribing opioids in older people. *Maturitas.* 2013;74(2):123-9.
36. Aronson JK. Balanced prescribing - principles and challenges. *Br J Clin Pharmacol.* 2012;74(4):566-72.
37. Wallwork RS, Chipidza FE, Stern TA. Obstacles to the prescription and use of opioids. *Prim Care Companion CNS Disord.* 2016;18(1):doi: 10.4088/PCC.15f01900.
38. Scott IA, Pillans PI, Barras M, et al. Using EMR-enabled computerized decision support systems to reduce prescribing of potentially inappropriate medications: a narrative review. *Ther Adv Drug Saf.* 2018;9(9):559-73.
39. Clyne B, Bradley MC, Hughes C, et al. Electronic prescribing and other forms of technology to reduce inappropriate medication use and polypharmacy in older people: a review of current evidence. *Clin Geriatr Med.* 2012;28(2):301-22.
40. Durieux P, Trinquart L, Colombet I, et al. Computerized advice on drug dosage to improve prescribing practice. *Cochrane Database Syst Rev.* 2008(3):Cd002894.
41. Minkowitz HS, Scranton R, Gruschkus SK, et al. Development and validation of a risk score to identify patients at high risk for opioid-related adverse drug events. *J Manag Care Spec Pharm.* 2014;20(9):948-58.
42. Hinderer MA-Ohoo, Boeker M, Wagner SA, et al. Integrating clinical decision support systems for pharmacogenomic testing into clinical routine - a scoping review of designs of user-system interactions in recent system development. (1472-6947 (Electronic)).

- 1
- 2
- 3 43. Agarwal D, Udoji MA, Trescot A. Genetic testing for opioid pain management: a primer. *Pain Ther.* 2017;6(1):93-105.
- 4
- 5 44. Simonsen BO, Daehlin GK, Johansson I, et al. Differences in medication knowledge and risk of errors
- 6 between graduating nursing students and working registered nurses: comparative study. *BMC Health*
- 7 *Serv Res.* 2014;14:580.
- 8 45. Williams B, Davis S. Maths anxiety and medication dosage calculation errors: A scoping review.
- 9 *Nurse Educ Pract.* 2016;20:139-46.
- 10 46. Schilp J, Boot S, de Blok C, et al. Protocol compliance of administering parenteral medication in
- 11 Dutch hospitals: an evaluation and cost estimation of the implementation. *BMJ Open.*
- 12 2014;4(12):e005232.
- 13 47. Schutijser B, Klopotowska JE, Jongerden I, et al. Nurse compliance with a protocol for safe injectable
- 14 medication administration: comparison of two multicentre observational studies. *BMJ Open.*
- 15 2018;8(1):e019648.
- 16 48. Ohashi K, Dalleur O, Dykes PC, et al. Benefits and risks of using smart pumps to reduce medication
- 17 error rates: a systematic review. *Drug Saf.* 2014;37(12):1011-20.
- 18 49. Murnion BP, Gnjidic D, Hilmer SN. Prescription and administration of opioids to hospital in-patients,
- 19 and barriers to effective use. *Pain Med.* 2010;11(1):58-66.
- 20 50. Jho HJ, Kim Y, Kong KA, et al. Knowledge, practices, and perceived barriers regarding cancer pain
- 21 management among physicians and nurses in Korea: a nationwide multicenter survey. *PLoS One.*
- 22 2014;9(8):e105900.
- 23 51. AlReshidi N, Long T, Darvill A. A systematic review of the impact of educational programs on factors
- 24 that affect nurses' post-operative pain management for children. *Compr Child Adolesc Nurs.*
- 25 2018;41(1):9-24.
- 26 52. Furniss D, Lyons I, Franklin BD, et al. Procedural and documentation variations in intravenous
- 27 infusion administration: a mixed methods study of policy and practice across 16 hospital trusts in
- 28 England. *BMC Health Serv Res.* 2018;18(1):270.
- 29 53. Hollnagel E, Wears R, Braithwaite J. From safety-I to safety-II: A white paper. The Resilient
- 30 Healthcare Net: published simultaneously by the University of Southern Denmark, University of
- 31 Florida, USA, and Macquarie University, Australia; 2015.
- 32 54. Clay-Williams R, Hounsgaard J, Hollnagel E. Where the rubber meets the road: using FRAM to align
- 33 work-as-imagined with work-as-done when implementing clinical guidelines. *Implement Sci.*
- 34 2015;10:125.
- 35 55. Hanskamp-Sebregts M, Zegers M, Vincent C, et al. Measurement of patient safety: a systematic
- 36 review of the reliability and validity of adverse event detection with record review. *BMJ Open.*
- 37 2016;6(8):e011078.
- 38 56. Baines RJ. Intra-rater agreement in adverse event studies: stability of assessment of adverse events
- 39 over time. 2018. Available at:
- 40 [https://www.nivel.nl/sites/default/files/bestanden/Proefschrift\\_Rebecca\\_Baines\\_Monitoring\\_advers](https://www.nivel.nl/sites/default/files/bestanden/Proefschrift_Rebecca_Baines_Monitoring_adverse_events_in_hospitals.pdf)
- 41 [e\\_events\\_in\\_hospitals.pdf](https://www.nivel.nl/sites/default/files/bestanden/Proefschrift_Rebecca_Baines_Monitoring_adverse_events_in_hospitals.pdf). Accessed June 26, 2020.
- 42 57. Hartwig SC, Denger SD, Schneider PJ. Severity-indexed, incident report-based medication error-
- 43 reporting program. *Am J Hosp Pharm.* 1991;48:2611-6.
- 44 58. Verenso. Richtlijn Pijn. Herkenning en behandeling van pijn bij kwetsbare ouderen. Utrecht2016.
- 45 Available at: [https://www.verenso.nl/\\_asset/public/Richtlijnen\\_kwaliteit/richtlijnen/database/VER-](https://www.verenso.nl/_asset/public/Richtlijnen_kwaliteit/richtlijnen/database/VER-003-32-Richtlijn-Pijn-deel2-v5LR.pdf)
- 46 [003-32-Richtlijn-Pijn-deel2-v5LR.pdf](https://www.verenso.nl/_asset/public/Richtlijnen_kwaliteit/richtlijnen/database/VER-003-32-Richtlijn-Pijn-deel2-v5LR.pdf). Accessed June 20, 2020.
- 47
- 48
- 49
- 50
- 51
- 52
- 53
- 54
- 55
- 56
- 57
- 58
- 59
- 60

**Table 1. Patient and hospital characteristics of all reviewed patient records, including adverse events per study period and discharge status.**

|                                                  | Study period and discharge status |                 |                   |                 |                  |
|--------------------------------------------------|-----------------------------------|-----------------|-------------------|-----------------|------------------|
|                                                  | 2008                              |                 | 2011/2012         |                 | 2015/2016        |
| <b>Hospital characteristics †</b>                | <b>Discharged</b>                 | <b>Deceased</b> | <b>Discharged</b> | <b>Deceased</b> | <b>Deceased</b>  |
| <b>Number of patient records, n</b>              | 2016                              | 2007            | 2023              | 2025            | 2846             |
| <b>General hospital, n records (%)</b>           | 1013 (50)                         | 1015 (51)       | 794 (39)          | 813 (40)        | 1197 (42)        |
| <b>Tertiary teaching hospital, n records (%)</b> | 608 (30)                          | 593 (30)        | 822 (41)          | 820 (40)        | 1052 (37)        |
| <b>Academic hospital, n records (%)</b>          | 395 (20)                          | 399 (20)        | 407 (20)          | 392 (19)        | 597 (21)         |
|                                                  | <b>2008</b>                       |                 | <b>2011/2012</b>  |                 | <b>2015/2016</b> |
| <b>Patient characteristics †</b>                 | <b>Discharged</b>                 | <b>Deceased</b> | <b>Discharged</b> | <b>Deceased</b> | <b>Deceased</b>  |
| <b>Male sex, n (%)</b>                           | 999 (50)                          | 1067 (53)       | 1027 (51)         | 1062 (52)       | 1524 (54)        |
| <b>Age (years), median (IQR)</b>                 | 62 (47-75)                        | 77 (67-84)      | 63 (48-75)        | 77 (68-84)      | 77 (68-85)       |
| <b>Length of stay (days), median (IQR)</b>       | 4 (2-8)                           | 7 (3-14)        | 3 (2-7)           | 6 (2-13)        | 4 (1-11)         |
| <b>Non-elective admission, n (%)</b>             | 1038 (51)                         | 1708 (85)       | 1063 (53)         | 1775 (88)       | 2496 (88)        |
| <b>Admission department, n (%)</b>               |                                   |                 |                   |                 |                  |
| Surgery                                          | 481 (24)                          | 276 (14)        | 472 (23)          | 239 (12)        | 340 (12)         |
| Cardiology                                       | 290 (14)                          | 291 (15)        | 272 (13)          | 247 (12)        | 360 (13)         |
| Internal medicine                                | 364 (18)                          | 599 (30)        | 365 (18)          | 597 (29)        | 876 (31)         |
| Orthopaedics                                     | 226 (11)                          | 33 (2)          | 225 (11)          | 26 (1)          | 29 (1)           |
| Neurology                                        | 150 (7)                           | 219 (11)        | 133 (7)           | 193 (10)        | 269 (9)          |
| Lung diseases                                    | 117 (6)                           | 259 (13)        | 126 (6)           | 300 (15)        | 347 (12)         |
| Urology                                          | 109 (5)                           | 18 (1)          | 111 (5)           | 28 (1)          | 23 (1)           |
| Other                                            | 279 (14)                          | 312 (16)        | 319 (16)          | 395 (20)        | 602 (21)         |
| <b>Underwent invasive procedure, n (%)</b>       | 925 (46)                          | 423 (21)        | 918 (45)          | 403 (20)        | 461 (16)         |
| <b>Adverse event occurrence §¶</b>               |                                   |                 |                   |                 |                  |
| AE, n (%)                                        | 161 (8)                           | 351 (16)        | 157 (8)           | 259 (12)        | 312 (10)         |
| ADE, n (% within population)                     | 37 (2)                            | 93 (4)          | 40 (2)            | 76 (4)          | 111 (4)          |
| ADE, n (% within adverse event)                  | 37 (23)                           | 93 (27)         | 40 (25)           | 76 (29)         | 111 (36)         |
| ORADE, n (% within population)                   | 1 (0)                             | 7 (0)           | 2 (0)             | 8 (0)           | 10 (0)           |
| ORADE, n (% within ADEs)                         | 1 (3)                             | 7 (8)           | 2 (5)             | 8 (11)          | 10 (9)           |

† Presented on patient record level.  
§ Presented on AE level.  
¶ Total number of AEs: 1240, total number of ADEs: 357, total number of opioid related ADEs: 28  
AE = Adverse event, ADE = Adverse drug event, ORADE = Opioid related adverse drug event, IQR = Interquartile range

| <b>Table 2. Characteristics of patients (n=27) with ORADEs (n=28)<sup>†</sup></b>                                                 |            |
|-----------------------------------------------------------------------------------------------------------------------------------|------------|
| <b>Patient characteristics</b>                                                                                                    |            |
| <b>Patients with an ADE, n</b>                                                                                                    | 27         |
| <b>Male sex, n (%)</b>                                                                                                            | 11 (41)    |
| <b>Age, median years (IQR)</b>                                                                                                    | 76 (66-83) |
| <b>Length of stay, median days (IQR)</b>                                                                                          | 7 (4-16)   |
| <b>Non-elective admission, n (%)</b>                                                                                              | 19 (70)    |
| <b>Terminally ill prior to admission, n (%)</b>                                                                                   | 6 (22)     |
| <b>Total number of medical specialists</b>                                                                                        |            |
| 0, n (%)                                                                                                                          | 0 (0)      |
| 1, n (%)                                                                                                                          | 4 (15)     |
| 2, n (%)                                                                                                                          | 2 (7)      |
| 3, n (%)                                                                                                                          | 21 (78)    |
| <b>Primary specialisation during admission</b>                                                                                    |            |
| Surgical, n (%)                                                                                                                   | 7 (26)     |
| Non-surgical, n (%)                                                                                                               | 20 (74)    |
| <b>Underwent invasive procedure, n (%)</b>                                                                                        | 9 (33)     |
| <b>Co-morbidity<sup>§</sup></b>                                                                                                   |            |
| No co-morbidity, n (%)                                                                                                            | 0 (0)      |
| Minor co-morbidity, n (%)                                                                                                         | 3 (11)     |
| Moderate co-morbidity, n (%)                                                                                                      | 5 (19)     |
| Significant co-morbidity, n (%)                                                                                                   | 19 (70)    |
| <sup>†</sup> Presented on patient level.                                                                                          |            |
| <sup>§</sup> The level of co-morbidity was assessed by the experts after careful review of the information in the patient record. |            |
| ADE = Adverse drug event, ORADEs = Opioid related adverse drug events                                                             |            |

| <b>Table 3. Clinical context of ORADEs (n=28)<sup>†</sup></b>                                                                                                                                                                                                                                                                                                                                                                                                                                                                                                                                                                                                                                                                                                                                                                                                    |                                                    |                                                |
|------------------------------------------------------------------------------------------------------------------------------------------------------------------------------------------------------------------------------------------------------------------------------------------------------------------------------------------------------------------------------------------------------------------------------------------------------------------------------------------------------------------------------------------------------------------------------------------------------------------------------------------------------------------------------------------------------------------------------------------------------------------------------------------------------------------------------------------------------------------|----------------------------------------------------|------------------------------------------------|
| <b>Clinical context</b>                                                                                                                                                                                                                                                                                                                                                                                                                                                                                                                                                                                                                                                                                                                                                                                                                                          | <b>Non-preventable<sup>§</sup><br/>ADEs (n=17)</b> | <b>Preventable<sup>§</sup><br/>ADEs (n=11)</b> |
| <b>Type of hospital</b>                                                                                                                                                                                                                                                                                                                                                                                                                                                                                                                                                                                                                                                                                                                                                                                                                                          |                                                    |                                                |
| University, n ADEs (%)                                                                                                                                                                                                                                                                                                                                                                                                                                                                                                                                                                                                                                                                                                                                                                                                                                           | 1 (6)                                              | 1 (9)                                          |
| Tertiary teaching, n ADEs (%)                                                                                                                                                                                                                                                                                                                                                                                                                                                                                                                                                                                                                                                                                                                                                                                                                                    | 6 (35)                                             | 4 (36)                                         |
| General, n ADEs (%)                                                                                                                                                                                                                                                                                                                                                                                                                                                                                                                                                                                                                                                                                                                                                                                                                                              | 10 (59)                                            | 6 (55)                                         |
| <b>Weekend or National holiday (yes), n (%)</b>                                                                                                                                                                                                                                                                                                                                                                                                                                                                                                                                                                                                                                                                                                                                                                                                                  | 5 (31)                                             | 2 (18)                                         |
| <b>Moment</b>                                                                                                                                                                                                                                                                                                                                                                                                                                                                                                                                                                                                                                                                                                                                                                                                                                                    |                                                    |                                                |
| 8am-5pm, n (%)                                                                                                                                                                                                                                                                                                                                                                                                                                                                                                                                                                                                                                                                                                                                                                                                                                                   | 6 (35)                                             | 5 (45)                                         |
| 5pm-11pm, n (%)                                                                                                                                                                                                                                                                                                                                                                                                                                                                                                                                                                                                                                                                                                                                                                                                                                                  | 3 (18)                                             | 0 (0)                                          |
| 11pm-8am, n (%)                                                                                                                                                                                                                                                                                                                                                                                                                                                                                                                                                                                                                                                                                                                                                                                                                                                  | 2 (12)                                             | 3 (27)                                         |
| Cannot be assessed, n (%)                                                                                                                                                                                                                                                                                                                                                                                                                                                                                                                                                                                                                                                                                                                                                                                                                                        | 6 (35)                                             | 3 (27)                                         |
| <b>Type of Opioid (ATC code)</b>                                                                                                                                                                                                                                                                                                                                                                                                                                                                                                                                                                                                                                                                                                                                                                                                                                 |                                                    |                                                |
| Opioid anesthetics (N01AH03), n (%)                                                                                                                                                                                                                                                                                                                                                                                                                                                                                                                                                                                                                                                                                                                                                                                                                              | 2 (12)                                             | 1 (9)                                          |
| Natural opium alkaloids (N02AA), n (%)                                                                                                                                                                                                                                                                                                                                                                                                                                                                                                                                                                                                                                                                                                                                                                                                                           | 9 (53)                                             | 8 (73)                                         |
| Natural opium alkaloids and Phenylpiperidine derivatives (N02AA/N02AB, combination), n (%)                                                                                                                                                                                                                                                                                                                                                                                                                                                                                                                                                                                                                                                                                                                                                                       | 1 (6)                                              | 1 (9)                                          |
| Phenylpiperidine derivatives (N02AB), n (%)                                                                                                                                                                                                                                                                                                                                                                                                                                                                                                                                                                                                                                                                                                                                                                                                                      | 2 (12)                                             | 0 (0)                                          |
| Other opioids (N02AX), n (%)                                                                                                                                                                                                                                                                                                                                                                                                                                                                                                                                                                                                                                                                                                                                                                                                                                     | 1 (6)                                              | 0 (0)                                          |
| Drugs used in opioid dependence (N07BC), n (%)                                                                                                                                                                                                                                                                                                                                                                                                                                                                                                                                                                                                                                                                                                                                                                                                                   | 2 (12)                                             | 1 (9)                                          |
| <b>Attributable factors<sup>¶</sup></b>                                                                                                                                                                                                                                                                                                                                                                                                                                                                                                                                                                                                                                                                                                                                                                                                                          |                                                    |                                                |
| Technical, n (%)                                                                                                                                                                                                                                                                                                                                                                                                                                                                                                                                                                                                                                                                                                                                                                                                                                                 | 0 (0)                                              | 0 (0)                                          |
| Care related, n (%)                                                                                                                                                                                                                                                                                                                                                                                                                                                                                                                                                                                                                                                                                                                                                                                                                                              | 3 (19)                                             | 8 (80)                                         |
| Organizational, n (%)                                                                                                                                                                                                                                                                                                                                                                                                                                                                                                                                                                                                                                                                                                                                                                                                                                            | 2 (13)                                             | 4 (40)                                         |
| Patient related, n (%)                                                                                                                                                                                                                                                                                                                                                                                                                                                                                                                                                                                                                                                                                                                                                                                                                                           | 10 (63)                                            | 6 (60)                                         |
| Violation, n (%)                                                                                                                                                                                                                                                                                                                                                                                                                                                                                                                                                                                                                                                                                                                                                                                                                                                 | 0 (0)                                              | 1 (10)                                         |
| Cannot be assessed, n (%)                                                                                                                                                                                                                                                                                                                                                                                                                                                                                                                                                                                                                                                                                                                                                                                                                                        | 3 (19)                                             | 1 (10)                                         |
| Other, n (%)                                                                                                                                                                                                                                                                                                                                                                                                                                                                                                                                                                                                                                                                                                                                                                                                                                                     | 1 (6)                                              | 0 (0)                                          |
| <p><sup>†</sup> Presented on adverse event level.</p> <p><sup>§</sup> Preventability was scored on a 6-point Likert scale: 1 = (almost) no evidence of preventability; 2 = small indications for preventability; 3 = preventability not very likely, less than 50% but 'close call'; 4 = Preventability more than likely, more than 50% but 'close call'; 5 = strong indications for preventability; 6 = (almost) certain indications of preventability. Not preventable ADEs were scored at 1-3, preventable ADEs were scored at 4-6.</p> <p><sup>¶</sup> These variables were missing for 2 patients; one in the preventable group and one in the non-preventable group. Moreover, it was possible to select more than one option for this question.</p> <p>ADE = Adverse drug event, ORADE = Opioid related adverse drug event, IQR = Interquartile range</p> |                                                    |                                                |

| <b>Box 1. Descriptions of the 28 opioid related adverse drug events divided into preventable and non-preventable.</b> |                                                                                                                                                                                                                                                                                                                                                                                                         |                                                                             |
|-----------------------------------------------------------------------------------------------------------------------|---------------------------------------------------------------------------------------------------------------------------------------------------------------------------------------------------------------------------------------------------------------------------------------------------------------------------------------------------------------------------------------------------------|-----------------------------------------------------------------------------|
| <b>Case</b>                                                                                                           | <b>Description<sup>†</sup></b>                                                                                                                                                                                                                                                                                                                                                                          | <b>Preventability score (1-6)<sup>‡</sup> and type of error<sup>§</sup></b> |
| <b>Preventable opioid related ADEs</b>                                                                                |                                                                                                                                                                                                                                                                                                                                                                                                         |                                                                             |
| <i>Cause: Dosing errors</i>                                                                                           |                                                                                                                                                                                                                                                                                                                                                                                                         |                                                                             |
| 1                                                                                                                     | Male, 90-99 years, admitted with pain after a fall. Oxycodone for the pain was unintentionally prescribed twice instead of once and also administered twice (dose unknown). This resulted in drowsiness.                                                                                                                                                                                                | 6<br>(prescribing error)                                                    |
| 2                                                                                                                     | Male, 60-69 years, suffering from colon cancer and liver metastases, was admitted for optimizing his analgesics medication. On returning from his weekend leave, he was diagnosed with oxycodone intoxication. During hospital stay, he received a too high dose of the opioid antagonist naloxone (1 mg instead of the ordered 0,4 mg) which caused confusion and agitation.                           | 6<br>(administration error)                                                 |
| 3                                                                                                                     | Female, 70-79 years, admitted with a pelvic fracture after a fall. A too high dose (dose unknown) of oxycodone was prescribed and administered resulting in hypotension and drowsiness. Consequently, she needed to be transferred to the intensive care unit.                                                                                                                                          | 5<br>(prescribing error)                                                    |
| 4                                                                                                                     | Female, 80-89 years, admitted with malaise after a fall. During her admission she received a too high dose of morphine. In her patient record, the morphine was ordered as 'as needed' (PRN). In the medication list, the morphine was ordered '6 times a day' (dose unknown). This resulted in drowsiness.                                                                                             | 5<br>(prescribing error)                                                    |
| 5                                                                                                                     | Female, 70-79 years, admitted for a plastic surgery. A high dose of intravenous administered anesthetic/pain medication (dose and medication type unknown) caused hypoventilation and a myocardial infarct. The myocardial infarct was discovered too late. She was resuscitated and ventilated. Her death was possibly caused by a hospital acquired pneumonia.                                        | 5<br>(administration error)                                                 |
| 6                                                                                                                     | Female, 50-59 years, admitted due to an aspiration pneumonia, was administered morphine. The pump mode was set at 13 ml/hour instead of 8 ml/hour as ordered. This possibly resulted in an epileptic insult requiring ventilation.                                                                                                                                                                      | 5<br>(administration error)                                                 |
| 7                                                                                                                     | Male, 60-69 years, re-admitted to the hospital due to a collapse at home. He was previously hospitalized for treatment of rib fractures and COPD Gold IV. At discharge, the doses of fentanyl and oxycodone had been significantly increased to 20 mg 4 to 6 times a day. Monitoring the effects of increasing these opioid doses was not conducted.                                                    | 4<br>(prescribing error)                                                    |
| 8                                                                                                                     | Female, 80-89 years, admitted with osteoporosis, received at home 5 mg morphine twice daily for her back pain. The dosage was increased to subcutaneous of 5 mg 4 times a day during hospital stay. Three days later, a paralytic ileus was discovered. A lower morphine dose was more appropriate for this elderly female.                                                                             | 4<br>(prescribing error)                                                    |
| 9                                                                                                                     | Female, 80-89 years, admitted with abdominal pain due to a kidney bleeding. She received morphine injections daily, varying from 2-6 subcutaneous injections of 2,5 mg per day along with transdermal fentanyl 12 mcg hourly. Severe hypercapnia eventually caused her death.                                                                                                                           | 4<br>(prescribing error)                                                    |
| 10                                                                                                                    | Male, 0-9 years, with Down syndrome, was acutely ill due to a laryngitis. He was difficult to ventilate and received antibiotics and sedatives including opioids. He was transferred to another hospital following detubation. Here, his methadone intake was reduced resulting in a delirium (dose unknown). Initially he improved, but one day unexpectedly he was found dead. It is unclear why this | 4<br>(unknown)                                                              |

|                                            |                                                                                                                                                                                                                                                                                                                                                                                 |                                             |
|--------------------------------------------|---------------------------------------------------------------------------------------------------------------------------------------------------------------------------------------------------------------------------------------------------------------------------------------------------------------------------------------------------------------------------------|---------------------------------------------|
|                                            | patient received methadone, but reducing the methadone intake may have been the problem.                                                                                                                                                                                                                                                                                        |                                             |
| <i>Cause: Incorrect decision making</i>    |                                                                                                                                                                                                                                                                                                                                                                                 |                                             |
| 11                                         | Female, 60-69 years, admitted for a laminectomy. Postoperatively she developed an ileus caused by severe constipation aggravated by administered morphine. Macrogol oral suspension (dose unknown) instead of an enema was given as treatment, which was insufficient to resolve the ileus and colon perforation occurred. Untreatable abdominal septic complications followed. | 4<br>(unknown)                              |
| <b>Non-preventable opioid related ADEs</b> |                                                                                                                                                                                                                                                                                                                                                                                 |                                             |
| 12                                         | Female, 80-89 years, admitted due to a total knee replacement. Postoperatively, drowsiness, hypotension and oliguria occurred, possibly caused by the epidural medication sufentanil (dose unknown). This may have led to a small asymptomatic myocardial infarct.                                                                                                              | 3<br>(administration error)                 |
| 13                                         | Male, 80-89 years, admitted with a perforated stomach ulcer and known stomach cancer. His extreme, not previously known, sensitivity to morphine postoperatively (dose unknown) resulted in recurrent apnea.                                                                                                                                                                    | 3<br>(other error)                          |
| 14                                         | Female, 60-69 years, suffering from lung cancer, was admitted with severe back and limb pain related to bone metastases. She was treated with transdermal fentanyl 300 mcg per hour. This resulted in drowsiness and hypoventilation.                                                                                                                                           | 2<br>(prescribing error)                    |
| 15                                         | Female, 80-89 years, known with breast cancer and multiple lung metastases. She received tramadol (dose unknown) for the pain which have been stopped due to drowsiness.                                                                                                                                                                                                        | 2<br>(unknown)                              |
| 16                                         | Male, 70-79 years, admitted with severe heart failure. He received morphine 2.5 mg for the pain. As a result of increased, not previously known, sensitivity to morphine, his saturation dropped.                                                                                                                                                                               | 2<br>(other error)                          |
| 17                                         | Male, 90-99 years, admitted because of a stroke and a lot of pain. The nurse administered 10% of the prescribed dose (dose unknown) of morphine on two occasions which caused unnecessary suffering.                                                                                                                                                                            | 2<br>(administration error)                 |
| 18                                         | Male, 60-69 years, admitted for surgery due to an ileus. Postoperative complications included an exacerbation COPD and a hospital acquired pneumonia after receiving morphine (dose unknown).                                                                                                                                                                                   | 2<br>(unknown)                              |
| 19                                         | Female, 60-69 years, admitted with a reoccurrence of drowsiness, hypoventilation and difficult to wake up which was the result of a dose of 5 mg of methadone being administered in the hospital.                                                                                                                                                                               | 2<br>(prescribing and administration error) |
| 20                                         | Female, 60-69 years, had a blood pressure drop following the administration of morphine (dose unknown) in the recovery room.                                                                                                                                                                                                                                                    | 1<br>(other error)                          |
| 21                                         | Female, 70-79 years, admitted with pain related to severe Kahler disease. For the pain, she received opioids (unknown which type and dose). The opioids caused drowsiness and because of the drowsiness, she choked once. This caused a pneumonia. The patient deceased during hospitalization.                                                                                 | 1<br>(other error)                          |
| 22                                         | Male, 70-79 years, received transdermal fentanyl and oxycodone 5 mg daily up to 6 times due to metastases in the hip. This caused apraxia and confusion.                                                                                                                                                                                                                        | 1<br>(unknown)                              |
| 23                                         | Female, 80-89 year, admitted for occlusion of an artery in her leg. She received a morphine infusion (0.5-1.0 mg/hour) causing hypoventilation with a good response to naloxone.                                                                                                                                                                                                | 1<br>(administration error)                 |
| 24                                         | Male, 80-89 years, admitted due to obstructive laryngeal cancer, was prescribed anticoagulants. This resulted in a hematoma along with severe abdominal pain for which he received morphine (dose unknown) after which he deceased.                                                                                                                                             | 1<br>(other error)                          |
| 25                                         | Male, 60-69 years, admitted with an acute respiratory insufficiency due to pneumonia. He received methadone 20 mg 2 times a day, causing hypoventilation on two occasions. This needed to be treated with naloxone.                                                                                                                                                             | 1<br>(prescribing error)                    |

|    |                                                                                                                                                                                                                                                                                                  |                          |
|----|--------------------------------------------------------------------------------------------------------------------------------------------------------------------------------------------------------------------------------------------------------------------------------------------------|--------------------------|
| 26 | Female, 80-89 years, suffered from pain due to rib fractures caused by resuscitation. She received sufentanil (dose unknown), which led to bronchospasm.                                                                                                                                         | 1<br>(unknown)           |
| 27 | Female, 70-79 years, admitted with pain related to breast cancer. During the admission, it became apparent that she had metastases along with femur and vertebral fractures. A high dose of morphine (dose unknown) was necessary to relieve her pain which consequently resulted in a delirium. | 1<br>(prescribing error) |
| 28 | Female, 80-89 years, admitted due to a hip fracture and pain. For her restlessness and pain she was administered 1 mg morphine which probably caused a reduced level of consciousness.                                                                                                           | 1<br>(other error)       |

*† Patients were categorized in age groups of ten years to avoid traceability.*

*‡ Preventability was scored on a 6-point Likert scale: 1 = (almost) no evidence of preventability; 2 = small indications for preventability; 3 = preventability not very likely, less than 50% but 'close call'; 4 = Preventability more than likely, more than 50% but 'close call'; 5 = strong indications for preventability; 6 = (almost) certain indications of preventability.*

*§ For the judgment on preventability and type of error, the experts had access to all information in the electronic patient record and therefore to the whole context in which ADEs occurred. The types of error were: prescribing error, administration error, other error (e.g. side-effects) or unknown.*



1  
2  
3 **Figure legend**  
4

5 **Figure 1: Overview of the three Dutch adverse event studies and our study.**  
6  
7  
8  
9  
10  
11  
12  
13  
14  
15  
16  
17  
18  
19  
20  
21  
22  
23  
24  
25  
26  
27  
28  
29  
30  
31  
32  
33  
34  
35  
36  
37  
38  
39  
40  
41  
42  
43  
44  
45  
46  
47  
48  
49  
50  
51  
52  
53  
54  
55  
56  
57  
58  
59  
60

For peer review only

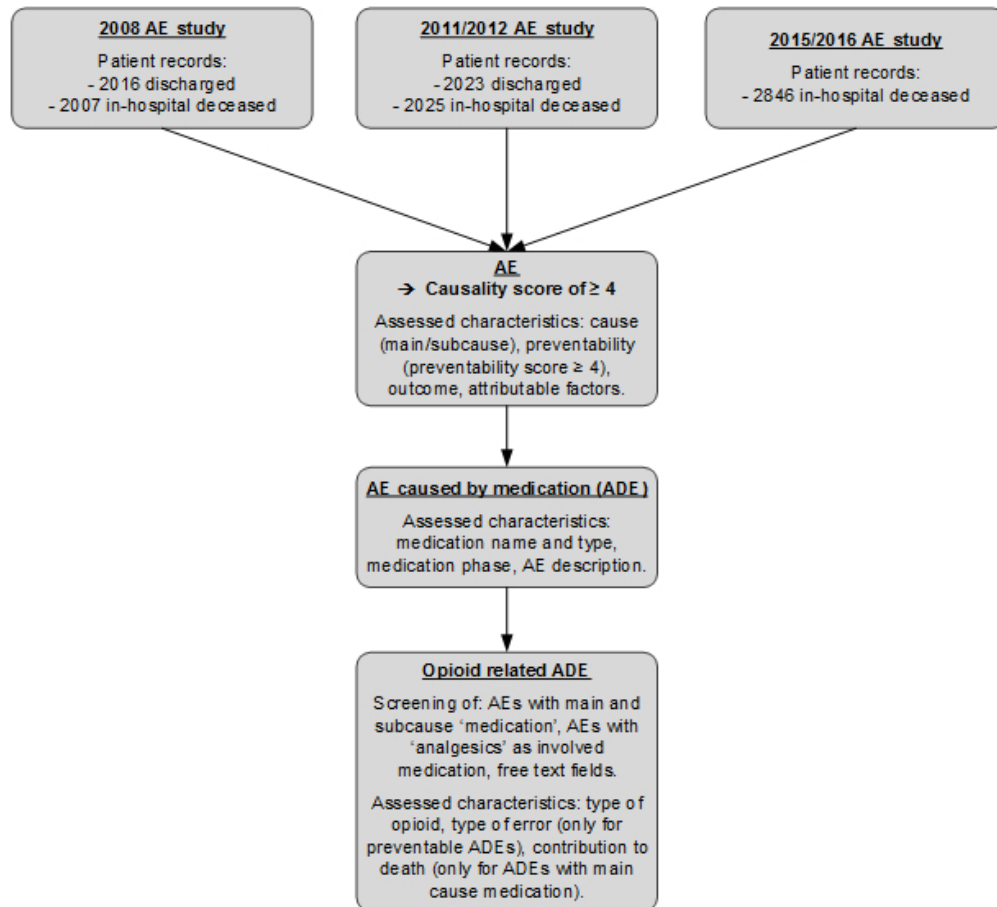

**Figure 1:** Overview of the three Dutch adverse event studies and our study.

| <b>Supplemental Table 1: Preventability, preparatory and judgment questions for physicians.</b>                                            |                                                                                                                                                                                                                                                                                                                                                  |
|--------------------------------------------------------------------------------------------------------------------------------------------|--------------------------------------------------------------------------------------------------------------------------------------------------------------------------------------------------------------------------------------------------------------------------------------------------------------------------------------------------|
| <b>Question</b>                                                                                                                            | <b>Answer options</b>                                                                                                                                                                                                                                                                                                                            |
| 1. How complex was this case?                                                                                                              | Very complex/Moderately complex/Somewhat complex/Not complex/Unable to determine                                                                                                                                                                                                                                                                 |
| 2. Was the management of the primary illness (not the adverse event) appropriate?                                                          | Definitely appropriate/Possibly appropriate/Probably appropriate/Definitely not appropriate                                                                                                                                                                                                                                                      |
| 3. What was the degree of deviation of management of the primary illness (not the adverse event) from the accepted norm?                   | Severe/Moderate/Little/None                                                                                                                                                                                                                                                                                                                      |
| 4. What was the comorbidity of the patient?                                                                                                | Significant comorbidity/Moderate comorbidity/Mild comorbidity/No comorbidity                                                                                                                                                                                                                                                                     |
| 5. What was the degree of emergency in management of the primary illness (not the adverse event) prior to the occurrence of adverse event? | Very urgent/Moderately urgent/Not urgent                                                                                                                                                                                                                                                                                                         |
| 6. What potential benefit was associated with the management of the illness which led to the Adverse Event?                                | Lifesaving/Curing/Life prolonging/Symptom relief/Palliation/No potential benefit                                                                                                                                                                                                                                                                 |
| 7. What was the chance of benefit associated with the management of the illness which led to the adverse event?                            | High/Moderate/Low/Not applicable                                                                                                                                                                                                                                                                                                                 |
| 8. What was the risk of an adverse event related to the management?                                                                        | High/Moderate/Low/Not applicable                                                                                                                                                                                                                                                                                                                 |
| 9. Is the injury/complication a recognised complication?                                                                                   | No/Yes/Not applicable                                                                                                                                                                                                                                                                                                                            |
| 10. What percentage of patients like this would be expected to have this complication?                                                     | Unable to determine (UTD)/Not applicable/<1%/1%–9%/10%–24%/≥25%                                                                                                                                                                                                                                                                                  |
| 11. On reflection, would a reasonable doctor or health professional repeat this healthcare management strategy again?                      | Definitely/Probably/Probably not/Definitely not                                                                                                                                                                                                                                                                                                  |
| 12. Was there a comment in the medical records indicating a need for follow-up as a result of this adverse event? (select all that apply)  | No/Counselling/Psychiatric/Rehabilitation/Routine clinical/Other/UTD                                                                                                                                                                                                                                                                             |
| 13. Did the patient have any follow-up as a result of this adverse event?                                                                  | No/Counselling/Psychiatric/Rehabilitation/Routine clinical/Other/UTD                                                                                                                                                                                                                                                                             |
| <b>Final judgment</b><br>Please indicate to what extent there are indications that the event was preventable:                              | 1. (Virtually) no evidence for preventability<br>2. Slight to modest evidence of preventability<br>3. Preventability not quite likely (less than 50/50, but 'close call')<br>4. Preventability more than likely (more than 50/50, but 'close call')<br>5. Strong evidence of preventability<br>6. (Virtually) certain evidence of preventability |

| Supplemental Table 2: Positive and negative agreement (%) between nurses and physicians during the adverse events studies. <sup>†‡</sup> |                    |                    |                            |                    |                             |                    |
|------------------------------------------------------------------------------------------------------------------------------------------|--------------------|--------------------|----------------------------|--------------------|-----------------------------|--------------------|
|                                                                                                                                          | Nurses             |                    | Physicians – adverse event |                    | Physicians - preventability |                    |
| Study                                                                                                                                    | Positive agreement | Negative agreement | Positive agreement         | Negative agreement | Positive agreement          | Negative agreement |
| 2008                                                                                                                                     | 76.0               | 89.0               | 63.3                       | 86.9               | n/a                         | n/a                |
| 2011/2012                                                                                                                                | 85.8               | 63.3               | 56.9                       | 82.9               | 73.3                        | 83.3               |
| 2015/2016                                                                                                                                | 91.5               | 68.9               | 54.3                       | 80.9               | 71.4                        | 81.0               |

<sup>†</sup> All frequencies are separately calculated by a 2x2 table:

|                     |                    | Nurse / Physician 1 |                    |
|---------------------|--------------------|---------------------|--------------------|
|                     |                    | Positive agreement  | Negative agreement |
| Nurse / Physician 2 | Positive agreement | A                   | B                  |
|                     | Negative agreement | C                   | D                  |

Positive agreement =  $(2xA) / ((2xA)+B+C)$  and negative agreement =  $(2xD) / ((2xD)+B+C)$ .

<sup>‡</sup> The interpretation of the Kappa is not straightforward, and it is influenced by the number of categories of each variable and the prevalence of the given scores. It is therefore possible that despite a high agreement, the Kappa is low. This occurs in studies with few adverse events. For this reason we chose to present positive and negative agreement frequencies. It helps to answer questions such as: 'if one expert finds a preventable adverse event, what is the probability that another expert will also find a preventable adverse event?'

**STROBE Statement**—Checklist of items that should be included in reports of *cross-sectional studies*

|                              | Item No | Recommendation                                                                                                                                                                                               | Page number |
|------------------------------|---------|--------------------------------------------------------------------------------------------------------------------------------------------------------------------------------------------------------------|-------------|
| <b>Title and abstract</b>    | 1       | (a) Indicate the study's design with a commonly used term in the title or the abstract                                                                                                                       | 1-2         |
|                              |         | (b) Provide in the abstract an informative and balanced summary of what was done and what was found                                                                                                          | 2           |
| <b>Introduction</b>          |         |                                                                                                                                                                                                              |             |
| Background/rationale         | 2       | Explain the scientific background and rationale for the investigation being reported                                                                                                                         | 4           |
| Objectives                   | 3       | State specific objectives, including any prespecified hypotheses                                                                                                                                             | 4           |
| <b>Methods</b>               |         |                                                                                                                                                                                                              |             |
| Study design                 | 4       | Present key elements of study design early in the paper                                                                                                                                                      | 4           |
| Setting                      | 5       | Describe the setting, locations, and relevant dates, including periods of recruitment, exposure, follow-up, and data collection                                                                              | 4-5         |
| Participants                 | 6       | (a) Give the eligibility criteria, and the sources and methods of selection of participants                                                                                                                  | 5           |
| Variables                    | 7       | Clearly define all outcomes, exposures, predictors, potential confounders, and effect modifiers. Give diagnostic criteria, if applicable                                                                     | 6           |
| Data sources/<br>measurement | 8*      | For each variable of interest, give sources of data and details of methods of assessment (measurement). Describe comparability of assessment methods if there is more than one group                         | 5-6         |
| Bias                         | 9       | Describe any efforts to address potential sources of bias                                                                                                                                                    | 9-10        |
| Study size                   | 10      | Explain how the study size was arrived at                                                                                                                                                                    | 4-5         |
| Quantitative variables       | 11      | Explain how quantitative variables were handled in the analyses. If applicable, describe which groupings were chosen and why                                                                                 | 6           |
| Statistical methods          | 12      | (a) Describe all statistical methods, including those used to control for confounding                                                                                                                        | 6           |
|                              |         | (b) Describe any methods used to examine subgroups and interactions                                                                                                                                          | 6           |
|                              |         | (c) Explain how missing data were addressed                                                                                                                                                                  | n.a.        |
|                              |         | (d) If applicable, describe analytical methods taking account of sampling strategy                                                                                                                           | n.a.        |
|                              |         | (e) Describe any sensitivity analyses                                                                                                                                                                        | n.a.        |
| <b>Results</b>               |         |                                                                                                                                                                                                              |             |
| Participants                 | 13*     | (a) Report numbers of individuals at each stage of study—eg numbers potentially eligible, examined for eligibility, confirmed eligible, included in the study, completing follow-up, and analysed            | 7           |
|                              |         | (b) Give reasons for non-participation at each stage                                                                                                                                                         | 4           |
|                              |         | (c) Consider use of a flow diagram                                                                                                                                                                           | n.a.        |
| Descriptive data             | 14*     | (a) Give characteristics of study participants (eg demographic, clinical, social) and information on exposures and potential confounders                                                                     | 7-8         |
|                              |         | (b) Indicate number of participants with missing data for each variable of interest                                                                                                                          | 7-8         |
| Outcome data                 | 15*     | Report numbers of outcome events or summary measures                                                                                                                                                         | 7-8         |
| Main results                 | 16      | (a) Give unadjusted estimates and, if applicable, confounder-adjusted estimates and their precision (eg, 95% confidence interval). Make clear which confounders were adjusted for and why they were included | 7-8         |

1  
2  
3  
4  
5  
6  
7  
8  
9  
10  
11  
12  
13  
14  
15  
16  
17  
18  
19  
20  
21  
22  
23  
24  
25  
26  
27  
28  
29  
30  
31  
32  
33  
34  
35  
36  
37  
38  
39  
40  
41  
42  
43  
44  
45  
46  
47  
48  
49  
50  
51  
52  
53  
54  
55  
56  
57  
58  
59  
60

|                          |    |                                                                                                                                                                            |      |
|--------------------------|----|----------------------------------------------------------------------------------------------------------------------------------------------------------------------------|------|
|                          |    | (b) Report category boundaries when continuous variables were categorized                                                                                                  | 7-8  |
|                          |    | (c) If relevant, consider translating estimates of relative risk into absolute risk for a meaningful time period                                                           | n.a. |
| Other analyses           | 17 | Report other analyses done—eg analyses of subgroups and interactions, and sensitivity analyses                                                                             | n.a. |
| <b>Discussion</b>        |    |                                                                                                                                                                            |      |
| Key results              | 18 | Summarise key results with reference to study objectives                                                                                                                   | 8    |
| Limitations              | 19 | Discuss limitations of the study, taking into account sources of potential bias or imprecision. Discuss both direction and magnitude of any potential bias                 | 9-10 |
| Interpretation           | 20 | Give a cautious overall interpretation of results considering objectives, limitations, multiplicity of analyses, results from similar studies, and other relevant evidence | 8-10 |
| Generalisability         | 21 | Discuss the generalisability (external validity) of the study results                                                                                                      | 9    |
| <b>Other information</b> |    |                                                                                                                                                                            |      |
| Funding                  | 22 | Give the source of funding and the role of the funders for the present study and, if applicable, for the original study on which the present article is based              | 11   |

n.a. = not applicable

\*Give information separately for exposed and unexposed groups.

**Note:** An Explanation and Elaboration article discusses each checklist item and gives methodological background and published examples of transparent reporting. The STROBE checklist is best used in conjunction with this article (freely available on the Web sites of PLoS Medicine at <http://www.plosmedicine.org/>, Annals of Internal Medicine at <http://www.annals.org/>, and Epidemiology at <http://www.epidem.com/>). Information on the STROBE Initiative is available at [www.strobe-statement.org](http://www.strobe-statement.org).
