# Supplementary material for: Nature of adverse events with opioids in hospitalised patients: a post-hoc analysis of three patient record review studies
Source: PubMed Central journal article supplement — BMJ Open. 2020 Sep 30;10(9):e038037. doi: 10.1136/bmjopen-2020-038037 (PMC7528356; doi:10.1136/bmjopen-2020-038037), 2020-09-30
Supplement: bmjopen-2020-038037supp001.pdf [file bmjopen-2020-038037supp001.pdf]

| <b>Supplemental Table 1: Preventability, preparatory and judgment questions for physicians.</b>                                            |                                                                                                                                                                                                                                                                                                                                                                                                                                  |
|--------------------------------------------------------------------------------------------------------------------------------------------|----------------------------------------------------------------------------------------------------------------------------------------------------------------------------------------------------------------------------------------------------------------------------------------------------------------------------------------------------------------------------------------------------------------------------------|
| <b>Question</b>                                                                                                                            | <b>Answer options</b>                                                                                                                                                                                                                                                                                                                                                                                                            |
| 1. How complex was this case?                                                                                                              | Very complex/Moderately complex/Somewhat complex/Not complex/Unable to determine                                                                                                                                                                                                                                                                                                                                                 |
| 2. Was the management of the primary illness (not the adverse event) appropriate?                                                          | Definitely appropriate/Possibly appropriate/Probably appropriate/Definitely not appropriate                                                                                                                                                                                                                                                                                                                                      |
| 3. What was the degree of deviation of management of the primary illness (not the adverse event) from the accepted norm?                   | Severe/Moderate/Little/None                                                                                                                                                                                                                                                                                                                                                                                                      |
| 4. What was the comorbidity of the patient?                                                                                                | Significant comorbidity/Moderate comorbidity/Mild comorbidity/No comorbidity                                                                                                                                                                                                                                                                                                                                                     |
| 5. What was the degree of emergency in management of the primary illness (not the adverse event) prior to the occurrence of adverse event? | Very urgent/Moderately urgent/Not urgent                                                                                                                                                                                                                                                                                                                                                                                         |
| 6. What potential benefit was associated with the management of the illness which led to the Adverse Event?                                | Lifesaving/Curing/Life prolonging/Symptom relief/Palliation/No potential benefit                                                                                                                                                                                                                                                                                                                                                 |
| 7. What was the chance of benefit associated with the management of the illness which led to the adverse event?                            | High/Moderate/Low/Not applicable                                                                                                                                                                                                                                                                                                                                                                                                 |
| 8. What was the risk of an adverse event related to the management?                                                                        | High/Moderate/Low/Not applicable                                                                                                                                                                                                                                                                                                                                                                                                 |
| 9. Is the injury/complication a recognised complication?                                                                                   | No/Yes/Not applicable                                                                                                                                                                                                                                                                                                                                                                                                            |
| 10. What percentage of patients like this would be expected to have this complication?                                                     | Unable to determine (UTD)/Not applicable/<1/1%-9%/10%-24%/>=25%                                                                                                                                                                                                                                                                                                                                                                  |
| 11. On reflection, would a reasonable doctor or health professional repeat this healthcare management strategy again?                      | Definitely/Probably/Probably not/Definitely not                                                                                                                                                                                                                                                                                                                                                                                  |
| 12. Was there a comment in the medical records indicating a need for follow-up as a result of this adverse event? (select all that apply)  | No/Counselling/Psychiatric/Rehabilitation/Routine clinical/Other/UTD                                                                                                                                                                                                                                                                                                                                                             |
| 13. Did the patient have any follow-up as a result of this adverse event?                                                                  | No/Counselling/Psychiatric/Rehabilitation/Routine clinical/Other/UTD                                                                                                                                                                                                                                                                                                                                                             |
| <b>Final judgment</b><br>Please indicate to what extent there are indications that the event was preventable:                              | <ol style="list-style-type: none"> <li>1. (Virtually) no evidence for preventability</li> <li>2. Slight to modest evidence of preventability</li> <li>3. Preventability not quite likely (less than 50/50, but 'close call')</li> <li>4. Preventability more than likely (more than 50/50, but 'close call')</li> <li>5. Strong evidence of preventability</li> <li>6. (Virtually) certain evidence of preventability</li> </ol> |
