# Supplementary material for: Nature of adverse events with opioids in hospitalised patients: a post-hoc analysis of three patient record review studies
Source: PubMed Central journal article supplement — BMJ Open. 2020 Sep 30;10(9):e038037. doi: 10.1136/bmjopen-2020-038037 (PMC7528356; doi:10.1136/bmjopen-2020-038037), 2020-09-30
Supplement: bmjopen-2020-038037supp002.pdf [file bmjopen-2020-038037supp002.pdf]

| <b>Supplemental Table 2: Positive and negative agreement (%) between nurses and physicians during the adverse events studies.†‡</b> |                    |                    |                                   |                    |                                    |                    |
|-------------------------------------------------------------------------------------------------------------------------------------|--------------------|--------------------|-----------------------------------|--------------------|------------------------------------|--------------------|
|                                                                                                                                     | <b>Nurses</b>      |                    | <b>Physicians – adverse event</b> |                    | <b>Physicians - preventability</b> |                    |
| <b>Study</b>                                                                                                                        | Positive agreement | Negative agreement | Positive agreement                | Negative agreement | Positive agreement                 | Negative agreement |
| <b>2008</b>                                                                                                                         | 76.0               | 89.0               | 63.3                              | 86.9               | n/a                                | n/a                |
| <b>2011/2012</b>                                                                                                                    | 85.8               | 63.3               | 56.9                              | 82.9               | 73.3                               | 83.3               |
| <b>2015/2016</b>                                                                                                                    | 91.5               | 68.9               | 54.3                              | 80.9               | 71.4                               | 81.0               |

† All frequencies are separately calculated by a 2x2 table:

|                     |                    | Nurse / Physician 1 |                    |
|---------------------|--------------------|---------------------|--------------------|
|                     |                    | Positive agreement  | Negative agreement |
| Nurse / Physician 2 | Positive agreement | A                   | B                  |
|                     | Negative agreement | C                   | D                  |

Positive agreement =  $(2xA) / ((2xA)+B+C)$  and negative agreement =  $(2xD) / ((2xD)+B+C)$ .

‡ The interpretation of the Kappa is not straightforward, and it is influenced by the number of categories of each variable and the prevalence of the given scores. It is therefore possible that despite a high agreement, the Kappa is low. This occurs in studies with few adverse events. For this reason we chose to present positive and negative agreement frequencies. It helps to answer questions such as: 'if one expert finds a preventable adverse event, what is the probability that another expert will also find a preventable adverse event?'
